1 **mTORC1 activity is dispensable for synthesis of KSHV lytic proteins**

2 Eric S. Pringle<sup>1,2</sup>, Carolyn-Ann Robinson<sup>1</sup>, Nicolas Crapoulet<sup>3</sup>, Andrea L-A. Monjo<sup>1</sup>, Andrew M.

3 Leidal<sup>4</sup>, Stephen M. Lewis<sup>1,2,3,5,6</sup>, Daniel Gaston<sup>2,6</sup>, James Uniacke<sup>8</sup>, Craig McCormick<sup>1,2\*</sup>

4

5 <sup>1</sup>Department of Microbiology and Immunology, Dalhousie University, 5850 College Street,

6 Halifax NS, Canada B3H 4R2

7 <sup>2</sup>Beatrice Hunter Cancer Research Institute, 5850 College Street, Halifax NS B3H 4R2

8 <sup>3</sup>Atlantic Cancer Research Institute, 35 Providence Street, Moncton NB, Canada E1C 8X3

9 <sup>4</sup>Department of Pathology, 513 Parnassus Ave., University of California San Francisco, San

10 Francisco CA, USA 94143

11 <sup>5</sup>Department of Chemistry and Biochemistry, Université de Moncton, Moncton NB, Canada,

12 E1A 3E9

13 <sup>6</sup>Department of Biology, University of New Brunswick, Saint John NB, Canada, E2L 4L5

14 <sup>7</sup>Department of Pathology, Dalhousie University, 5850 University Ave., Halifax NS, Canada

15 B3H 1V8

16 <sup>8</sup>Department of Pathology and Laboratory Medicine, 5788 University Ave., Nova Scotia Health

17 Authority. Halifax NS, Canada B3H 1V8

18 <sup>9</sup>Department of Molecular and Cellular Biology, University of Guelph, 50 Stone Rd. E., Guelph

19 ON, Canada N1G 2W1

20 \*Corresponding author: C.M., [craig.mccormick@dal.ca](mailto:craig.mccormick@dal.ca)

21 Running Title: mTORC1-independent synthesis of KSHV proteins

22 Keywords: KSHV; lytic; mTORC1; eIF4F; translation initiation; polysomes; translational

23 efficiency

## 24 **Abstract**

25 Herpesvirus genomes are decoded by host RNA polymerase enzymes, generating mRNAs that  
26 are post-transcriptionally modified and exported to the cytoplasm through the combined work of  
27 host and viral factors. These viral mRNAs bear 5'-m<sup>7</sup>G caps and poly(A) tails that should permit  
28 assembly of canonical eIF4F cap-binding complexes to initiate protein synthesis. However, the  
29 precise mechanisms of translation initiation remain to be investigated for most herpesviruses.  
30 eIF4F assembly requires mTORC1-dependent phosphorylation of 4E-BP1, which releases eIF4E  
31 from repressive protein complexes. Here, we report that mTORC1 is active and eIF4F is readily  
32 detectable throughout the Kaposi's sarcoma-associated herpesvirus (KSHV) replication cycle.  
33 Pharmacologic inhibition of mTORC1 activity caused eIF4F disassembly in KSHV-infected  
34 cells, indicating that the mTORC1/4E-BP1/eIF4F signalling axis was intact during virus  
35 replication. mTORC1 activity contributed to global protein synthesis in infected cells and was  
36 required for lytic gene expression immediately upon reactivation from latency. However, once  
37 early gene expression had begun, mTORC1 activity was largely dispensable for viral genome  
38 replication, late gene expression, and release of infectious viral progeny. Furthermore, polysome  
39 fractionation and RNA-sequencing analysis demonstrated that the translational efficiency of viral  
40 mRNA was unaltered by changes in the abundance of eIF4F. Accumulating evidence suggests  
41 that herpesvirus mRNA translation can be initiated in an eIF4F-independent manner by an  
42 alternative mTORC1/4EBP1-resistant initiation complex, thereby facilitating translation of viral  
43 mRNA and the production of infectious progeny.

## 45 **Author summary**

46 All viruses require complex host cell machinery to convert viral mRNAs into proteins. Efficient  
47 protein synthesis is required to meet the high anabolic demands of a growing cell. A protein  
48 complex known as mechanistic target of rapamycin complex 1 (mTORC1) is a master regulator  
49 of protein synthesis. In nutrient-rich conditions, mTORC1 is active and promotes protein  
50 synthesis. In nutrient-poor conditions or under stress, mTORC1 is rapidly shut off, and global  
51 protein synthesis is arrested. Remarkably, we discovered that synthesis of Kaposi's sarcoma-  
52 associated herpesvirus (KSHV) proteins is largely resistant to drugs that inhibit mTORC1,  
53 including rapamycin and a more recently developed drug known as Torin. These surprising  
54 findings suggest that herpesviruses may employ previously unknown mechanisms to ensure  
55 efficient synthesis of viral proteins in situations when canonical translation initiation machinery  
56 would be expected to succumb to stress.

57

## 58 **Introduction**

59 Kaposi's sarcoma-associated herpesvirus (KSHV) is the infectious cause of Kaposi's  
60 sarcoma (KS), primary effusion lymphoma (PEL) and multicentric Castleman's disease [1-3].  
61 Like all herpesviruses, KSHV can establish a quiescent form of infection known as latency in  
62 which viral gene expression is severely restricted and the genome is maintained in an episomal  
63 form. An essential feature of latency is reversibility, which is required for viral replication and  
64 production of viral progeny. Reactivation from latency requires the immediate-early lytic switch  
65 protein replication and transcriptional activator (RTA) (ORF50), which initiates an ordered,  
66 temporal, cascade of gene expression [4,5]. RTA recruits host cell cofactors like RBPκ to  
67 transactivate the promoters of viral early genes required for viral genome replication [6,7]. Viral  
68 genome replication licenses the transition to ORF24/ORF31/ORF34-dependent transcription of  
69 late genes that encode structural proteins [8-11].

70 KSHV mRNAs are transcribed by host RNA polymerase II (pol II) and post-transcriptionally  
71 modified by host 7-methyl guanosine (m<sup>7</sup>G) capping, poly-adenylation, and splicing machinery.  
72 Co-transcriptional mRNA splicing is required for recruitment of the human transcription/export  
73 (hTREX) complex to host cell mRNAs to stabilize and promote the export of messenger  
74 ribonucleoproteins (mRNPs). Most KSHV mRNAs are not spliced and hTREX recruitment is  
75 mediated directly by a viral RNA-binding protein (RBP) ORF57, a homologue of HSV-1 ICP27,  
76 also known as mRNA transcript accumulation (Mta) [12]. ORF57 RNA-binding determinants  
77 and interplay with other components of the host mRNA processing machinery remain poorly  
78 defined. In addition to controlling viral mRNA stability and export, ORF57 has also been shown  
79 to increase viral mRNA translation by binding directly to a host exon-junction complex protein  
80 known as PYM [12].

81       Viral transcripts must compete with host cell mRNAs for ribosomes and translation initiation  
82 factors. Translation initiation of capped-and-polyadenylated mRNA typically requires formation  
83 of the eukaryotic initiation factor 4F (eIF4F) complex, which comprises the cap-binding protein  
84 eIF4E, RNA-helicase eIF4A, and the large scaffolding protein eIF4G [13,14]. Assembly of  
85 eIF4F is regulated by eIF4E-binding proteins, such as 4E-BP1, which prevents association of  
86 eIF4E and eIF4G. In nutrient-rich conditions 4E-BP1 is maintained in an inactive form by  
87 phosphorylation mediated by the serine/threonine kinase mammalian target of rapamycin  
88 complex 1 (mTORC1) [15-17]. mTORC1 integrates nutrient and growth promoting signals to  
89 regulate translation. mTORC1 also regulates activation of autophagy by inhibitory  
90 phosphorylation of ULK1/2 and Atg13 [18].

91       mTORC1 activation is a hallmark of KSHV infection; several KSHV gene products have  
92 been shown to stimulate or mimic mTORC1 activation (reviewed in [19]) and mTORC1  
93 substrates are phosphorylated in KS lesions [20]. KSHV early lytic gene products K1 and  
94 vGPCR activate mTORC1 by stimulating the upstream mTORC1 kinase Akt [21,22]. Moreover,  
95 two other viral proteins partially mimic mTORC1 signalling. The viral serine/threonine kinase  
96 ORF36 has limited homology to the mTORC1 substrate ribosomal protein S6 kinase 1 beta  
97 (RPS6KB1, better known as p70S6K1) and phosphorylates a similar array of substrates [23]. In  
98 contrast, ORF45 assembles an activated complex of ERK and RSK that can stimulate  
99 phosphorylation of eIF4B and ribosomal protein S6 (S6), which are normally phosphorylated in  
100 an mTORC1/p70S6K1 dependent manner [24]. Consistent with the action of these viral gene  
101 products, 4E-BP1 is hyper-phosphorylated during KSHV lytic replication and lytic replication is  
102 permissive for eIF4F assembly [25]. This suggests that eIF4F is available for translation of viral  
103 mRNA during lytic replication.

104 mRNA stability and translation are co-ordinately regulated during times of stress by  
105 mTORC1 and stress-sensing eIF2 $\alpha$  kinases [16,26]. For example, nutrient deprivation inhibits  
106 mTORC1, resulting in dephosphorylation of 4E-BP1, preventing eIF4F assembly, and  
107 simultaneously triggers general control nonderepressible-2 (GCN2)-mediated phosphorylation of  
108 eIF2 $\alpha$ . This prevents the formation of the eukaryotic initiation factor 2 (eIF2)–GTP–Met-  
109 tRNA<sup>Met</sup> ternary complex required for translation initiation. Moreover, mRNAs with 5'  
110 terminal oligo pyrimidine (TOP) or pyrimidine-rich translational element (PRTE) sequences  
111 have been shown to be very sensitive to mTORC1 inhibition, although precise the mechanisms  
112 remain obscure [27,28]. HCMV infection has been shown to reprogram the translational  
113 efficiencies (TEs) of cellular mRNAs [29], suggesting that TE is more than an intrinsic quality of  
114 an mRNA sequence, but can be dynamically regulated, likely by RBPs. However, it is unclear  
115 whether translation of viral mRNPs is affected by stresses that accompany virus replication.

116 Here we show that mTORC1 activity is required for reactivation from latency, but after  
117 early gene expression, mTORC1 is largely dispensable for viral genome replication, late gene  
118 expression and virion production. We demonstrate that eIF4F assembles during the KSHV lytic  
119 cycle in an mTORC1-dependent manner, but eIF4F loss has no significant effect on viral mRNA  
120 translational efficiency. These findings suggest that while eIF4F is available for cap-dependent  
121 translation initiation during lytic replication, viral mRNA translation can be initiated by an  
122 eIF4F-independent mechanism when eIF4F is limited.

123

124

125

126

## 127 **Results**

### 128 **mTORC1 is dispensable for KSHV genome replication and synthesis of late proteins**

129 KSHV lytic replication features mTORC1 activation [19,30] but it is not yet known whether  
130 mTORC1 activity is required to support viral replication. We tested the requirement for  
131 mTORC1 activity in the iSLK.219 cell line [31], which displays stable latent KSHV infection  
132 and provides the immediate-early (IE) *RTA* gene in *trans* under the control of a doxycycline  
133 (dox)-regulated promoter; dox addition causes accumulation of the RTA lytic switch protein and  
134 reactivation from latency. Early viral proteins were readily detected at 24h post-lytic induction  
135 (hpi; Fig 1A), and genome replication and late gene expression were detected at 48 hpi (Fig 1B-  
136 D). Treatment of cells with the herpesvirus DNA polymerase inhibitor phosphonoacetic acid  
137 (PAA) at 24 hpi prevented genome replication (Fig 1B) and late protein accumulation (Fig 1A)  
138 indicating that only IE and early (E) gene expression occurred by 24 hpi. During lytic  
139 replication, iSLK.219 cells express an RFP reporter transgene driven by an RTA-responsive lytic  
140 promoter in the viral genome [32]. Without the addition of additional chemical reagents such as  
141 phorbol esters (TPA/PMA) or histone deacetylase inhibitors [31], lytic reactivation in iSLK.219  
142 cells is relatively inefficient with only ~20% of cells expressing RFP (Fig 1D).

143 We used rapamycin and Torin to pharmacologically inhibit mTORC1 and DMSO as a  
144 vehicle control in this study. Rapamycin is a relatively inefficient mTORC1 allosteric inhibitor  
145 that does not target mTORC2 [33-35]. In iSLK.219 cells, rapamycin treatment delivered at the  
146 time of lytic reactivation with dox (0 hpi), inhibited phosphorylation of the downstream mTOR  
147 target S6 but had little effect on the phosphorylation status of 4E-BP1 (Fig 1A). In contrast,  
148 treatment with the mTOR active site inhibitor Torin, which inhibits both mTORC1 and  
149 mTORC2 complexes [34], completely inhibited both S6 and 4E-BP1 phosphorylation. Treatment

150 with rapamycin at the time of dox-induced lytic reactivation (0 hpi) modestly inhibited viral  
151 protein accumulation, whereas Torin potently inhibited accumulation of viral proteins across all  
152 temporal classes, including IE (RTA), early (E: ORF45) and late (L: K8.1, ORF65) (Fig 1A). In  
153 keeping with this broad inhibition of viral protein accumulation, Torin treatment also inhibited  
154 accumulation of the RTA-dependent RFP reporter (Fig 1D), newly-replicated viral genomes (Fig  
155 1B), and late viral mRNAs (Fig 1C) when delivered concurrently with dox. If treatment with  
156 Torin or rapamycin was delayed to 24 hpi, the phosphorylation status of S6 and 4E-BP1 was  
157 similar to that of the treatment at 0 hpi, suggesting that mTORC1 is similarly required for  
158 phosphorylation of these canonical target proteins throughout lytic replication. However,  
159 delaying treatment with Torin to 24 hpi allowed viral genomes to replicate, and late mRNAs and  
160 viral proteins to accumulate to levels comparable to vehicle-treated controls over the subsequent  
161 24-48 h (Fig 1A-D). These findings suggest that even though mTORC1 is active during KSHV  
162 lytic replication, it may be dispensable for the synthesis of viral proteins in middle and late  
163 stages of the lytic replication cycle.

164 To determine whether mTOR inhibition affects virion production, we used a FACS-based  
165 titering assay to detect the release of recombinant virions bearing a *GFP* gene driven by a  
166 constitutive EF-1 $\alpha$  promoter. Supernatants from iSLK.219 cultures were used to infect a  
167 monolayer of recipient 293A. Quantification of GFP-positive cells in this monolayer by FACS  
168 revealed that the first virions are produced by dox-treated iSLK.219 cells as early as 48 hpi and  
169 virion production was maximal by 96 hpi (Fig 2A). Cells treated with Torin at 0 produced very  
170 few infectious virions, as measured by FACS, but delaying Torin treatment to 12 hpi allowed  
171 approximately 50% of maximal virion production compared to vehicle control (Fig 2B).  
172 Delaying Torin treatment to 24, 48, and 72 hpi allowed for a steady increased in the release of



173 infectious virions from these cells, such that treatment with Torin at 72 hpi produced nearly as  
174 many virions as vehicle control. We corroborated this finding in TRex-BCBL1-RTA cells [36], a  
175 modified PEL cell line which also bears a dox-inducible *RTA* transgene. As in the iSLK.219  
176 cells, dox addition to TRex-BCBL1-RTA cells is sufficient to induce lytic reactivation, which  
177 proceeds more rapidly than the iSLK.219 cells, with the virions released at 48 hpi as opposed to  
178 96 hpi. Using an assay to detect DNase-protected KSHV genomes in the cell supernatant by  
179 quantitative PCR, we measured very few viral particles in the cell supernatant at 24 hpi, which  
180 greatly increased by 48 hpi (Fig 2C). Torin treatment at 0 hpi completely inhibited release of  
181 DNase-protected genomes from TRex-BCBL1-RTA cells, but delay of Torin treatment to 24 hpi  
182 allowed the assembly and release of approximately 50% as many viral particles as vehicle  
183 control-treated cells. These results indicate that, similar to iSLK.219 cells, virion release from  
184 TRex-BCBL1-RTA cells was resistant to Torin treatment once virus replication has begun.

185         We next developed a *de novo* infection model to determine whether Torin resistance  
186 during KSHV lytic replication requires prior latent infection. The iSLK.219 cells and TRex-  
187 BCBL1-RTA cells work on the basis of a dox-regulated expression of the immediate early gene  
188 *RTA*. We previously observed that *de novo* infection of iSLK cells, which contain a dox-  
189 regulated *RTA*, can bypass latency and progress to lytic replication (and generate lytic foci) if the  
190 cells are first treated with dox to induce *RTA* expression (data not shown). This is similar to a  
191 previous report of lytic foci formed by infection of cells with KSHV-lyt, a BAC36-based  
192 recombinant virus that constitutively expresses RTA [37]. We induced RTA expression in  
193 uninfected monolayers of iSLK cells with dox for 24 hours prior to infecting the cells with  
194 rKSHV.219. The inoculum was removed and replaced with fresh media containing dox. Torin or  
195 vehicle was then added to the cells either immediately after recovery or at 24 hours after *de novo*

196 infection. At 96 h after infection, cell supernatants were harvested and virions were titered by  
197 FACS, as described above. We observed that Torin treatment at either 0 or 24 h following *de*  
198 *novo* infection potently inhibited virion release, suggesting a role for latency in setting the stage  
199 for mTOR-independent viral lytic replication (Fig 2D).

200

## 201 **mTOR activity is dispensable for global new protein synthesis during KSHV lytic** 202 **replication**

203 Host shutoff is a feature of KSHV lytic replication whereby global synthesis of host proteins is  
204 inhibited, largely by the viral host shutoff endonuclease SOX [38,39]. Host shutoff limits the  
205 ability of the host cell to restrict virus infection and may improve access of viral mRNAs to the  
206 host protein synthesis machinery. The requirement for mTOR-mediated eIF4F assembly for  
207 global protein synthesis during KSHV lytic replication is unknown. To address this directly, we  
208 employed the relatively efficient TRex-BCBL1-RTA cell model, and treated cells with dox and  
209 TPA to ensure efficient lytic reactivation. At 10 min prior to harvest, 10 µg/mL puromycin was  
210 added to these cells to measure new protein synthesis; puromycin resembles charged tyrosyl-  
211 tRNA and is incorporated at the carboxy-terminus of nascent polypeptide chains, thereby  
212 preventing elongation. As the amount of puromycin incorporation is directly proportional to the  
213 quantity of mRNAs undergoing active translation, detection of puromycin by immunoblotting  
214 can be used as a proxy for global protein synthesis [40]. We observed the highest puromycin  
215 incorporation into newly synthesized proteins in latently infected cells (Fig 3A and 3B, Lane 1);  
216 incorporation was reduced by more than 50% by 12 hpi and approximately 90% by 24 hpi,  
217 consistent with previous reports of host shutoff during the KSHV lytic cycle [25]. In this assay,  
218 sodium arsenite served as a potent positive control for translation inhibition; treatment of cells

219 with sodium arsenite for 10 min prior to the addition of puromycin (20 min prior to harvest)  
220 caused eIF2 $\alpha$  phosphorylation and largely ablated puromycin incorporation. There was a  
221 comparable loss of global protein synthesis in all sodium arsenite treated cells. Treatment with  
222 Torin caused a significant loss of 60% of global protein synthesis during latency (Fig 3A and 3B,  
223 lane 2) but did not significantly reduce global protein synthesis during lytic replication at 12 hpi  
224 or 24 hpi (Fig 3A and 3B, Lane 5 and 8) beyond the already diminished rate. Importantly, we  
225 observed that Torin completely inhibited mTOR-mediated phosphorylation of 4E-BP1 in both  
226 latent and lytic cells (Fig 3A and 3B, Lanes 2, 5, and 8), indicating that the residual global  
227 protein synthesis in cells experiencing host shutoff is resistant to 4E-binding proteins, which  
228 would normally be expected to efficiently suppress cap-dependent translation. Together, these  
229 data suggest that there is a reduced dependence on mTORC1 for protein synthesis in lytic cells.

230

### 231 **mTOR inhibition does not affect translational efficiency of viral mRNAs**

232 In response to nutrient stress or pharmacologic inhibition, mTORC1 inactivation prevents eIF4F  
233 assembly, which would be expected to broadly inhibit cap-dependent protein synthesis; however,  
234 studies of mTORC1 inhibitors in cancer cells have shown that the regulation of mRNA  
235 translational efficiency (TE) is complex. For example, select mRNAs bearing terminal  
236 oligopyrimidine (TOP) sequences [27] or PRTE sequences [28] at their 5' ends are most sensitive  
237 to mTORC1 inhibition, whereas other mRNAs can be more efficiently translated for unknown  
238 reasons. We used polysome analysis followed by RNA-Seq, also known as Pol-Seq, to determine  
239 whether mTORC1 inhibition affects the TE of viral mRNAs. In these experiments, we  
240 reactivated iSLK.219 with dox only in an attempt to limit other stresses on the cell. As  
241 mentioned above, under these conditions many of the iSLK.219 cells do not enter lytic

242 replication and instead do not reactivate or undergo an abortive replication; thus, dox treatment  
243 renders a mixed population of lytic and non-lytic cells. We observed that Torin treatment of  
244 latent iSLK.219 cells for 2 h prior to harvest resulted in a substantial shift of mRNAs from the  
245 well-translated heavy polysomes to the poorly-translated sub-polysomal fractions (Fig 4A),  
246 consistent with our previous observations of diminished rates of global protein synthesis in the  
247 TRex-BCBL-RTA model (Fig 3A, lane 2). Similarly, by 48 hpi, we observed a substantial  
248 decrease in the mRNAs associated with the polysome fractions in lytic cells compared to latently  
249 infected cells (Fig 4A), consistent with the actions of SOX [41]. Addition of Torin the 48 hpi  
250 population for 2 h prior to harvest resulted in further shift of mRNA to sub-polysomal fractions.  
251 We isolated mRNA from the polysomes of 48 hpi cells treated with either Torin or vehicle  
252 control for 2 h, and total RNA from these populations from two independent biological  
253 replicates, which were subjected to sequencing by Ion Torrent. We mapped reads on a per-  
254 transcript basis using the Hg19 build of the human genome concatenated to the KSHV genome  
255 from JSC-1 cells; this is the parental virus strain of the rKSHV.219 cell line [31,32] that we  
256 manually re-annotated with the transcript information from KSHV2.0 [42]. We assessed TE by  
257 simple division of the number of reads isolated from the polysomes compared to the reads found  
258 in the total RNA fraction ( $\#reads\ polysome / \#reads\ total$ ). Consistent with the literature, we  
259 observed alterations in TE of cellular mRNAs in the presence of Torin, with populations of  
260 mRNAs displaying increased or decreased TE (Fig 4B). We scored the difference in translational  
261 efficiencies by using a sliding-window to calculate a Z-score of each detected transcript  
262 compared to the surrounding 200 transcripts of similar abundance as measured by count per  
263 million (CPM). The  $\Delta TE$  of the majority of viral mRNAs (~90%) was not inhibited or enhanced  
264 by a conservative Z-score of 1 (Fig 4C, Z-score within 1 SD of the mean in blue, Z-score > 1 SD

265 of the mean in red), suggesting that the translational efficiencies of viral transcripts are not  
266 regulated by the mTORC1/4E-BP/eIF4F axis.

267 We confirmed these findings in the TRex-BCBL1-RTA cell model by assessing the  
268 distribution of host and viral mRNAs in the polysomal and sub-polysomal fractions reactivated  
269 with 1  $\mu\text{g}/\text{mL}$  dox for 24 h. Consistent with our observations in the iSLK.219 model (Fig 4A),  
270 we observed that Torin treatment of lytic TRex-BCBL1-RTA cells for 2 h prior to harvest  
271 resulted in a moderate shift of global mRNAs from polysomes to the sub-polysomal fractions  
272 (Fig 5A). We harvested mRNA from polysome, monosome (80S), and sub-monomer fractions  
273 (unbound RNA, 40S, and 60S), and performed RT-qPCR on select mRNAs as an alternative  
274 measure of TE. In these conditions we observed a large shift of  $\beta$ -actin mRNA from heavy  
275 polysomes to the monosome and sub-monomer fractions (Fig 5B); however, a significant  
276 proportion of translating  $\beta$ -actin mRNA remained in the polysome fractions despite Torin  
277 treatment. In contrast, Torin treatment caused the TOP-mRNA Rps20 to completely shift from  
278 the polysome fractions to monosome and sub-monomer fractions. VEGF-A and IL-6, two  
279 cytokines with significant contributions to Kaposi's sarcoma pathogenesis [22,43,44] were  
280 abundant in the monosome fraction in both vehicle control and Torin-treated cells. The  
281 monosome fraction was long thought to make insignificant contributions to global protein  
282 synthesis, but recent ribosomal foot-printing studies have revealed that monosomes contain  
283 translationally active mRNAs, especially those with short open reading frames (ORFs), up-  
284 stream ORFs, and mRNAs with low initiation rates [45]. Thus, our findings suggest that key  
285 pathogenic host cytokines are normally translated in monosomes or light polysomes and Torin  
286 treatment does not displace these mRNAs from the monosomes.

287 Finally, we measured viral mRNAs from three transcriptional classes, latent (LANA),  
288 early (ORF57 and ORF45) or late (ORF26, K8.1, ORF65, and K12). With Torin treatment, all  
289 classes of viral mRNAs shift from lighter polysomes accumulate in the monosome fraction, but  
290 much of the mRNA is retained in the light and heavy polysome fractions, demonstrating that  
291 mTORC1 activity is largely dispensable for translation of these viral messages. These data also  
292 suggest that monosomes may have a previously unappreciated role in the synthesis of  
293 herpesvirus proteins.

294

### 295 **mTOR inhibition during lytic replication disrupts eIF4F assembly**

296 mTORC1 primarily regulates translation initiation by preventing assembly of the eIF4F initiation  
297 complex. When hypophosphorylated, 4E-BP1 can bind to the eIF4E cap-binding protein, which  
298 prevents recruitment of the eIF4G scaffolding protein. mTORC1-mediated phosphorylation of  
299 4E-BP1 enables eIF4F assembly and subsequent recruitment of the eIF3 complex and the small  
300 ribosomal subunit [15,16]. mTORC1 activity during KSHV replication was previously shown to  
301 enable the assembly of eIF4F [25]. To further examine the role of mTORC1 activity on eIF4F  
302 regulation during lytic replication we performed m<sup>7</sup>GTP Sepharose bead pull-downs in native  
303 lysates from both latent and reactivated iSLK.219 cell and TRex-BCBL1-RTA cell models, and  
304 probed for assembly of canonical and alternative eIF4F constituent proteins in the presence or  
305 absence of mTORC1 inhibition with Torin. eIF4G1 and eIF4G3 were co-captured on m<sup>7</sup>GTP  
306 Sepharose beads with eIF4E1 and eIF4E2 cap-binding proteins from latent and lytic iSLK.219  
307 lysates (Fig 6A), suggesting the potential for formation of canonical and non-canonical eIF4F  
308 complexes at all stages of viral replication. eIF4G1 and eIF4G3 were depleted from these  
309 complexes when cells were treated with Torin for 2 h prior to harvest, while there was a

310 reciprocal increase in unphosphorylated 4E-BP1 detected in the pulldowns (Fig 6A, lanes 4, 6,  
311 8). Interestingly, we observed a marked increase in binding of eIF4E2 to the m<sup>7</sup>GTP Sepharose  
312 beads as the lytic cycle progressed, but this did not aid recruitment of eIF4G3 in the presence of  
313 Torin (Fig 6A, lanes 4-8). Together, these data confirm that eIF4F can indeed be disrupted by  
314 mTORC1 inhibition during the lytic cycle.

315         To investigate the effects of long-term mTORC1 inhibition in this model, we treated lytic  
316 iSLK.219 cells with Torin at 24 hpi and harvested lysates for m<sup>7</sup>GTP Sepharose bead pulldown  
317 at 48 hpi. Similar to the 2 h Torin treatments shown in Fig 6A, 24 h of sustained mTORC1  
318 inhibition during lytic replication also impaired eIF4F assembly (Fig 6B), while selectively  
319 inhibiting the accumulation of total eIF4G1 and eIF4E2 proteins. We corroborated these findings  
320 in the TRex-BCBL1-RTA cell model; treatment of latent or lytic cells with Torin for 2 h prior to  
321 lysate harvest completely inhibited eIF4F assembly by allowing unphosphorylated 4E-BP1 to  
322 block recruitment of eIF4G1 or eIF4G3 to eIF4E1/eIF4E2 proteins (Fig 6C). It is important to  
323 note that there is a limitation to the experiments described in Fig 6; as the bait is an analogue of  
324 the mRNA cap, the m<sup>7</sup>GTP Sepharose bead pulldown assay should only detect free eIF4F  
325 complexes that are not already bound to mRNA in the lysate. Thus, it is possible that viral  
326 mRNPs retain intact eIF4F in these lysates, making them exempt from regulation by 4E-BP1;  
327 however, long-term Torin treatments shown in Fig 1 and Fig 2, which began during early  
328 replication and proceeded to late replication, permitted efficient synthesis of viral late proteins  
329 and release of infectious virions, respectively. Taken together, these data suggest that in Torin-  
330 treated lytic cells the translation of late viral mRNAs is efficiently initiated and translated under  
331 conditions where eIF4F is depleted. This suggests that either viral mRNAs can efficiently

332 scavenge the remaining residual pool of eIF4F in the cell, or that initiation of these transcripts  
333 can be accomplished independently of intact eIF4F.

334

### 335 **mTORC1 inhibition alters the composition of mRNPs in polysomes**

336 We assessed the protein composition of mRNPs in polysomes in latent or lytic TRex-BCBL-  
337 RTA cells by immunoblotting for proteins harvested from several polysome fractions. We  
338 elected to use a low-salt lysis buffer in these experiments to aid retention of eIF4F components  
339 and other RNA binding proteins, consistent with previous ribosome isolation protocols [46,47].  
340 We isolated fractions containing the 40S, 60S, and 80S sub-polysomal peaks, as well as light and  
341 heavy polysomes. RNA and associated proteins were precipitated using ethanol and a glycogen  
342 co-precipitant. We found that the m<sup>7</sup>GTP cap-binding proteins eIF4E1, eIF4E2, and NCBP80  
343 were associated with polysomes in all conditions tested (Fig 7). Inhibition of mTORC1 with  
344 Torin leads to a progressive loss of eIF4F components eIF4G1 and eIF4G3 from polysomal  
345 fractions, consistent with the displacement of eIF4G from the eIF4F complex by  
346 hypophosphorylated 4E-BP1. However, eIF4G2, which was found primarily in the 80S  
347 monosome peak and sub-monosomal fractions, was unaffected by mTORC1 inhibition. eIF4G2  
348 does not contain an N-terminal domain required for association with eIF4E1 and is thought to be  
349 involved in cap-independent translation mechanisms [48,49]. We noted a clear accumulation of a  
350 faster migrating species of eIF4G1 that matches a previously reported caspase-3 cleavage  
351 fragment [50] consistent with induction of apoptosis in this population of cells [51]. Hyper-  
352 phosphorylated 4E-BP1 was associated with polysomes in vehicle-treated samples, consistent  
353 with other reports of 4E-binding proteins co-sedimenting with polysome fractions [52].  
354 Hypophosphorylated 4E-BP1 was found in sub-polysomal fractions of Torin-treated cells in both



355 the latent and lytic cell populations. We interpret this finding as dynamic disassembly of eIF4F  
356 on mRNA in polysomes allowing opportunistic binding of 4E-BP1 to eIF4E [14]. Finally,  
357 consistent with previous reports [12], we observed ORF57 association with mRNPs in  
358 polysomes, which was impervious to mTORC1 inhibition. Taken together, these findings  
359 indicate that mTORC1 is active during lytic replication and eIF4F is assembled, but also that  
360 synthesis of viral proteins has a limited requirement for eIF4F, and there is remodelling of  
361 polysome- and monosome-associated mRNP complexes during lytic replication.

362

## 363 **Discussion**

364 The seminal discovery that rapamycin (aka sirolimus) treatment causes regression of iatrogenic  
365 Kaposi's sarcoma (KS) lesions suggests a central role for mTORC1 in KSHV biology [20].  
366 mTORC1 activity has since been shown to be required for pro-inflammatory signalling in KS  
367 models [22,43,44]. Here we directly assessed the role of mTORC1 and the eIF4F complex in the  
368 translation of KSHV mRNA. mTORC1 was required for reactivation from latency, consistent  
369 with previous findings that rapamycin treatment caused diminished RTA transcript and protein  
370 accumulation in the BCBL-1 PEL cell line [53]; however, once early replication was established  
371 in these cells the requirement for mTORC1 was greatly reduced, as genome replication and  
372 virion production proceeded normally when mTORC1 is inhibited by Torin. Importantly, we  
373 demonstrated that late viral mRNA can accumulate normally (Fig 1C) and can be initiated for  
374 translation (Fig 4, 5B) when Torin is applied during early replication. Furthermore, these late  
375 transcripts are efficiently translated despite being first transcribed under conditions where eIF4F  
376 is disassembled and unavailable (Fig 6B, 7), and generate sufficient protein to produce infectious

377 virions (Fig 1B, 2). This suggests that while mTORC1 is active during lytic replication, it is  
378 dispensable for translation of viral mRNA.

379         During lytic replication we observed a change in global protein synthesis consistent with  
380 host-shutoff and the need for viruses to prioritize translation of viral mRNA during infection. We  
381 found that mTORC1 inhibition in the low-translation lytic environment had minimal effect on  
382 the overall translational output of the cell (Figs. 3, 4A). The loss of ~60% of global protein  
383 synthesis with Torin treatment of latently infected cells is consistent with other studies in  
384 uninfected cells [27,28]. It is becoming clear that the remaining mTORC1-independent protein  
385 synthesis in these systems involves non-eIF4F initiation systems. Recently, N<sup>6</sup>-methyladenosine  
386 (m<sup>6</sup>A) dependent translation initiation has been shown to contribute to residual translation  
387 following eIF4F disassembly in normoxia [54], whereas during hypoxia eIF4E2 and eIF4G3  
388 form an alternative eIF4F complex required for nearly all translation [55,56]; however, we  
389 observed a clear loss of eIF4G3 from polysomes following Torin treatment (Fig 7), suggesting  
390 that KSHV is probably not co-opting alternative hypoxic translation initiation complexes.  
391 Several studies have reported m<sup>6</sup>A modification of KSHV mRNAs, and m<sup>6</sup>A modification of  
392 RTA is required for proper splicing [57-59]; however, for the most part precise roles for m<sup>6</sup>A  
393 modifications and m<sup>6</sup>A reader proteins in the biogenesis and fate of KSHV mRNAs remain to be  
394 discovered, and may be dependent on cell type and different chemical stimuli of lytic  
395 reactivation [57].

396         mRNA translational efficiency is governed by *cis*-acting sequences and RNA-binding  
397 proteins. For example, ribosomal proteins are strongly down-regulated by mTORC1 inhibition,  
398 consistent with our observations shown in Figure 5B, due to both loss of eIF4F-dependent  
399 initiation and binding of LARP1 to a 5'-m<sup>7</sup>G-cap-proximal TOP sequence [27,60-62]. We note

400 that the identified transcription start-sites for KSHV mRNAs generally lack TOP or PRTE  
401 sequences, which suggests that their translation might not be especially susceptible to mTORC1  
402 inhibition. In our experiments, Torin treatments caused a global change in translational  
403 efficiencies (Fig 4), but the TE of viral transcripts remained similar to vehicle control,  
404 demonstrating that mTORC1 is not required for efficient synthesis of viral proteins. These  
405 observations are consistent with reports from Lenarcic, et. al. (2014), who demonstrated that  
406 mTORC1 is dispensable for HCMV late protein synthesis and that TE of viral mRNAs was  
407 minimally affected by Torin [63]. Together, these reports suggest that resistance to eIF4F loss  
408 might be a general feature of herpesvirus translation, even for viruses like HCMV that do not  
409 shut off host gene expression.

410 Our Pol-Seq analysis was restricted to actively-translating heavy polysomes, but light  
411 polysomes and monosomes also make important contributions to global protein synthesis [45].  
412 We extended and confirmed our Pol-Seq data by measuring the distribution of pathogenic  
413 cytokines and a panel of viral transcripts. For many of the viral transcripts, we observed a  
414 consistent distribution in the heaviest polysome fractions (fractions 9 and 10), and thereby most  
415 translationally active, irrespective of Torin treatment. Viral transcripts were also observed to  
416 shift from the light fractions to the lighter monosome fractions in response to Torin but did not  
417 sediment in sub-polysomal fractions. We were surprised to see abundant IL-6 and VEGFA  
418 mRNAs accumulate in the monosome fraction with little material present in the heavy polysome  
419 fractions. Monosomes are enriched for short transcripts (ORF length < 590 nt) and IL-6  
420 approaches this limit (639 nt CDS, Accession NM\_000600.4) [44]. IL-6 contains several  
421 upstream start codons, but does not appear to encode any uORFs. VEGFA is twice the length of  
422 average ORFs found in monosomes (1239 nt CDS, Accession NM\_001025366.2), but its

423 translation is regulated by a complex arrangement of two internal-ribosomal entry sites, near-  
424 cognate start codons, and uORFs, likely accounting for its inefficient initiation (reviewed in  
425 [64]).

426 Inhibition of mTORC1 during lytic replication leads to disassembly of eIF4G from the  
427 cap-binding eIF4E (Figs. 6, 7). We could observe this disassembly both in a cap-analogue  
428 pulldown experiments (Fig 6) and through displacement of eIF4G1 and eIF4G3 from lytic  
429 polysomes without loss of cap-binding proteins (eIF4E1, eIF4E2, NCBP) and no change in  
430 eIF4G2, a homologue of eIF4G that lacks the N-terminal eIF4E binding domain (Fig 7). Our  
431 data is consistent with destabilization of eIF4G association with eIF4E on cap binding and  
432 dynamic disassembly of eIF4F after initiation, as hypothesized by Merrick, 2015 [14]. eIF4E  
433 appears to remain associated with the cap of the polysomal mRNA, allowing a surface for  
434 interaction with either eIF4G, or a 4E-BP1 protein that would prevent additional eIF4G  
435 association and subsequent rounds of eIF4F-dependent initiation. We hypothesize that the  
436 presence of hyper-phosphorylated 4E-BP1 in vehicle-treated polysomes is due to low affinity  
437 binding of 4E-BP1 to the eIF4E; high affinity binding of hypo-phosphorylated 4E-BP causes  
438 rapid loss of initiation on these mRNAs and their subsequent shift to sub-polysomal fractions.  
439 KSHV lytic proteins have been shown to activate mTORC1, which should promote assembly of  
440 eIF4F by displacing 4E-BP1. However, the rapid disassembly of free eIF4F and displacement of  
441 eIF4G from polysomes upon Torin treatment during all stages of KSHV infection suggests that  
442 KSHV gene products only enforce eIF4F-dependent translation upstream of mTORC1 and have  
443 no downstream mechanism to sustain eIF4F assembly.

444 During Torin treatment, both the TOP-containing transcript Rps20 and the non-TOP  $\beta$ -  
445 actin transcript were depleted from polysome fractions that retained viral mRNAs (Fig 5B). In

446 these same fractions eIF4G1 and eIFG3 are also lost, but ORF57 is retained. ORF57 and related  
447 herpesvirus homologues (EBV EB2, HSV1/2 ICP27) have previously been shown to interact  
448 with translation initiation factors, and could be found in polysomes [65,66]. Ectopically  
449 expressed ORF57 co-immunoprecipitates with 48S components [12] and co-sediments in  
450 polysomes without viral mRNA present (unpublished observations). Both EB2 and ICP27  
451 associate with PABP, which can further recruit eIF4G. This is likely responsible for the  
452 phenomena of 3'UTR tethering of ICP27 and EB2 and enhanced translation of reporter luciferase  
453 mRNA in *in vitro* assays [67,68]. Tethering ICP27 is also sufficient to promote translation of  
454 uncapped, non-polyadenylated RNA [69]. Ectopic expression of ORF57, EB2, or ICP27 do not  
455 globally enhance protein synthesis, but they do enhance translation of non-spliced RNA, partially  
456 through enhanced mRNA nuclear export [70]. In our experiments, loss of eIF4G from polysomes  
457 upon Torin treatment suggests that ORF57-dependent recruitment of eIF4G to viral mRNAs is  
458 not required for their translation, yet ORF57 is clearly present in the same fractions as viral  
459 mRNA and is not displaced with eIF4F loss. It is possible that other KSHV proteins may  
460 associate with polysomes. Other groups have made important progress in this area by identifying  
461 several viral proteins using an oligo-dT purification of HCMV-infected cells followed by LC-  
462 MS/MS [71]. Their approach used high-salt washes for increased stringency; however, as high-  
463 salt can dissociate canonical translation initiation factors, there remains the likelihood that more  
464 viral RNA-binding proteins remain to be identified.

465       If mTORC1 is active during lytic replication and is not required for translation of viral  
466 mRNA, then why is it active? mTORC1-dependent phosphorylation impacts many cellular  
467 processes and any of these could require regulation by the virus. In our virus titering  
468 experiments, we observed production of infectious virions following Torin treatment, but to a

469 lesser extent than the vehicle control. If translation of viral mRNAs is not inhibited, it is possible  
470 that eIF4F-dependent translation of cellular proteins is required for optimal virus replication or  
471 for spread *in vivo*. Our experiments also take place at normal atmospheric oxygen levels,  
472 whereas in the human host KSHV resides and replicates in compartments with a lower oxygen  
473 tension. Under these physiological oxygen conditions, eIF4E1- and eIF4E2-dependent  
474 translation are both active [72]. Enforcing eIF4E1-dependent translation under these  
475 circumstances might be important for replication. mTORC1 inhibition activates autophagy  
476 through loss of ULK1 phosphorylation at Ser757 [73]. Suppression of mTORC1 by Torin  
477 treatment could lead to induction of autophagy in our system and reduce accumulation of  
478 infectious virions. At least three KSHV proteins modulate autophagy, vFLIP, K7, and vBcl2  
479 (reviewed in [74]), suggesting that autophagy is an important regulator of virus infection.  
480 Activation of mTORC1 by vGPCR, K1, and ORF45 might also suppress autophagy induction.  
481 mTORC1 activity could also be important for KSHV to maintain “normal” contacts with other  
482 immune cells or for the production of cytokines during establishment of latency.  
483 Gammaherpesvirus latency in distinct niches of the B cell compartment requires emulation or  
484 stimulation of a germinal centre reaction [75]. Rapamycin was recently shown to inhibit normal  
485 germinal centre reactions [76,77]. Together, these findings suggest that mTORC1 activity may  
486 be required for proper establishment of the latently infected B cell compartment *in vivo*. Given  
487 the lack of immunocompetent animal models for KSHV, the role of mTORC1 for establishing  
488 gammaherpesvirus latency might best be elucidated in murine gammaherpesvirus 68 models of  
489 infection.

490 Here, our data suggests that while mTORC1 is active during KSHV lytic replication and is  
491 likely important for the virus life cycle, it is not required for the translation of viral mRNA. More

492 generally, during lytic replication the global protein synthesis remaining is resistant to eIF4F  
493 disassembly. This suggests that viral transcripts can access alternative translation initiation  
494 machinery during lytic replication. Whether this machinery is accessed from the host translation  
495 repertoire or encoded within the viral genome remains to be determined.

496

## 497 **Materials and Methods**

### 498 **Cell lines**

499 HEK293A (293A) (ATCC), and iSLK and iSLK.219 cells (a gift from Don Ganem [31]) were  
500 cultured in DMEM with 10% heat-inactivated FBS with 100 IU of each penicillin and  
501 streptomycin. Trex-BCBL1-RTA cells (a gift from Jae Jung [36]) were cultured in RPMI-1640  
502 supplemented with 10% heat-inactivated FBS, 500  $\mu$ M  $\beta$ -mercaptoethanol, with 100 IU of each  
503 penicillin and streptomycin. All cells were maintained at 37°C with 5% CO<sub>2</sub> atmosphere. Cells  
504 were regularly assessed for mycoplasma DAPI staining and fluorescent microscopy. iSLK.219  
505 cells were cultured in the presence of 10  $\mu$ g/mL of puromycin (Invitrogen) to maintain copy  
506 number of the episomal rKSHV.219 genomes [31,32]. Puromycin was not included in the media  
507 of cells seeded for experiments. iSLK.219 cells were diluted to a density of 10<sup>5</sup> cells/mL for  
508 seeding in all experiments. To induce RTA transgene expression in iSLK.219 cells, on the day  
509 following seeding medium was refreshed and supplemented with 1  $\mu$ g/mL doxycycline (dox,  
510 Sigma). Trex-BCBL1-RTA cells were resuspended at a density of 2.5x10<sup>5</sup> cells/mL  
511 supplemented with 1  $\mu$ g/mL dox or 1  $\mu$ g/mL dox with 20 ng/mL 12-O-Tetradecanoylphorbol-13-  
512 acetate (TPA, Sigma) to induce RTA transgene expression.

513

### 514 **Chemical inhibitors**

515 Torin 1, referred to as “Torin” here, (Toronto Research Chemicals) [34] and Rapamycin (Sigma)  
516 were resuspended in DMSO, which was used as a vehicle control in all experiments at 0.1% v/v.  
517 Rapamycin and Torin were both used at a concentration of 250 nM. Phosphonoacetic acid and  
518 arsenic oxide were purchased from Sigma. Phosphonoacetic acid was used at a concentration of  
519 500  $\mu$ M.

520

### 521 **Fluorescent imaging and counting**

522 iSLK.219 cells were seeded in a 6-well plate and fixed with 4% paraformaldehyde for 15  
523 minutes at room temperature and the nuclei were stained with Hoechst 33342 (Invitrogen).  
524 Fluorescent images were captured using an EVOS FL Cell Imaging System (ThermoFisher) and  
525 RFP+ cells and Hoechst+ cells were counted using a custom CellProfiler ver 3.0.0 script [78].

526

### 527 **Immunoblotting**

528 Cells were washed with ice-cold PBS and harvested in 2x Laemmli Buffer. The protein  
529 concentration of whole cell lysates was quantified by DC protein assay (Bio-Rad) and equal  
530 quantities of protein were loaded for SDS-PAGE and transferred to PVDF membranes (Bio-  
531 Rad). For proteins isolated from pulldowns or precipitated from polysome fractions, equal  
532 volumes of lysate were loaded. Membranes were blocked with 5% skim milk-Tris-buffered-  
533 saline-0.1% Tween (ThermoFisher) (TBS-T), or 5% bovine serum albumin (BSA) TBS-T, and  
534 probed at 4°C overnight with the following primary antibodies: S6 (Cell Signaling; #2217), pS6  
535 (Ser235/236, Cell Signaling #4858), Puromycin (clone 12D10, EMD Millipore; MABE343MB),  
536 eIF2 $\alpha$  (Cell Signaling; #9722), phospho-eIF2 $\alpha$  (Ser51, Cell Signaling; #3597), 4E-BP1  
537 (Cell Signaling; #9644), eIF4E (Cell Signaling; #2067), eIF4G1 (Cell Signaling; #2858), eIF4G3



538 (GeneTex; GTX118109), eIF4E2 (GeneTex; GTX103977), NCBP80 (Abcam),  $\beta$ -actin (Cell  
539 Signaling; #5125), RTA (a kind gift from David Lukac), ORF45 (Thermo-Fisher; MA5-14769),  
540 ORF57 (Santa Cruz; sc135746), K8.1 (clone 4A4, ABI; 13-212-100), LANA (a kind gift from  
541 Don Ganem), and ORF65 (a kind gift from Jae Jung). Primary antibody was detected with  
542 horseradish-peroxidase conjugated anti-mouse (Cell Signaling; #7076) and anti-rabbit (Cell  
543 Signaling; #7074) secondary antibodies. Blots were developed with Clarity-ECL  
544 chemiluminescence reagent (Bio-Rad) and imaged on a Bio-Rad Chemidoc-Touch.

545

#### 546 **Viral genome amplification and qRT-PCR**

547 DNA was harvested from the cells using QIAamp DNA Mini Kit (Qiagen) as per the  
548 manufacturers' directions. qPCR was performed with primers to ORF26 and  $\beta$ -actin GoTaq  
549 qPCR Master Mix (Promega). KSHV genome copy number is represented as fold excess of  
550 ORF26 over  $\beta$ -actin. For qRT-PCR, total RNA was extracted using the RNeasy Plus Kit  
551 extraction (Qiagen), reverse transcribed using MaximaH (ThermoFisher) using random hexamers  
552 for priming as per the manufactures' directions. qPCR was performed using GoTaq. Both  
553 adherent and non-adherent cells were harvested in each sample. Transcripts were normalized to  
554 abundance of 18S rRNA using the  $\Delta\Delta Cq$  method. Primer sequences are in listed in S2 Table 2.

555

#### 556 **DNase-protected virion qPCR**

557 At the time of harvest, the cells and debris were pelleted for 5 min at 5000 x g. 180  $\mu$ L of the  
558 supernatant was treated with 300  $\mu$ g/mL DNase I (Sigma), for 30 min at 37°C. DNA was then  
559 extracted from the treated supernatant using DNeasy Blood and Tissue Minikit (Qiagen) as per  
560 the manufacturers' instructions with the following modifications: lysis buffer AL was

561 supplemented with 10 mg/sample of salmon sperm DNA (Invitrogen) and 1 ng of the luciferase  
562 (*luc2*) containing plasmid, pGL4.26 (Clontech). qPCR was performed with primers for ORF26 to  
563 detect viral genomes and the *luc* carrier plasmid using Go-Taq (Promega). ORF26 quantity was  
564 normalized to *luc2* using the  $\Delta\Delta Cq$  method.

565

### 566 **KSHV infection and titering**

567 rKSHV.219 contains an EGFP cassette under a constitutive EF1 $\alpha$  promoter, allowing for  
568 quantification by flow cytometry [32]. Supernatant was harvested from iSLK.219 cells as  
569 indicated and stored at -80°C until titering. One day prior to titering,  $2.5 \times 10^5$  293A cells were  
570 plated in each well of a 12 well plate. The thawed viral inoculum was mixed by inversion then  
571 centrifuged at 5000 x g for 5 min to pellet debris. The cells were then infected with diluted  
572 inoculum and centrifuged at 800 x g for 90-120 min [80]. Immediately after spinoculation, the  
573 inoculum was removed, the cells were washed once with PBS, and fresh media was added, and  
574 the cells were returned to an incubator. The day following infection, 293A cells were lifted with  
575 trypsin, washed once in cold PBS then resuspended in 1% paraformaldehyde PBS. GFP+ cells  
576 were recorded from 10 000 events in an arbitrary live FSC/SSC gate with a FACScalibur (BD  
577 Bioscience). Data was analysed using Flowing Software ver 2.5 (Perttu Terho, Turku Centre for  
578 Biotechnology, Finland. [www.flowingsoftware.com](http://www.flowingsoftware.com)).

579

### 580 **Puromycin Translation Assay**

581 TRex-BCBL1-RTA cells were treated with 10  $\mu\text{g/mL}$  puromycin for 10 min prior to harvest in  
582 2x Laemmli buffer. C-terminal puromycin was probed by western blot using an anti-puromycin  
583 antibody [40]. Western blots were performed on 4-15% Mini-PROTEAN TGX Stain-Free

584 gradient gels (Bio-Rad) as per the manufacturers' instructions. The Stain-Free total protein  
585 loading control was used to quantify the anti-puromycin signal.

586

### 587 **m<sup>7</sup>GTP pull-down**

588 2x10<sup>6</sup> iSLK, iSLK.219 cells, or 5x10<sup>6</sup> TRex-BCBL1-RTA cells were used for each pull-down.

589 After treatment with Torin or DMSO, cells were washed twice with ice-cold PBS and harvested.

590 The cells were centrifuged for 5 min at 1000 x g and the pellet was lysed, on ice for 10 min in

591 lysis buffer (20 mM Tris-HCl, 150 mM, NaCl, 0.5% NP-40 with protease and phosphatase

592 inhibitors). The lysates were centrifuged for 5 min at 10 000 g and the supernatant were pre-

593 cleared with 30 µL settled volume of unconjugated agarose beads (Jena Biosciences, Germany)

594 by incubating with end-over-end rotation, for 10 min at 4°C. The beads were pelleted by

595 centrifugation for 30 s at 500 x g and 50 µL of supernatant was removed as the 5% input control.

596 The remaining supernatant was incubated with m<sup>7</sup>GTP agarose beads (Jena Biosciences,

597 Germany) for 4-6 h at 4°C, with agitation. The beads were washed four times with lysis buffer.

598 The beads were then resuspended in 50 µL of 1x Laemmli buffer with 100 mM DTT and boiled

599 at 55°C for 10 min.

600

### 601 **Polysome analysis**

602 Polysomes were isolated by ultracentrifugation of cytosolic lysate through a 7-47% linear

603 sucrose gradient in high salt (20 mM Tris HCl, 300 mM NaCl, 25 mM MgCl<sub>2</sub> in DEPC-treated

604 or nuclease-free water, Fig 4 and 5) or low salt (15 mM Tris HCl, 50 mM KCl, 10 mM MgCl<sub>2</sub>

605 Fig 7) lysis buffer with RNase and protease inhibitors. High salt conditions were used to isolate

606 RNA from gradients and low salt conditions were used for isolating proteins. Gradients were

607 prepared using manufactures' settings on a Gradient Master 108 (Biocomp). For each gradient,  
608  $\sim 8 \times 10^6$  iSLK.219 or  $1.3 \times 10^7$  TRex-BCBL-RTA cells were seeded. Cells were treated with 100  
609  $\mu\text{g}/\text{mL}$  cycloheximide (CHX, Acros Organics or Sigma) for 3 min prior to harvest. Adherent and  
610 detached cells were washed and collected in ice-cold PBS. The cells were pelleted by  
611 centrifugation for 5 min at 500 x g and washed again with ice-cold PBS. Cell pellets were  
612 resuspended in lysis buffer (high or low salt buffer, with 1% Triton X-100, 400 U/ml  
613 RNaseOUT (Invitrogen), 100  $\mu\text{g}/\text{mL}$  CHX, and protease and phosphatase inhibitors) for 10 min  
614 on ice. Lysate was centrifuged for 10 min at 2 300 x g, the supernatant were transferred to a new  
615 tube and centrifuged for 10 min at 15 000 x g. The supernatant was overlaid on the sucrose  
616 gradients. Gradients were centrifuged at 39 000 rpm for 90 min on a SW-41 rotor. The bottom of  
617 the centrifuge tube was punctured and the gradient was underlaid with 60% sucrose by syringe  
618 pump to collect 1 mL fractions from the top of the gradient with simultaneous  $A_{260}$  measurement  
619 using a UA-6 detector (Brandel, MD). Polysome sedimentation graphs were generated with  
620 GraphPad Prism.

621

### 622 **RNA-Seq analysis of polysome fractions**

623 Total RNA or pooled fractions from heavy polysomes were isolated using Ribozol (Amresco)  
624 using standard procedures, except the precipitant in the aqueous fraction was isolated using an  
625 RNeasy column (QIAGEN). mRNA was isolated from these total fractions using polyA  
626 enrichment (Dynabeads mRNA DIRECT Micro Purification Kit, ThermoFisher) according to the  
627 manufacturers' protocol, then library preparation was performed with Ion Total RNA-Seq Kit  
628 v2.0 (ThermoFisher). Library size, concentration, and quality was assessed using a 2200  
629 TapeStation (Agilent). Libraries were sequenced on Proton sequencer (ThermoFisher Scientific)

630 with a PI chip and the Ion PI Hi-Q Sequencing 200 Kit for 520 flows. Ion Torrent reads were  
631 processed using combined Human Hg19 and KSHV (Accession GQ994935) reference  
632 transcriptomes. The KSHV genome was manually re-annotated with the transcript definitions  
633 from KSHV2.0 [42] reference transcriptome and the Quasi-Mapping software Salmon [80].  
634 Normalized counts per million (cpm) were estimated for individual transcripts using the R  
635 package limma [81]. Two biological replicates were combined as a geometric mean [82]. The  
636 transcripts were ordered by abundance and the mean, standard deviation (SD), and Z-score were  
637 calculated using a sliding window of 200 transcripts of similar abundance [82,83]. The most  
638 abundant 100 and the least abundant 100 transcripts used the mean and SD of the adjacent bin.  
639 Translational efficiency (TE) of a transcript treatment was determined by the formula  $TE =$   
640  $\log_2(\text{polysome/total})$ . The change in translational efficiency ( $\Delta TE$ ) =  $TE_{\text{Torin}} - TE_{\text{DMSO}}$ .

641

#### 642 **Polysome qRT-PCR**

643 Trex-BCBL1-RTA were reactivated with 1  $\mu\text{g/mL}$  dox for 24h. Torin or DMSO was added 2 h  
644 prior to harvest in high salt lysis buffer as described above. Fractions were mixed 1:1 with Trizol  
645 and isolated as per manufacturers' directions with the following exceptions: 30-60  $\mu\text{g}$  of  
646 GlycoBlue Co-Precipitant (Ambion) and 100 ng of *in vitro* transcribed luciferase DNA (NEB T7  
647 HiScribe) were added to the aqueous fractions during isopropanol precipitation. The resulting  
648 pellet was resuspended in nuclease-free water and reverse transcribed with MaximaH using  
649 random primers. mRNA was normalized to luciferase spike to control for recovery. The quantity  
650 of mRNA detected in a given fraction was then calculated as a percentage of the total detected in  
651 all fractions. The RNA recovery was controlled by subtracting the  $C_q$  of the luciferase spike,  
652 which was assumed to be constant, from the target  $C_q$ :  $\Delta Cq = Cq_{\text{target}} - Cq_{\text{luc}}$ . This  $\Delta Cq$  value for

653 each fraction was then subtracted from the lightest fraction:  $\Delta\Delta Cq_n = \Delta Cq_1 - \Delta Cq_n$  where  
654  $n$ =fraction number.  $\Delta\Delta Ct$  was then normalized into a transcript quantity,  $Q_n = 2^{\Delta\Delta Cq_n}$  for each  
655 transcript. The total quantity transcript ( $Q_{total}$ ) was summed from all fractions:  
656  $Q_{total} = Q_1 + Q_2 + Q_3 + \dots + Q_n$  and the proportion ( $P$ ) of a transcript found in a fraction was  
657 determined by  $P = Q_n / Q_{total}$  [84].

658

### 659 **Polysome immunoblot**

660 500  $\mu$ L fractions of sucrose gradient were mixed with 45  $\mu$ g of GlycoBlue and 1.5 mL of 100%  
661 ethanol and incubated overnight at  $-80^\circ\text{C}$ . Fractions were centrifuged at 15 000  $\times$  g for 15 min at  
662  $4^\circ\text{C}$ . Supernatants were decanted and the pellets were washed with 70% ethanol. Residual  
663 ethanol was air dried at  $95^\circ\text{C}$  and the pellet was resuspended in 1x Laemmli buffer with 100 mM  
664 DTT then boiled at  $95^\circ\text{C}$  for 5 min prior to analysis by SDS-PAGE.

665

### 666 **Statistical analysis**

667 We used Prism7 (GraphPad) to perform statistical analysis. Unpaired Student's t-tests were used  
668 to compare two groups. Two-way ANOVA was used compare between multiple groups with a  
669 post-hoc test to determine differences between groups.  $p$ -value  $<0.05$  were considered significant  
670 and indicated with (\*).

671

### 672 **Supporting Information**

673 **Table S1. Pol-Seq data.** (.xlsx) Transcript abundances in cpm and calculated TE are provided  
674 and Z-scores are provided. Raw data are deposited in NCBI.

675 **Table S2. Oligonucleotide sequences used in this study.** (.xlsx)

## 676 **Acknowledgements**

677 We thank members of the McCormick lab for critical reading of this manuscript. We would like  
678 to thank Don Ganem (Novartis), Jae Jung (USC), and David Lukac (Rutgers) for providing  
679 reagents.

680

## 681 **Figure Legends**

682 **Fig 1. mTOR is required for reactivation from latency, but not progression from early to**  
683 **late replication.** (A) iSLK.219 cells were treated with 1  $\mu\text{g}/\text{mL}$  doxycycline (dox) to induce  
684 lytic reactivation and harvested with 2x Laemmli buffer as indicated. DMSO, Torin, Rapamycin  
685 or phosphonoacetic acid (PAA) was added either at 0 or 24 hpi. Samples were probed by western  
686 blot as indicated. (B) Left. DNA was extracted from iSLK.219 cells at indicated times and the  
687 relative proportion of KSHV genome to human genomic DNA was determined by comparing the  
688 proportion of ORF26 to  $\beta$ -actin by qPCR.  $n=3 \pm \text{SEM}$ . Right. DNA was harvested from  
689 iSLK.219 cells at 72 hpi. Cells were treated as indicated at either 0 or 24 hpi.  $n=3 \pm \text{SEM}$ . (C).  
690 As in (B) except RNA was extracted and qRT-PCR performed for the late genes ORF26 and  
691 K8.1.  $n=4 \pm \text{SEM}$ . (D) iSLK.219 cells were treated with dox to induce lytic reactivation and  
692 treated with Torin or DMSO at 0 or 24 hpi. Cells were fixed with 4% paraformaldehyde and  
693 nuclei were stained with Hoechst. RFP+ cells and nuclei were imaged on an inverted fluorescent  
694 microscope and enumerated with CellProfiler.  $n=3 \pm \text{SD}$ . \* indicates p value  $< 0.05$  by t-test or  
695 one-way ANOVA.

696

697 **Fig 2. mTOR is not required for production of infectious virions after KSHV reactivation.**

698 (A) iSLK.219 cells were reactivated with dox. Cell supernatants were harvested at the times

699 indicated at stored at -80°C before further processing. Supernatants were cleared of debris by  
700 centrifugation (5000 x g) and used to infect monolayers of 293A cells. 24 h after infection, 293A  
701 cells were resuspended with trypsin and fixed with 1% paraformaldehyde. GFP+ cells from an  
702 arbitrary live-dead gate were recorded by flow cytometry. n=4, ±SEM. (B) As in (A) except  
703 Torin was DMSO were added to the media at the indicated times post reactivation. Supernatants  
704 were harvested at 96 hpi and titered as described in (A). (C) TRex-BCBL1-RTA cells were  
705 reactivated with 1 µg/mL dox. Torin or DMSO was added to the cells at 0 or 24 hpi. At 48 hpi,  
706 cells and debris were removed by centrifugation (5000 x g) and supernatants were stored at -  
707 80°C. Supernatants were treated with DNase I for 30 min at 37°C before DNA harvest in lysis  
708 buffer containing a salmon sperm carrier DNA and a luciferase-encoding plasmid. DNase-  
709 protected viral genomes were quantified with qPCR using luciferase DNA as a recovery control.  
710 n=5 ±SEM. (D). Uninfected iSLK cells were treated with 1 µg/mL dox for 24 h to induce RTA  
711 expression. These cells were infected with KSHV derived from iSLK.219 for 2 h. After  
712 infection, media was replaced with dox-containing media. Torin or DMSO was added to the  
713 refreshed wells at the end of infection or 24 h post-infection. 96 h post-infection, supernatant was  
714 removed and titered by infecting 293A as described in (A). n=4 ±SEM. \* indicates p value <  
715 0.05 by t-test or one-way ANOVA.

716

717 **Fig 3. Protein synthesis remaining after virus host shutoff is resistant to further mTOR**  
718 **inhibition.** (A) Trex-BCBL1-RTA cells were reactivated from latency with 1 µg/mL dox and 20  
719 ng/mL TPA. Cells were treated with Torin or DMSO for 2 h prior to harvest or with sodium  
720 arsenite for 20 min prior to harvest. All cells were pulsed with 10 µg/mL puromycin 10 min prior  
721 to harvest in 2x Laemmli buffer. Lysates were probed by western blot using antibodies as



722 indicated. Incorporation of puromycin in nascent polypeptide chains indicates the rate of protein  
723 synthesis as detected by probing with an anti-puromycin antibody. (B) The puromycin intensity  
724 in A was quantified and compared to the total protein load as described in Methods. Intensities  
725 were normalized to the latent, DMSO-treated cells (Lane 1). Lane numbers correspond to lanes  
726 reading left to right in A.  $n=4$ ,  $\pm$  SD. \* indicates  $p$  value  $< 0.05$  by one-way ANOVA.

727

728

729 **Fig 4. Effect of Torin treatment on translational efficiencies of viral mRNA.** (A) Polysome  
730 profiles of latent or 48 hpi iSLK.219 treated with either Torin or DMSO for 2 h prior to harvest.  
731 Cells were treated with 100  $\mu$ g/mL cycloheximide (CHX) for 5 minutes prior to harvest to  
732 prevent elongation. Cells were lysed in the presence of CHX and loaded on a 7-47% linear  
733 sucrose gradient. After separation by ultracentrifugation, the abundance of RNA ( $A_{260}$  nm) in the  
734 gradient was continually measure as fractions were collected. RNA from the 48 hpi polysome  
735 fractions was isolated for sequencing. (B) mRNA from translating ribosomes (of DMSO treated  
736 cells) was sequenced and aligned to both the human and KSHV genomes. Viral transcripts are  
737 depicted in blue on top of the grey background of cellular genes. The dashed line represents the  
738 mean TE of all transcripts. (C) The  $\Delta$ TE of viral transcripts is depicted in blue or read on a grey  
739 background of cellular genes. Viral transcripts beyond one SD of the mean are red, viral  
740 transcripts within one SD are depicted in blue. Vertical lines represent a 1.5-fold change in  
741 transcript TE.

742

743 **Fig 5. Distribution of viral and cellular mRNAs in polysome fractions.** (A) Polysome profile  
744 of TRex-BCBL1-RTA cells induced with 1  $\mu$ g/mL dox for 24 h. Torin or DMSO control were

745 added 2 h prior to harvest and polysome analysis. (B) qRT-PCR analysis of cellular and viral  
746 transcripts in polysome fractions. Total RNA was isolated from polysome fractions. RNA was  
747 co-precipitated with GlycoBlue and T7-transcribed luciferase RNA to improve and normalize for  
748 recovery. RNA was analysed by qRT-PCR for cellular, and viral transcripts. DMSO – black line,  
749 Torin – red line. Vertical lines depict the boundaries between the monosomes, light polysome,  
750 and heavy polysome fractions. Polysome fractions are depicted in grey. Mean of three  
751 independent biological replicates is shown.

752

753 **Fig 6. mTOR inhibition disrupts eIF4F formation during latency and lytic replication.**

754 (A) Uninfected iSLK cells, iSLK.219 during latency, 24, or 48 hpi were treated for 2h with Torin  
755 or DMSO and harvested at the indicated times. Cell lysates were incubated with m<sup>7</sup>GTP  
756 Sepharose, washed and eluted by boiling in 1x Laemmli buffer and analyzed by western blot. (B)  
757 As in (A), except iSLK.219 cells were treated with Torin or DMSO at 24 hpi prior to at 48 hpi  
758 harvest. (C) Latent or 24 hpi TRex-BCBL1-RTA cells treated and harvested as in (A).

759

760 **Fig 7. Association of translation initiation factors during viral latency and lytic replication.**

761 (A) TRex-BCBL-RTA cells at 24 hpi were treated with Torin or DMSO for 2 h prior to harvest.  
762 The indicated 40S, 60S, 80S, light, and heavy polysome fractions were precipitated with ethanol  
763 and glycogen. (B) Precipitate from polysome fractions in (A) were resuspended in 1x Laemmli  
764 buffer analysed by western blot as indicated.

765

766

767

768

## 769 References

- 770 1. Chang Y, Cesarman E, Pessin MS, Lee F, Culpepper J, Knowles DM, et al. Identification  
771 of herpesvirus-like DNA sequences in AIDS-associated Kaposi's sarcoma. *Science*.  
772 1994;266: 1865–1869.
- 773 2. Cesarman E, Chang Y, Moore PS, Said JW, Knowles DM. Kaposi's sarcoma-associated  
774 herpesvirus-like DNA sequences in AIDS-related body-cavity-based lymphomas. *N Engl*  
775 *J Med*. 1995;332: 1186–1191. doi:10.1056/NEJM199505043321802
- 776 3. Soulier J, Grollet L, Oksenhendler E, Cacoub P, Cazals-Hatem D, Babinet P, et al.  
777 Kaposi's sarcoma-associated herpesvirus-like DNA sequences in multicentric Castlemans  
778 disease. *Blood*. 1995;86: 1276–1280.
- 779 4. SUN R, Lin SF, Gradoville L, Yuan Y, Zhu F, Miller G. A viral gene that activates lytic  
780 cycle expression of Kaposi's sarcoma-associated herpesvirus. *Proc Natl Acad Sci USA*.  
781 1998;95: 10866–10871.
- 782 5. Lukac DM, Renne R, Kirshner JR, Ganem D. Reactivation of Kaposi's sarcoma-associated  
783 herpesvirus infection from latency by expression of the ORF 50 transactivator, a homolog  
784 of the EBV R protein. *Virology*. 1998;252: 304–312. doi:10.1006/viro.1998.9486
- 785 6. Liang Y, Chang J, Lynch SJ, Lukac DM, Ganem D. The lytic switch protein of KSHV  
786 activates gene expression via functional interaction with RBP-J $\kappa$  (CSL), the target of the  
787 Notch signaling pathway. *Genes & Development*. 2002;16: 1977–1989.  
788 doi:10.1101/gad.996502
- 789 7. Izumiya Y, Izumiya C, Hsia D, Ellison TJ, Luciw PA, Kung HJ. NF- $\kappa$ B Serves as a  
790 cellular sensor of Kaposi's Sarcoma-Associated Herpesvirus latency and negatively  
791 regulates K-Rta by antagonizing the RBP-J $\kappa$  coactivator. *Journal of Virology*. 2009;83:  
792 4435–4446. doi:10.1128/JVI.01999-08
- 793 8. Brulois K, Wong L-Y, Lee H-R, Sivadas P, Ensser A, Feng P, et al. Association of  
794 Kaposi's Sarcoma-Associated Herpesvirus ORF31 with ORF34 and ORF24 is critical for  
795 late gene expression. *Journal of Virology*. 2015;89: 6148–6154. doi:10.1128/JVI.00272-  
796 15
- 797 9. Davis ZH, Verschuere E, Jang GM, Kleffman K, Johnson JR, Park J, et al. Global  
798 mapping of Herpesvirus-host protein complexes reveals a transcription strategy for late  
799 genes. *Molecular Cell*. 2015;57: 1–12. doi:10.1016/j.molcel.2014.11.026
- 800 10. Davis ZH, Hesser CR, Park J, Glaunsinger BA. Interaction between ORF24 and ORF34 in  
801 the Kaposi's Sarcoma-Associated Herpesvirus late gene transcription factor complex is  
802 essential for viral late gene expression. *Journal of Virology*. 2015;90: 599–604.  
803 doi:10.1128/JVI.02157-15
- 804 11. Nishimura M, Watanabe T, Yagi S, Yamanaka T, Fujimuro M. Kaposi's sarcoma-

- 805 associated herpesvirus ORF34 is essential for late gene expression and virus production.  
806 *Scientific Reports*. 2017;7: 1–12. doi:10.1038/s41598-017-00401-7
- 807 12. Boyne JR, Jackson BR, Taylor A, Macnab SA, Whitehouse A. Kaposi's sarcoma-  
808 associated herpesvirus ORF57 protein interacts with PYM to enhance translation of viral  
809 intronless mRNAs. *The EMBO Journal*. Nature Publishing Group; 2010;29: 1851–1864.  
810 doi:10.1038/emboj.2010.77
- 811 13. Hinnebusch AG. The scanning mechanism of eukaryotic translation initiation. *Annu Rev*  
812 *Biochem*. 2014;83: 779–812. doi:10.1146/annurev-biochem-060713-035802
- 813 14. Merrick WC. eIF4F: A retrospective. *Journal of Biological Chemistry*. 2015;290: 24091–  
814 24099. doi:10.1074/jbc.R115.675280
- 815 15. Glaunsinger BA. Modulation of the translational landscape during Herpesvirus infection.  
816 *Annual Review of Virology*. 2015;2: 311–333. doi:10.1146/annurev-virology-100114-  
817 054839
- 818 16. Jan E, Mohr I, Walsh D. A cap-to-tail guide to mRNA translation strategies in virus-  
819 infected cells. *Annual Review of Virology*. 2015;3: annurev-virology-100114-055014.  
820 doi:10.1146/annurev-virology-100114-055014
- 821 17. Siddiqui N, Sonenberg N. Signalling to eIF4E in cancer. *Biochemical Society*  
822 *Transactions*. 2015;43: 763–772. doi:10.1042/BST20150126
- 823 18. Jung CH, Jun CB, Ro S-H, Kim Y-M, Otto NM, Cao J, et al. ULK-Atg13-FIP200  
824 complexes mediate mTOR signaling to the autophagy machinery. *Mol Biol Cell*. 2009;20:  
825 1992–2003. doi:10.1091/mbc.E08-12-1249
- 826 19. Bhatt AP, Damania B. AKTivation of PI3K/AKT/mTOR signaling pathway by KSHV.  
827 *Front Immunol*. 2012;3: 401. doi:10.3389/fimmu.2012.00401
- 828 20. Stallone G, Stallone G, Schena A, Schena A, Infante B, Infante B, et al. Sirolimus for  
829 Kaposi's sarcoma in renal-transplant recipients. *N Engl J Med*. 2005;352: 1317–1323.  
830 doi:10.1056/NEJMoa042831
- 831 21. Zhang Z, Chen W, Sanders MK, Brulois KF, Dittmer DP, Damania B. The K1 protein of  
832 Kaposi's Sarcoma-Associated Herpesvirus augments viral lytic replication. *Journal of*  
833 *Virology*. 2016;90: 7657–7666. doi:10.1128/JVI.03102-15
- 834 22. Martin D, Nguyen Q, Molinolo A, Gutkind JS. Accumulation of dephosphorylated 4EBP  
835 after mTOR inhibition with rapamycin is sufficient to disrupt paracrine transformation by  
836 the KSHV vGPCR oncogene. *Oncogene*. Nature Publishing Group; 2013;: 1–8.  
837 doi:10.1038/onc.2013.193
- 838 23. Bhatt AP, Wong JP, Weinberg MS, Host KM, Giffin LC, Buijnink J, et al. A viral kinase  
839 mimics S6 kinase to enhance cell proliferation. *Proceedings of the National Academy of*  
840 *Sciences*. 2016;: 201600587. doi:10.1073/pnas.1600587113

- 841 24. Kuang E, Tang Q, Maul GG, Zhu F. Activation of p90 ribosomal S6 kinase by ORF45 of  
842 Kaposi's Sarcoma-Associated Herpesvirus and its role in viral lytic replication. *Journal of*  
843 *Virology*. 2008;82: 1838–1850. doi:10.1128/JVI.02119-07
- 844 25. Arias C, Walsh D, Harbell J, Wilson AC, Mohr I. Activation of host translational control  
845 pathways by a viral developmental switch. *PLoS Pathog*. 2009;5: e1000334.  
846 doi:10.1371/journal.ppat.1000334.s001
- 847 26. Wek RC, Jiang H-Y, Anthony TG. Coping with stress: eIF2 kinases and translational  
848 control. *Biochemical Society Transactions*. 2006;34: 7–11. doi:10.1042/BST20060007
- 849 27. Thoreen CC, Chantranupong L, Keys HR, Wang T, Gray NS, Sabatini DM. A unifying  
850 model for mTORC1-mediated regulation of mRNA translation. *Nature*. 2012;486: 109–  
851 113. doi:10.1038/nature11083
- 852 28. Hsieh AC, Hsieh AC, Liu Y, Liu Y, Edlind MP, Edlind MP, et al. The translational  
853 landscape of mTOR signalling steers cancer initiation and metastasis. *Nature*. *Nature*  
854 *Publishing Group*; 2012;485: 55–61. doi:10.1038/nature10912
- 855 29. McKinney C, Zavadil J, Bianco C, Shiflett L, Brown S, Mohr I. Global reprogramming of  
856 the cellular translational landscape facilitates cytomegalovirus replication. *Cell Reports*.  
857 2014;6: 9–17. doi:10.1016/j.celrep.2013.11.045
- 858 30. Chang HH, Chang HH, Ganem D, Ganem D. A unique herpesviral transcriptional  
859 program in KSHV-infected lymphatic endothelial cells leads to mTORC1 activation and  
860 rapamycin sensitivity. *Cell Host Microbe*. 2013;13: 429–440.  
861 doi:10.1016/j.chom.2013.03.009
- 862 31. Myoung J, Ganem D. Generation of a doxycycline-inducible KSHV producer cell line of  
863 endothelial origin: maintenance of tight latency with efficient reactivation upon induction.  
864 *Journal of Virological Methods*. 2011;174: 12–21. doi:10.1016/j.jviromet.2011.03.012
- 865 32. Vieira J, O'Hearn PM. Use of the red fluorescent protein as a marker of Kaposi's sarcoma-  
866 associated herpesvirus lytic gene expression. *Virology*. 2004;325: 225–240.  
867 doi:10.1016/j.virol.2004.03.049
- 868 33. Guertin DA, Sabatini DM. Defining the Role of mTOR in Cancer. *Cancer Cell*. 2007;12:  
869 9–22. doi:10.1016/j.ccr.2007.05.008
- 870 34. Thoreen CC, Kang SA, Chang JW, Liu Q, Zhang J, Gao Y, et al. An ATP-competitive  
871 mammalian target of rapamycin inhibitor reveals rapamycin-resistant functions of  
872 mTORC1. *J Biol Chem*. 2009;284: 8023–8032. doi:10.1074/jbc.M900301200
- 873 35. Kang SA, Pacold ME, Cervantes CL, Lim D, Lou HJ, Ottina K, et al. mTORC1  
874 Phosphorylation Sites Encode Their Sensitivity to Starvation and Rapamycin. *Science*.  
875 2013;341: 1236566–1236566. doi:10.1126/science.1236566
- 876 36. Nakamura H, Lu M, Gwack Y, Souvlis J, Zeichner SL, Jung JU. Global changes in

- 877 Kaposi's Sarcoma-Associated Virus gene expression patterns following expression of a  
878 tetracycline-inducible Rta transactivator. *Journal of Virology*. 2003;77: 4205–4220.  
879 doi:10.1128/JVI.77.7.4205-4220.2003
- 880 37. Budt M, Hristozova T, Hille G, Berger K, Brune W. Construction of a lytically replicating  
881 Kaposi's Sarcoma-Associated Herpesvirus. *Journal of Virology*. 2011;85: 10415–10420.  
882 doi:10.1128/JVI.05071-11
- 883 38. Glaunsinger B, Ganem D. Highly selective escape from KSHV-mediated host mRNA  
884 shutoff and its implications for viral pathogenesis. *Journal of Experimental Medicine*.  
885 2004;200: 391–398. doi:10.1182/blood.V97.10.3244
- 886 39. Glaunsinger B, Ganem D. Lytic KSHV infection inhibits host gene expression by  
887 accelerating global mRNA turnover. *Molecular Cell*. 2004;13: 713–723.
- 888 40. Schmidt EK, Clavarino G, Ceppi M, Pierre P. SUnSET, a nonradioactive method to  
889 monitor protein synthesis. *Nature Methods*. 2009;6: 275–277. doi:10.1038/nmeth.1314
- 890 41. Covarrubias S, Gaglia MM, Kumar GR, Wong W, Jackson AO, Glaunsinger BA.  
891 Coordinated destruction of cellular messages in translation complexes by the  
892 gammaherpesvirus host shutoff factor and the mammalian exonuclease Xrn1. *PLoS*  
893 *Pathog*. 2011;7: e1002339. doi:10.1371/journal.ppat.1002339.s007
- 894 42. Arias C, Weisburd B, Stern-Ginossar N, Mercier A, Madrid AS, Bellare P, et al. KSHV  
895 2.0: a comprehensive annotation of the Kaposi's sarcoma-associated herpesvirus genome  
896 using next-generation sequencing reveals novel genomic and functional features. *PLoS*  
897 *Pathog*. 2014;10: e1003847. doi:10.1371/journal.ppat.1003847
- 898 43. Roy D, Roy D, Sin SH, Sin SH, Lucas A, Lucas A, et al. mTOR Inhibitors Block Kaposi  
899 Sarcoma Growth by inhibiting essential autocrine growth factors and tumor angiogenesis.  
900 *Cancer Research*. 2013;73: 2235–2246. doi:10.1158/0008-5472.CAN-12-1851
- 901 44. Sodhi A, Chaisuparat R, Hu J, Ramsdell AK, Manning BD, Sausville EA, et al. The  
902 TSC2/mTOR pathway drives endothelial cell transformation induced by the Kaposi's  
903 sarcoma-associated herpesvirus G protein-coupled receptor. *Cancer Cell*. 2006;10: 133–  
904 143. doi:10.1016/j.ccr.2006.05.026
- 905 45. Heyer EE, Moore MJ. Redefining the translational status of 80S monosomes. *Cell*.  
906 2016;164: 757–769. doi:10.1016/j.cell.2016.01.003
- 907 46. Mehta P, Woo P, Venkataraman K, Karzai AW. Ribosome purification approaches for  
908 studying interactions of regulatory proteins and RNAs with the ribosome. *Methods Mol*  
909 *Biol*. 2012;905: 273–289. doi:10.1007/978-1-61779-949-5\_18
- 910 47. Belin S, Hacot S, Daudignon L, Therizols G, Pourpe S, Mertani HC, et al. Purification of  
911 ribosomes from human cell lines. *Curr Protoc Cell Biol*. 2010;Chapter 3: Unit 3.40.  
912 doi:10.1002/0471143030.cb0340s49

- 913 48. Imataka H, Olsen HS, Sonenberg N. A new translational regulator with homology to  
914 eukaryotic translation initiation factor 4G. *The EMBO Journal*. 1997;16: 817–825.  
915 doi:10.1093/emboj/16.4.817
- 916 49. Henis-Korenblit S, Shani G, Sines T, Marash L, Shohat G, Kimchi A. The caspase-  
917 cleaved DAP5 protein supports internal ribosome entry site-mediated translation of death  
918 proteins. *Proc Natl Acad Sci USA*. 2002;99: 5400–5405. doi:10.1073/pnas.082102499
- 919 50. Bushell M, Poncet D, Marissen WE, Flotow H, Lloyd RE, Clemens MJ, et al. Cleavage of  
920 polypeptide chain initiation factor eIF4GI during apoptosis in lymphoma cells:  
921 characterisation of an internal fragment generated by caspase-3-mediated cleavage. *Cell*  
922 *Death Differ*. 2000;7: 628–636. doi:10.1038/sj.cdd.4400699
- 923 51. Tabtieng T, Degtarev A, Gaglia MM. Caspase-dependent suppression of type I interferon  
924 signaling promotes Kaposi's Sarcoma-Associated Herpesvirus Lytic replication. *Journal of*  
925 *Virology*. 2018;92. doi:10.1128/JVI.00078-18
- 926 52. Castelli LM, Talavera D, Kershaw CJ, Mohammad-Qureshi SS, Costello JL, Rowe W, et  
927 al. The 4E-BP Caf20p mediates both eIF4E-dependent and independent repression of  
928 translation. *PLoS Genet*. 2015;11: e1005233. doi:10.1371/journal.pgen.1005233.s008
- 929 53. Nichols LA, Adang LA, Kedes DH. Rapamycin blocks production of KSHV/HHV8:  
930 insights into the anti-tumor activity of an immunosuppressant drug. Nichols LA, Adang  
931 LA, Kedes DH. *PLoS ONE*. 2011;6: e14535. doi:10.1371/journal.pone.0014535.g005
- 932 54. Coots RA, Liu X-M, Mao Y, Dong L, Zhou J, Wan J, et al. A facilitates eIF4F-  
933 independent mRNA translation. *Molecular Cell*. 2017;68: 504–514.e7.  
934 doi:10.1016/j.molcel.2017.10.002
- 935 55. Ho JJD, Wang M, Audas TE, Kwon D, Carlsson SK, Timpano S, et al. Systemic  
936 reprogramming of translation efficiencies on oxygen stimulus. *Cell Reports*. 2016;14:  
937 1293–1300. doi:10.1016/j.celrep.2016.01.036
- 938 56. Uniacke J, Holterman CE, Lachance G, Franovic A, Jacob MD, Fabian MR, et al. An  
939 oxygen-regulated switch in the protein synthesis machinery. *Nature*. 2013;486: 126–129.  
940 doi:10.1038/nature11055
- 941 57. Hesser C, Karijolich J, Dominissini D, He C, Glaunsinger BA. N 6-methyladenosine  
942 modification and the YTHDF2 reader protein play cell type specific roles in lytic viral  
943 gene expression during Kaposi's sarcoma-associated herpesvirus infection. *Plos Pathog*.  
944 2018;14: e1006995. doi:10.1101/201475
- 945 58. Ye F, Chen ER, Nilsen TW. Kaposi's Sarcoma-Associated Herpesvirus utilizes and  
946 manipulates RNA N 6-Adenosine methylation to promote lytic replication. *Journal of*  
947 *Virology*. 2018;92: e00220-18. doi:10.1128/JVI.00466-17
- 948 59. Tan B, Liu H, Zhang S, da Silva SR, Zhang L, Meng J, et al. Viral and cellular N 6-  
949 methyladenosin and N 6, 2'-O-dimethyladenosine epitranscriptomes in the KSHV life



- 950 cycle. *Nature Microbiology*. 2017;3: 108–120. doi:10.1038/s41564-017-0056-8
- 951 60. Lahr RM, Fonseca BD, Ciotti GE, Al-Ashtal HA, Jia J-J, Niklaus MR, et al. La-related  
952 protein 1 (LARP1) binds the mRNA cap, blocking eIF4F assembly on TOP mRNAs.  
953 *eLife*. 2017;6. doi:10.7554/eLife.24146
- 954 61. Tcherkezian J, Cargnello M, Romeo Y, Huttlin EL, Lavoie G, Gygi SP, et al. Proteomic  
955 analysis of cap-dependent translation identifies LARP1 as a key regulator of 5'TOP  
956 mRNA translation. *Genes & Development*. 2014;28: 357–371.  
957 doi:10.1101/gad.231407.113
- 958 62. Philippe L, Vasseur J-J, Debart F, Thoreen CC. La-related protein 1 (LARP1) repression  
959 of TOP mRNA translation is mediated through its cap-binding domain and controlled by  
960 an adjacent regulatory region. *Nucleic Acids Research*. 2017. doi:10.1093/nar/gkx1237
- 961 63. Lenarcic EM, Ziehr B, De Leon G, Mitchell D, Moorman NJ. Differential role for host  
962 translation factors in host and viral protein synthesis during human cytomegalovirus  
963 infection. *Journal of Virology*. 2014;88: 1473–1483. doi:10.1128/JVI.02321-13
- 964 64. Arcondeguy T, Lacazette E, Millevoi S, Prats H, Touriol C. VEGF-A mRNA processing,  
965 stability and translation: a paradigm for intricate regulation of gene expression at the post-  
966 transcriptional level. *Nucleic Acids Research*. 2013;41: 7997–8010.  
967 doi:10.1016/j.cell.2011.10.002
- 968 65. Ricci EP, Mure F, Gruffat H, Decimo D, Medina-Palazon C, Ohlmann T, et al.  
969 Translation of intronless RNAs is strongly stimulated by the Epstein–Barr virus mRNA  
970 export factor EB2. *Nucleic Acids Research*. 2009;37: 4932–4943. doi:10.1128/JVI.02665-  
971 06
- 972 66. Larralde O, Smith RWP, Wilkie GS, Malik P, Gray NK, Clements JB. Direct stimulation  
973 of translation by the multifunctional Herpesvirus ICP27 protein. *Journal of Virology*.  
974 2006;80: 1588–1591. doi:10.1128/JVI.80.3.1588-1591.2006
- 975 67. Smith RWP, Anderson RC, Larralde O, Smith JWS, Gorgoni B, Richardson WA, et al.  
976 Viral and cellular mRNA-specific activators harness PABP and eIF4G to promote  
977 translation initiation downstream of cap binding. *Proceedings of the National Academy of  
978 Sciences*. 2017;114: 6310–6315. doi:10.1016/S0022-2836(02)00655-1
- 979 68. Mure F, Panthu B, Zanella-Cléon I, Delolme F, Manet E, Ohlmann T, et al. Epstein-Barr  
980 Virus protein EB2 stimulates translation initiation of mRNAs through direct interactions  
981 with both poly(A)-binding protein and eukaryotic initiation factor 4G. *Journal of  
982 Virology*. 2018;92. doi:10.1128/JVI.01917-17
- 983 69. Smith RWP, Anderson RC, Larralde O, Smith JWS, Gorgoni B, Richardson WA, et al.  
984 Viral and cellular mRNA-specific activators harness PABP and eIF4G to promote  
985 translation initiation downstream of cap binding. *Proceedings of the National Academy of  
986 Sciences*. 2017;114: 6310–6315. doi:10.1016/S0022-2836(02)00655-1

- 987 70. Sandri-Goldin RM. The many roles of the highly interactive HSV protein ICP27, a key  
988 regulator of infection. *Future Microbiology*. 2011;6: 1261–1277. doi:10.2217/fmb.11.119
- 989 71. Lenarcic EM, Ziehr BJ, Moorman NJ. An unbiased proteomics approach to identify  
990 human cytomegalovirus RNA-associated proteins. *Virology*. 2015;481: 13–23.  
991 doi:10.1016/j.virol.2015.02.008
- 992 72. Timpano S, Uniacke J. Human cells cultured under physiological oxygen utilize two cap-  
993 binding proteins to recruit distinct mRNAs for translation. *Journal of Biological*  
994 *Chemistry*. 2016;: jbc.M116.717363. doi:10.1074/jbc.M116.717363
- 995 73. Kim J, Kundu M, Viollet B, Guan K-L. AMPK and mTOR regulate autophagy through  
996 direct phosphorylation of Ulk1. *Nature Cell Biology*. 2011;13: 132–141.  
997 doi:10.1038/ncb2152
- 998 74. Choi Y, Bowman JW, Jung JU. Autophagy during viral infection— a double-edged  
999 sword. *Nature Reviews Microbiology*. 2018;16: 341–354. doi:10.1038/s41579-018-0003-  
1000 6
- 1001 75. Speck SH, Ganem D. Viral latency and its regulation: lessons from the  
1002 gammaherpesviruses. *Cell Host Microbe*. 2010;8: 100–115.  
1003 doi:10.1016/j.chom.2010.06.014
- 1004 76. Ersching J, Efeyan A, Mesin L, Jacobsen JT, Pasqual G, Grabiner BC, et al. Germinal  
1005 center selection and affinity maturation require dynamic regulation of mTORC1 kinase.  
1006 *Immunity*. 2017;46: 1045–1064.e0. doi:10.1016/j.immuni.2017.06.005
- 1007 77. Ye L, Lee J, Xu L, Mohammed A-U-R, Li W, Hale JS, et al. mTOR promotes antiviral  
1008 humoral immunity by differentially regulating CD4 helper T cell and B cell responses.  
1009 *Journal of Virology*. 2017;91. doi:10.1128/JVI.01653-16
- 1010 78. Carpenter AE, Jones TR, Lamprecht MR, Clarke C, Kang IH, Friman O, et al.  
1011 CellProfiler: image analysis software for identifying and quantifying cell phenotypes.  
1012 *Genome Biol*. 2006;7: R100. doi:10.1186/gb-2006-7-10-r100
- 1013 79. Yoo S-M, Ahn A-K, Seo T, Hong HB, Chung M-A, Jung S-D, et al. Centrifugal  
1014 enhancement of Kaposi's sarcoma-associated virus infection of human endothelial cells in  
1015 vitro. *Journal of Virological Methods*. 2008;154: 160–166.  
1016 doi:10.1016/j.jviromet.2008.07.026
- 1017 80. Patro R, Duggal G, Love MI, Irizarry RA, Kingsford C. salmon provides fast and bias-  
1018 aware quantification of transcript expression. *Nature Methods*. 2017;14: 417–419.  
1019 doi:10.1038/nmeth.4197
- 1020 81. Ritchie ME, Phipson B, Wu D, Hu Y, Law CW, Shi W, et al. limma powers differential  
1021 expression analyses for RNA-sequencing and microarray studies. *Nucleic Acids Research*.  
1022 2015;43: e47–e47. doi:10.1186/s13059-014-0465-4

- 1023 82. Quackenbush J. Microarray data normalization and transformation. *Nat Genet.* 2002;32:  
1024 496–501. doi:10.1038/ng1032
- 1025 83. Andreev DE, O'Connor PBF, Fahey C, Kenny EM, Terenin IM, Dmitriev SE, et al.  
1026 Translation of 5' leaders is pervasive in genes resistant to eIF2 repression. *eLife.* 2015;4:  
1027 e03971. doi:10.7554/eLife.03971
- 1028 84. Panda A, Martindale J, Gorospe M. Polysome Fractionation to Analyze mRNA  
1029 Distribution Profiles. *BIO-PROTOCOL.* 2017;7. doi:10.21769/BioProtoc.2126
- 1030

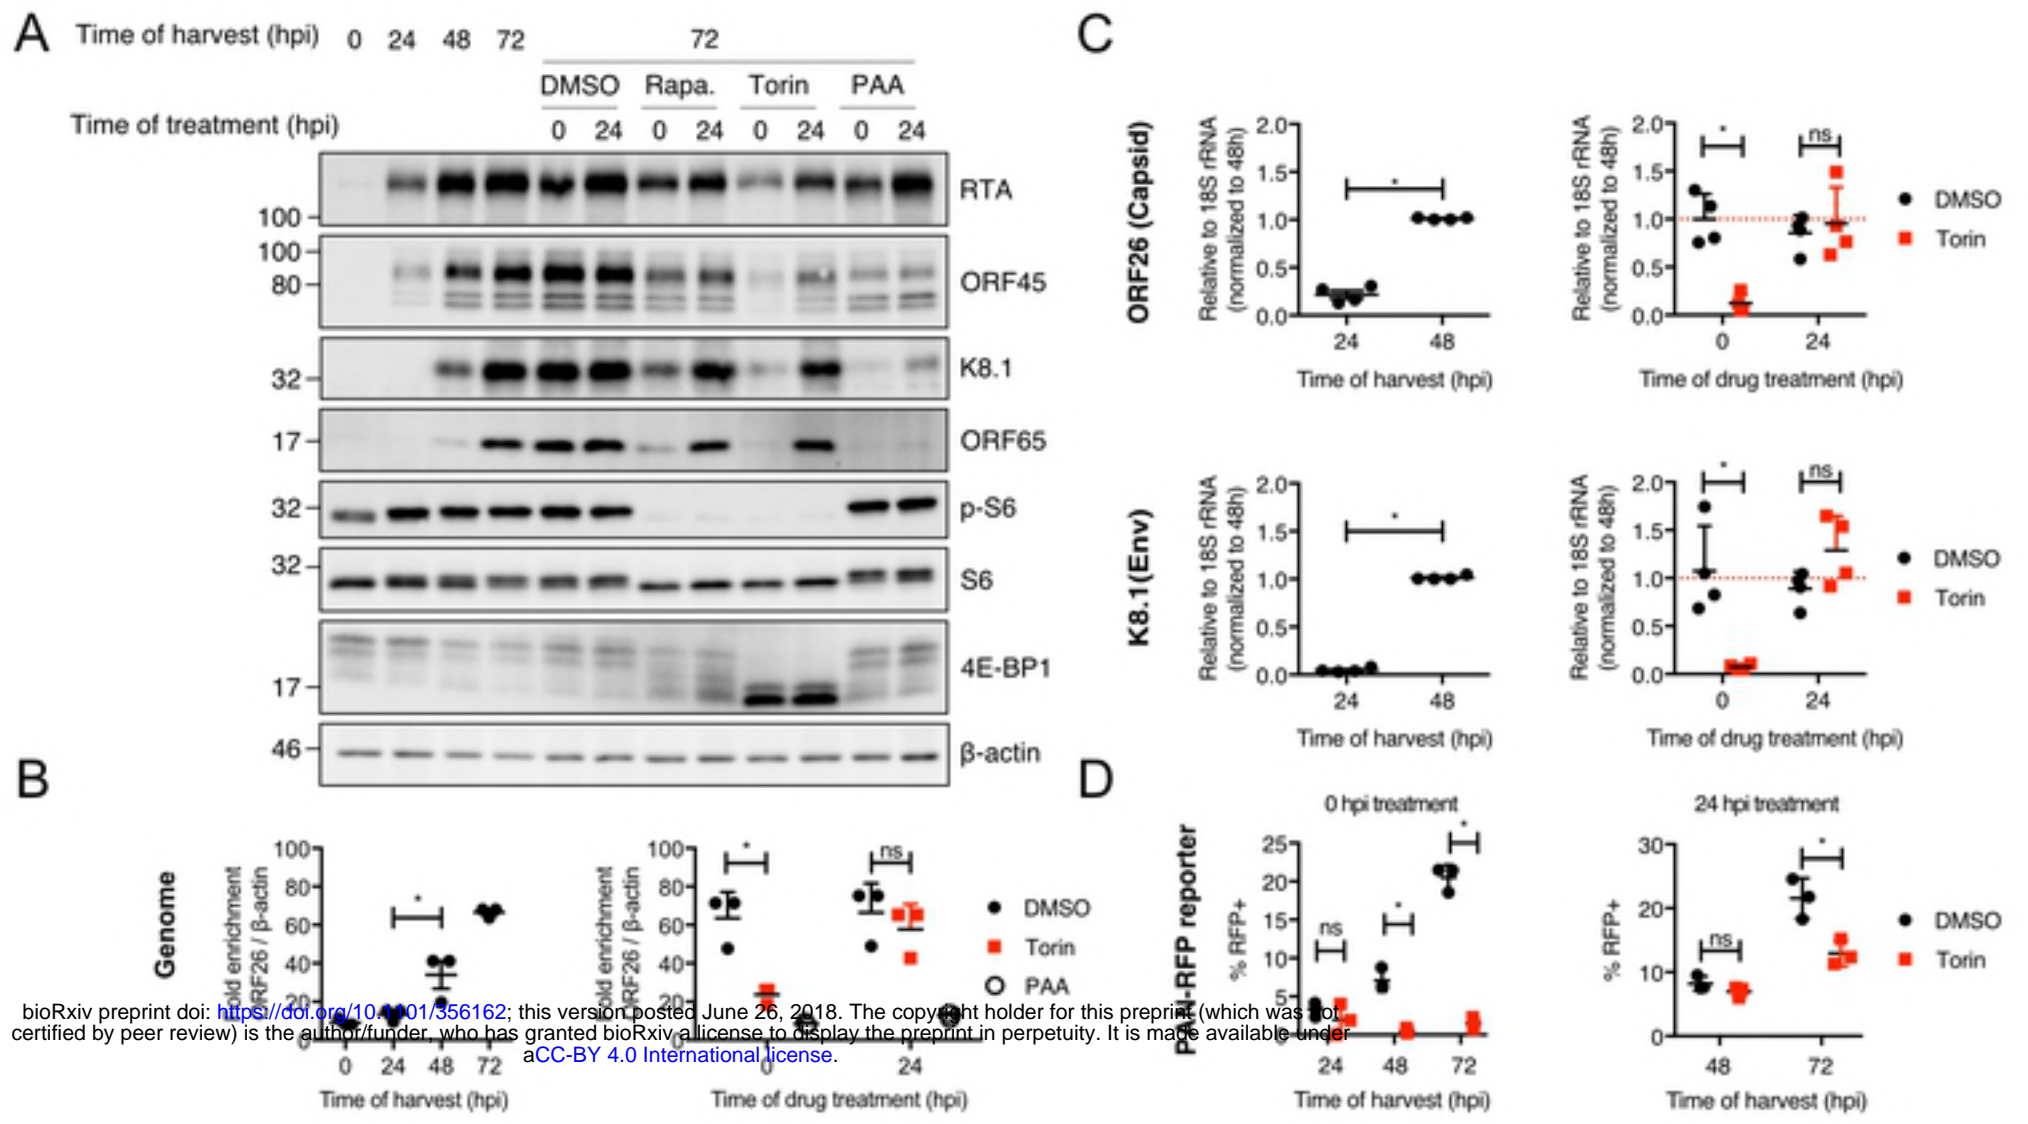

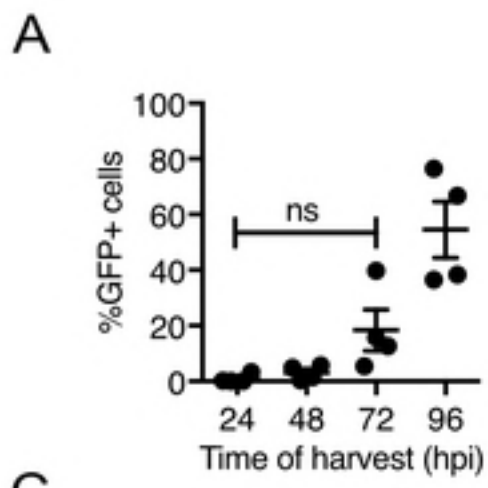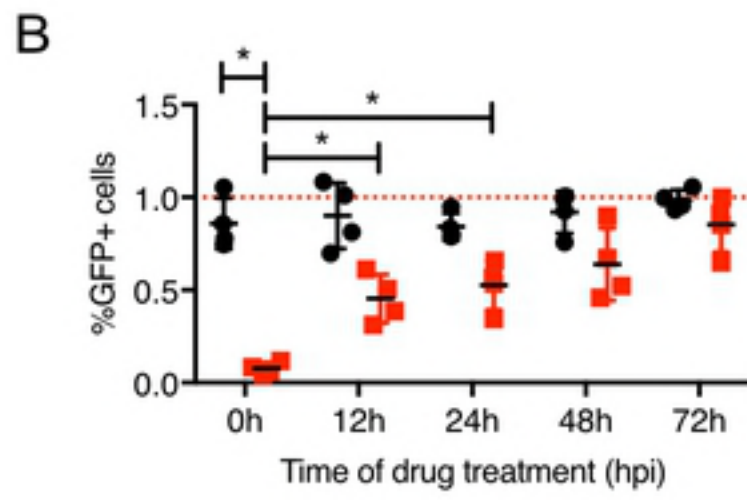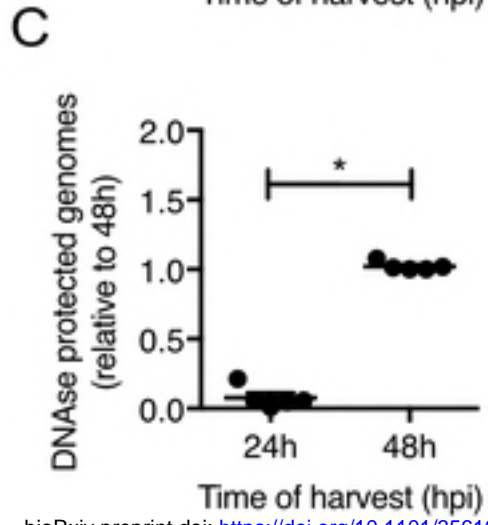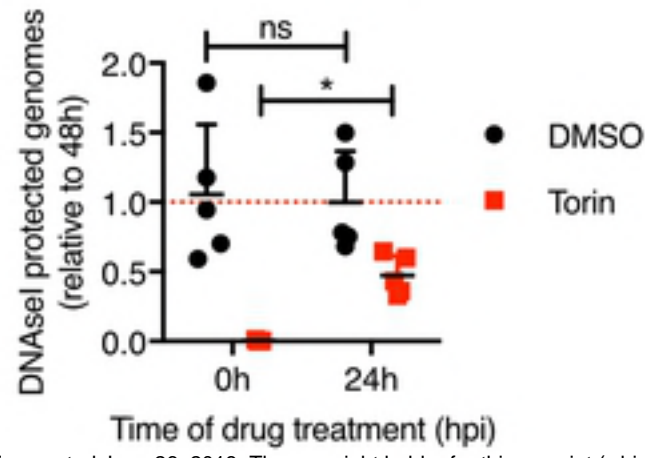

bioRxiv preprint doi: <https://doi.org/10.1101/356162>; this version posted June 26, 2018. The copyright holder for this preprint (which was not certified by peer review) is the author/funder, who has granted bioRxiv a license to display the preprint in perpetuity. It is made available under aCC-BY 4.0 International license.

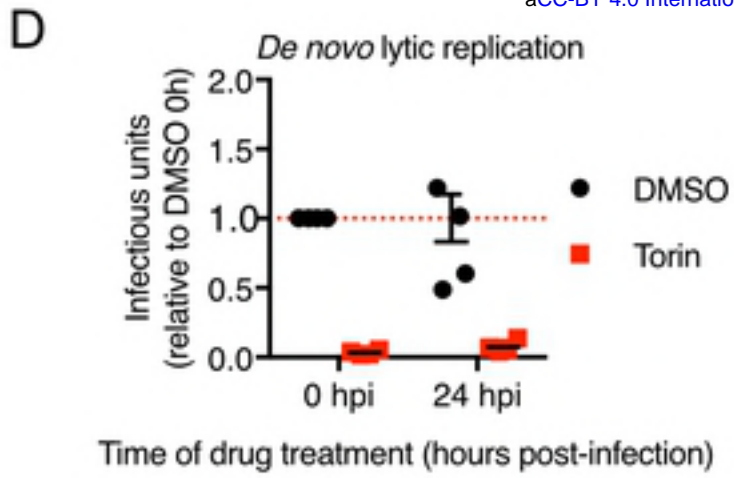

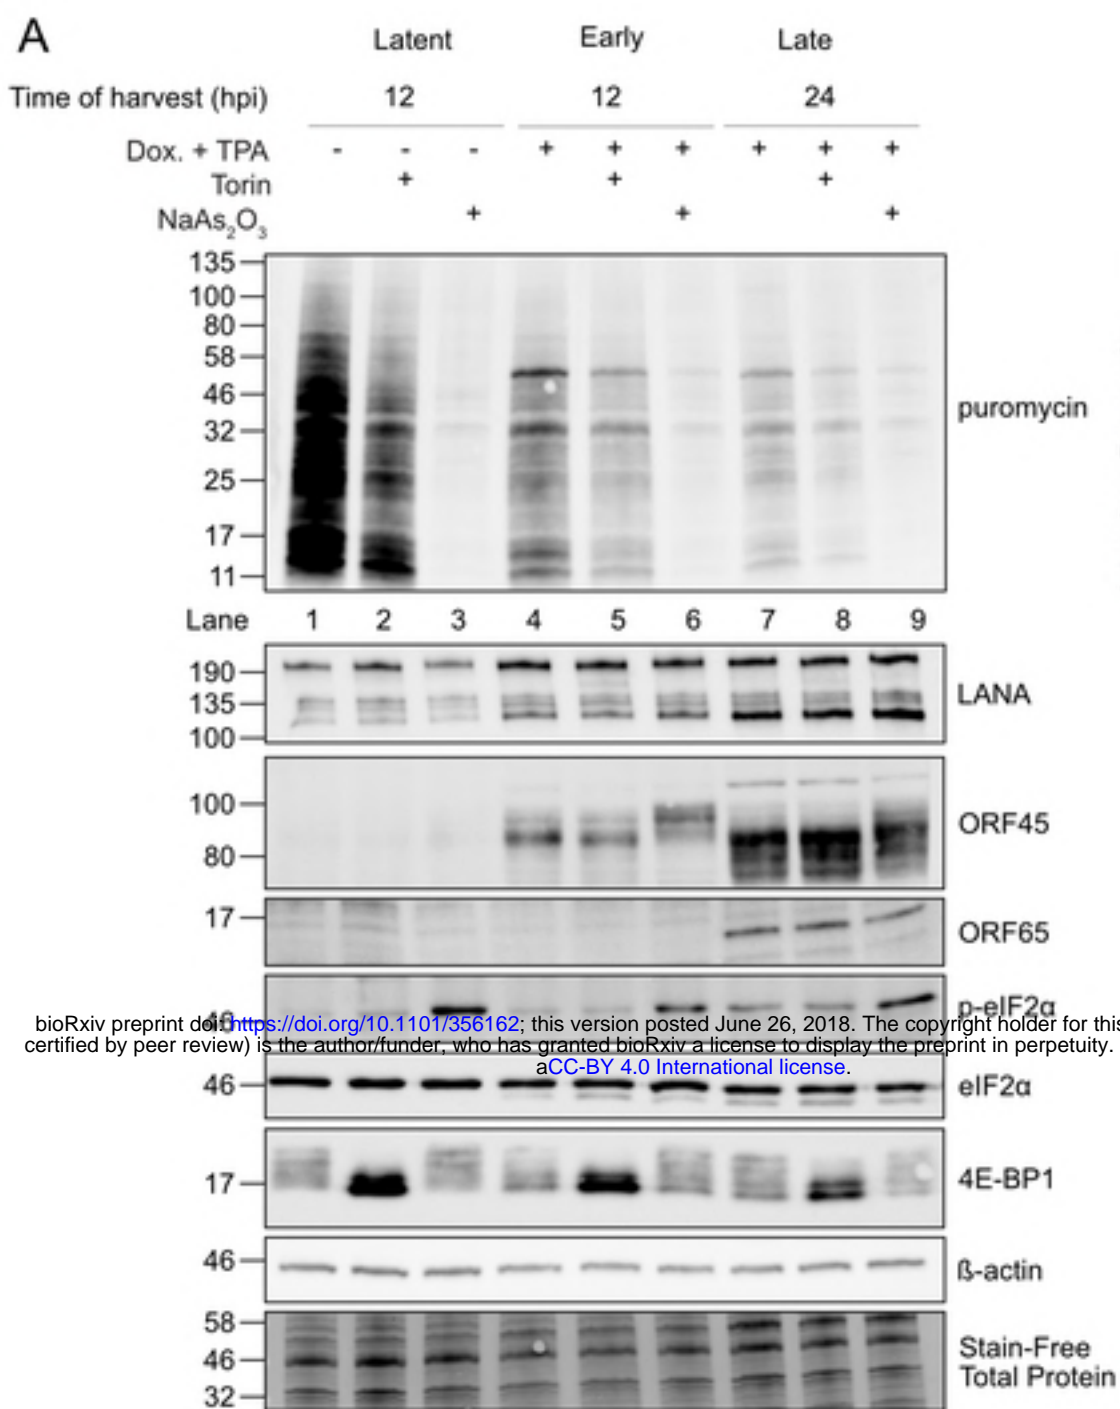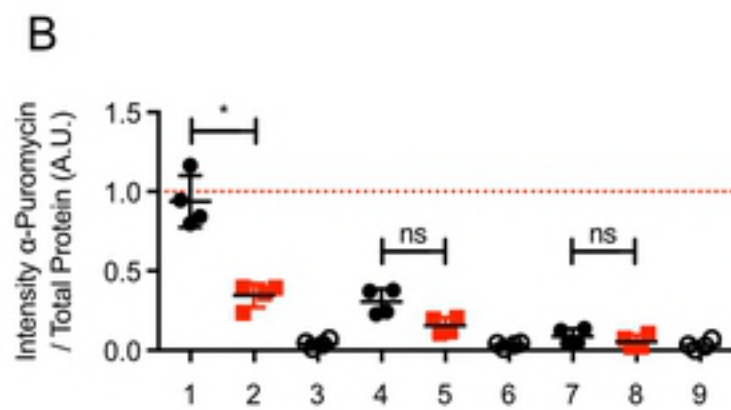

bioRxiv preprint doi: <https://doi.org/10.1101/356162>; this version posted June 26, 2018. The copyright holder for this preprint (which was not certified by peer review) is the author/funder, who has granted bioRxiv a license to display the preprint in perpetuity. It is made available under aCC-BY 4.0 International license.

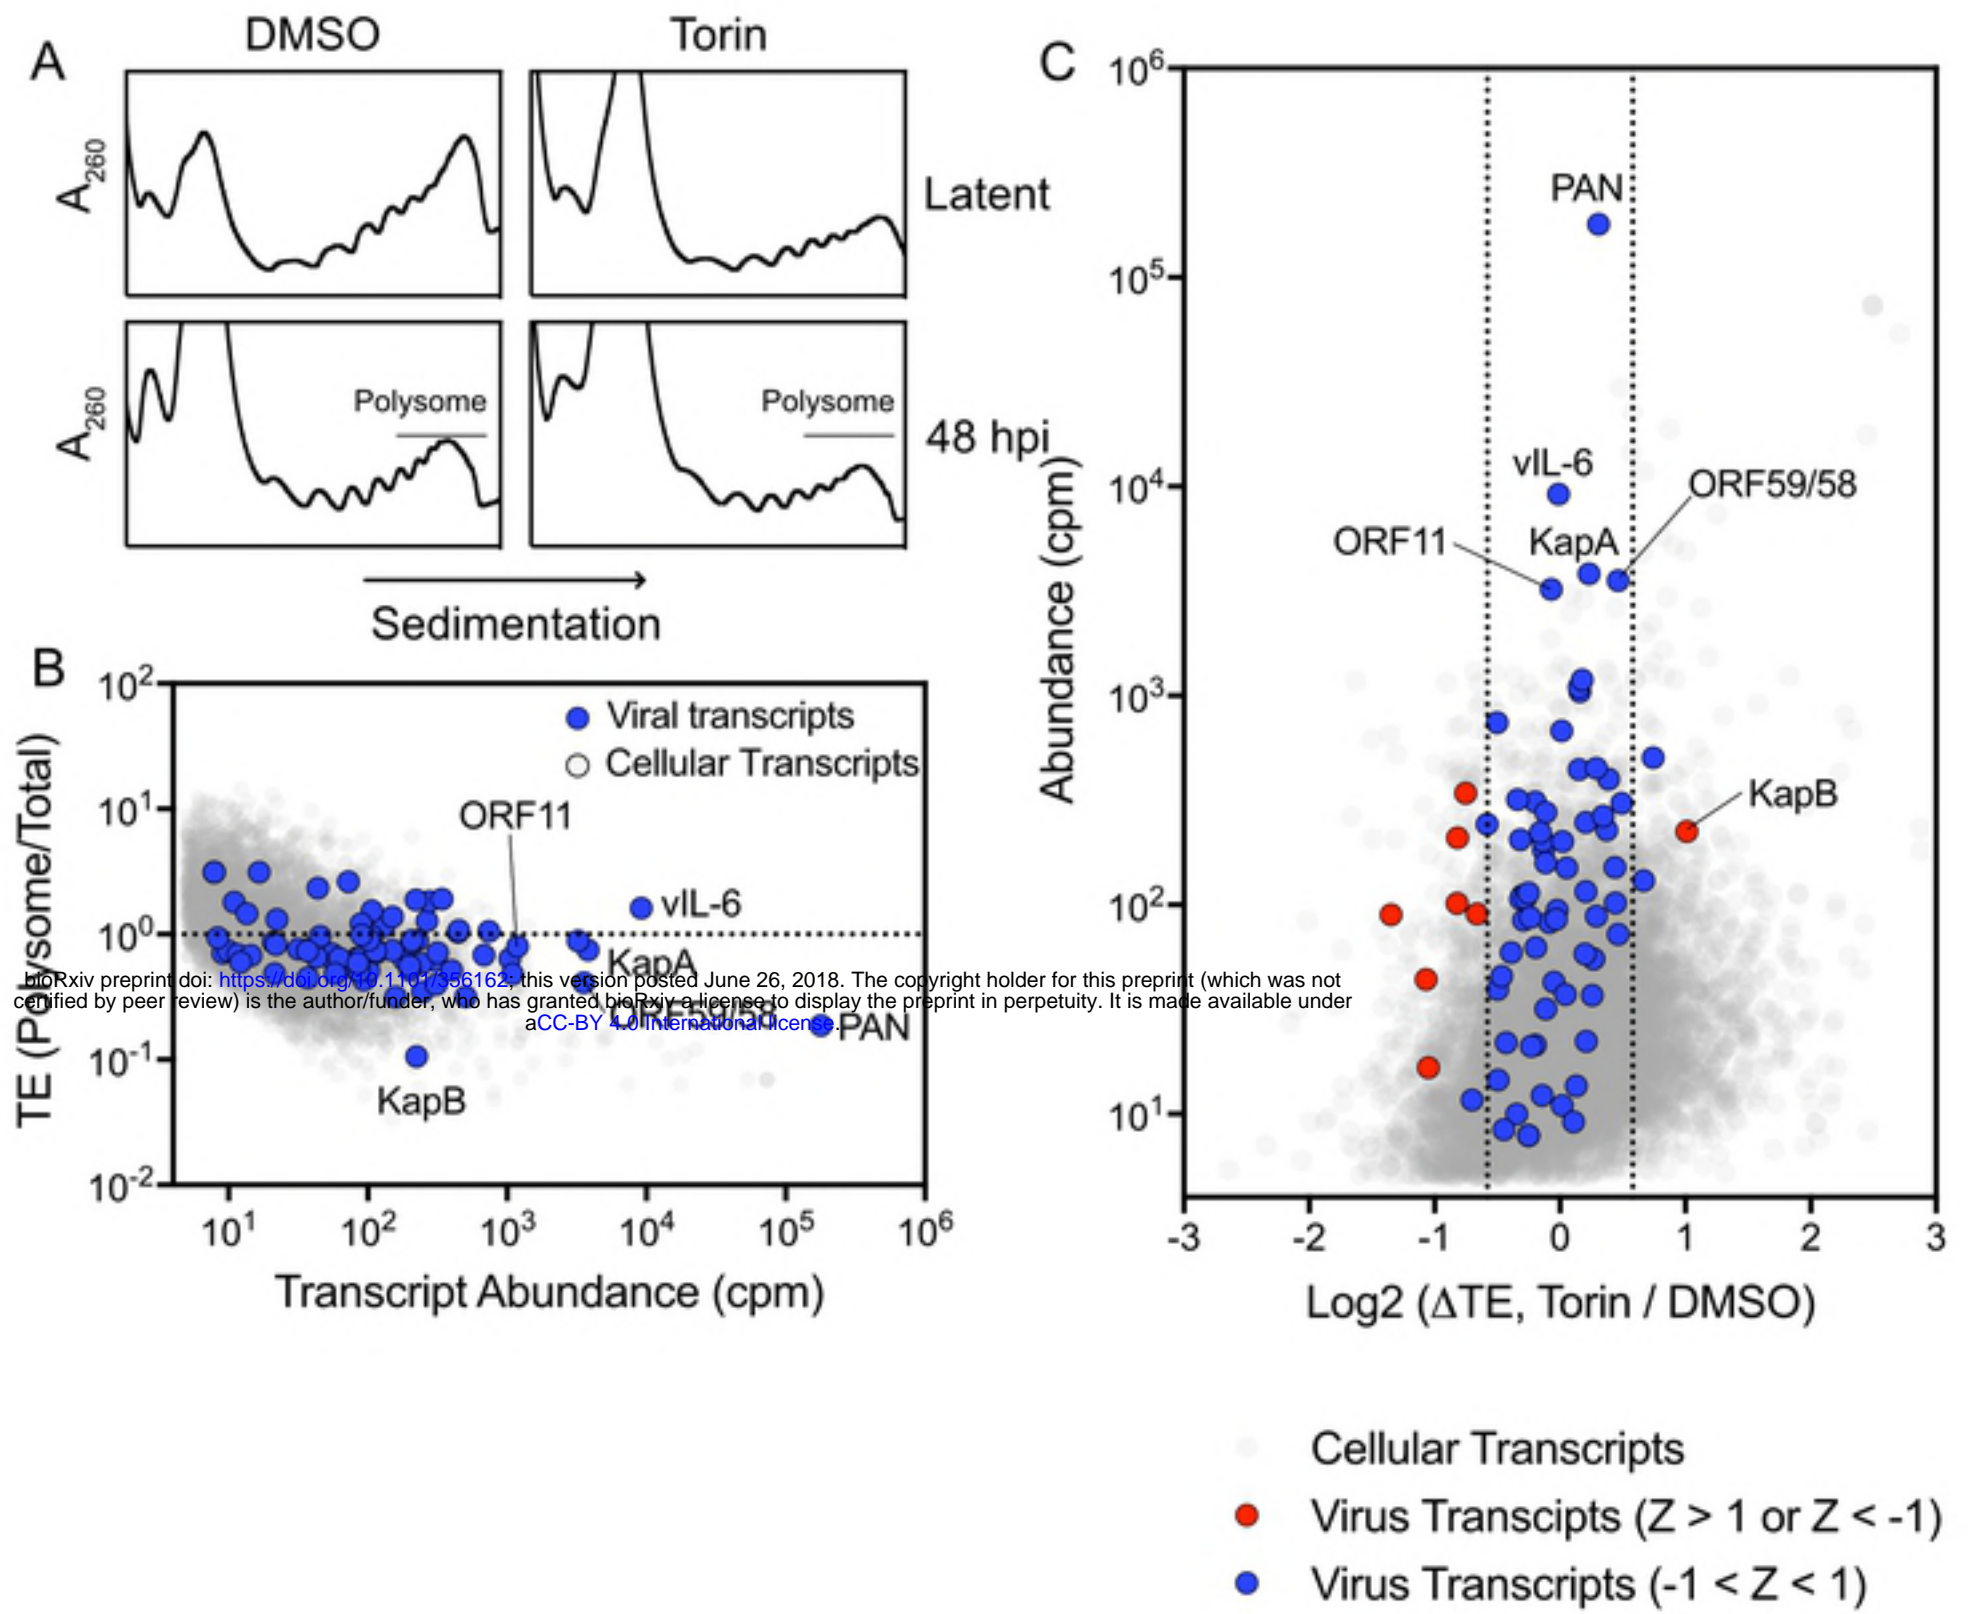

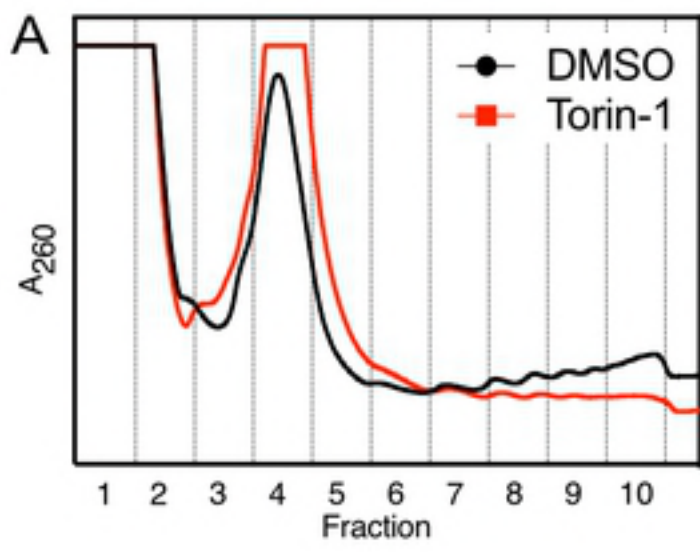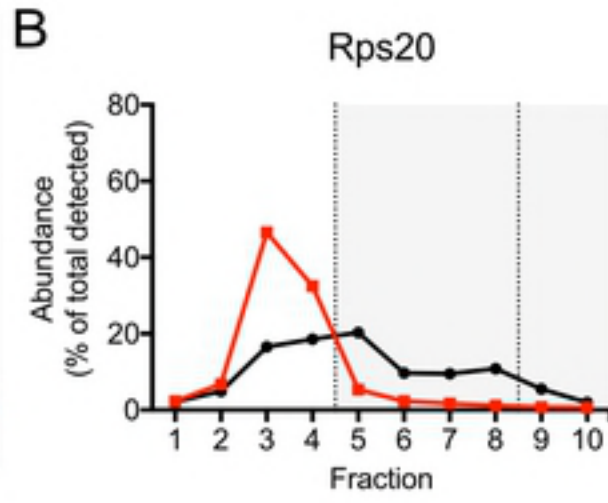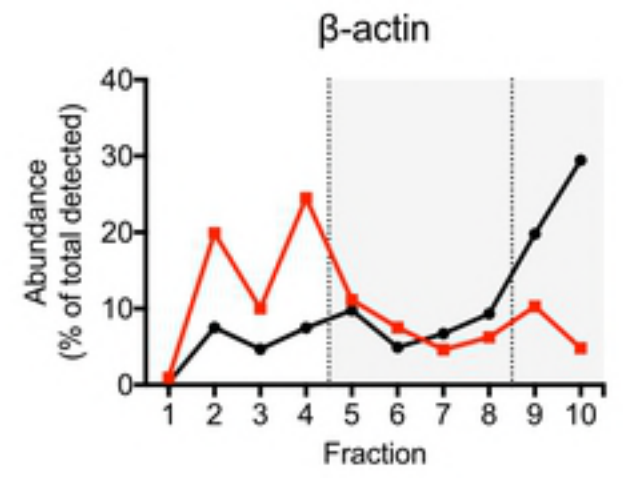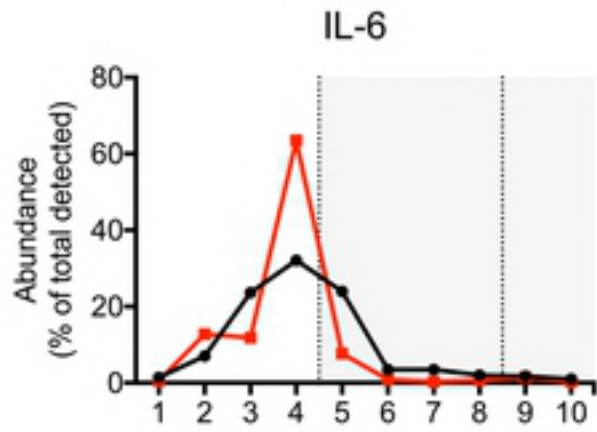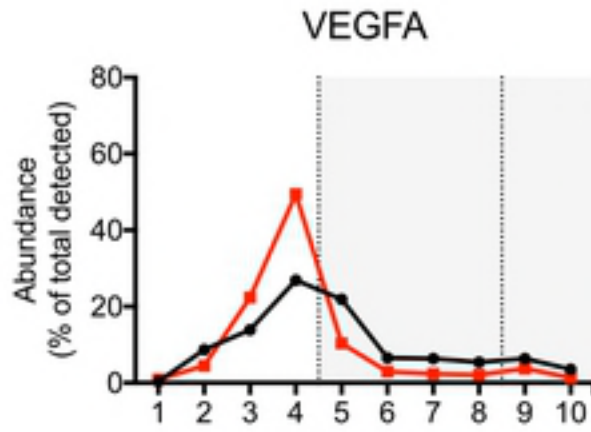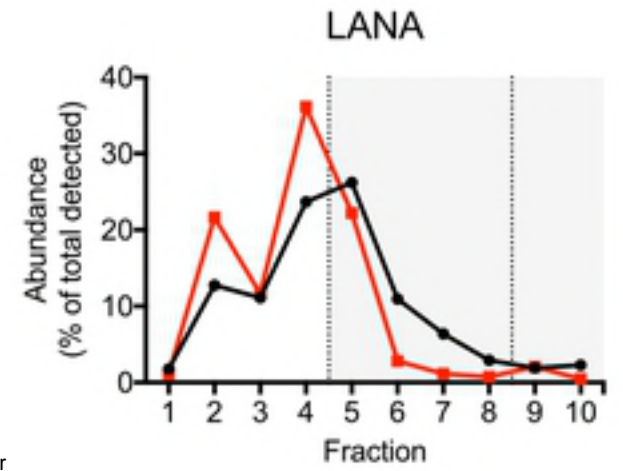

bioRxiv preprint doi: <https://doi.org/10.1101/356162>; this version posted June 26, 2018. The copyright holder for this preprint (which was not certified by peer review) is the author/funder, who has granted bioRxiv a license to display the preprint in perpetuity. It is made available under aCC-BY 4.0 International license.

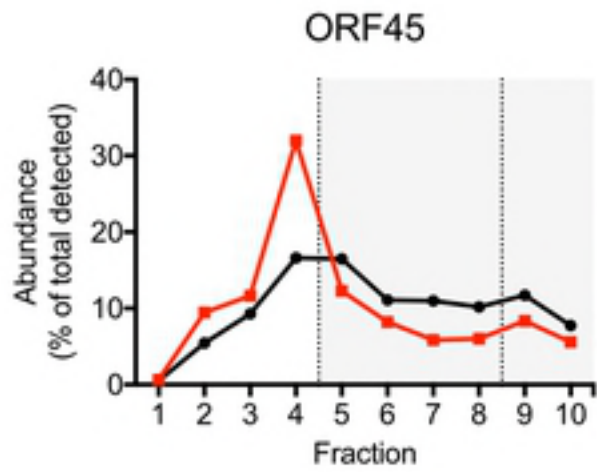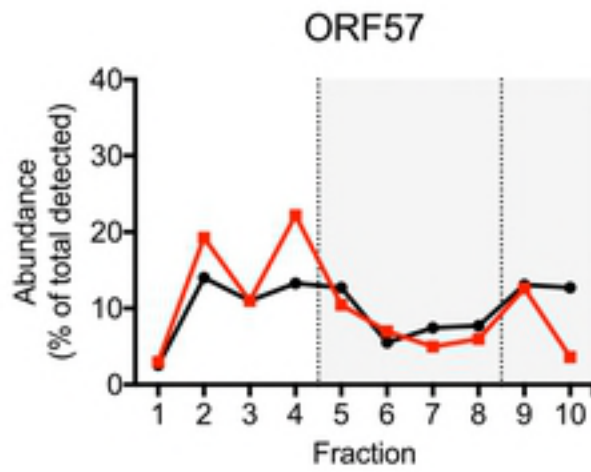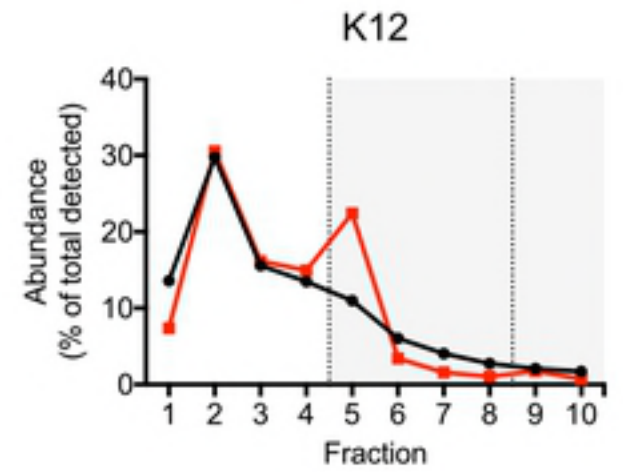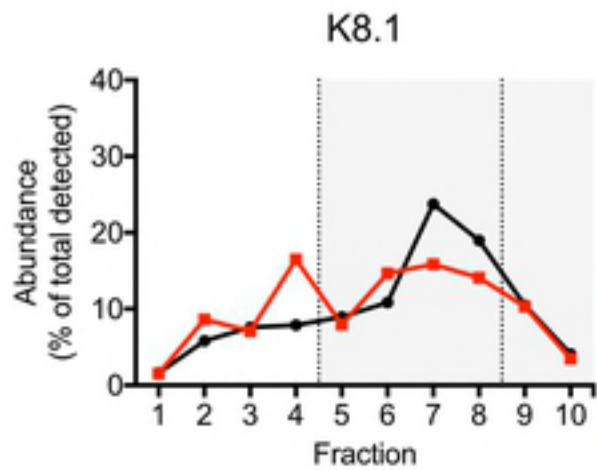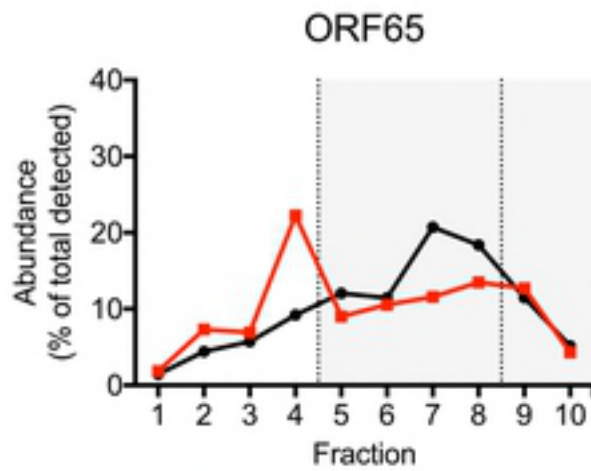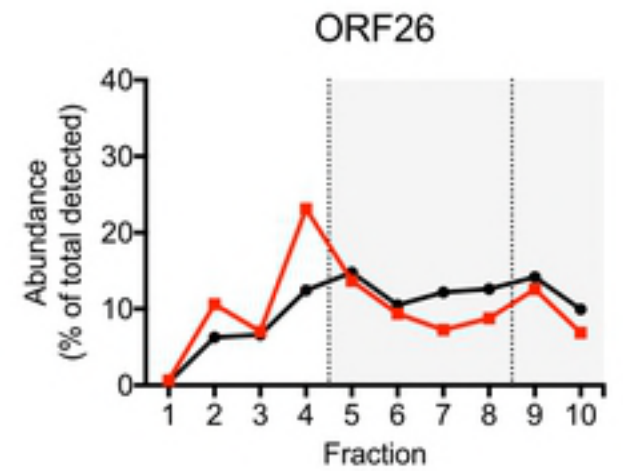



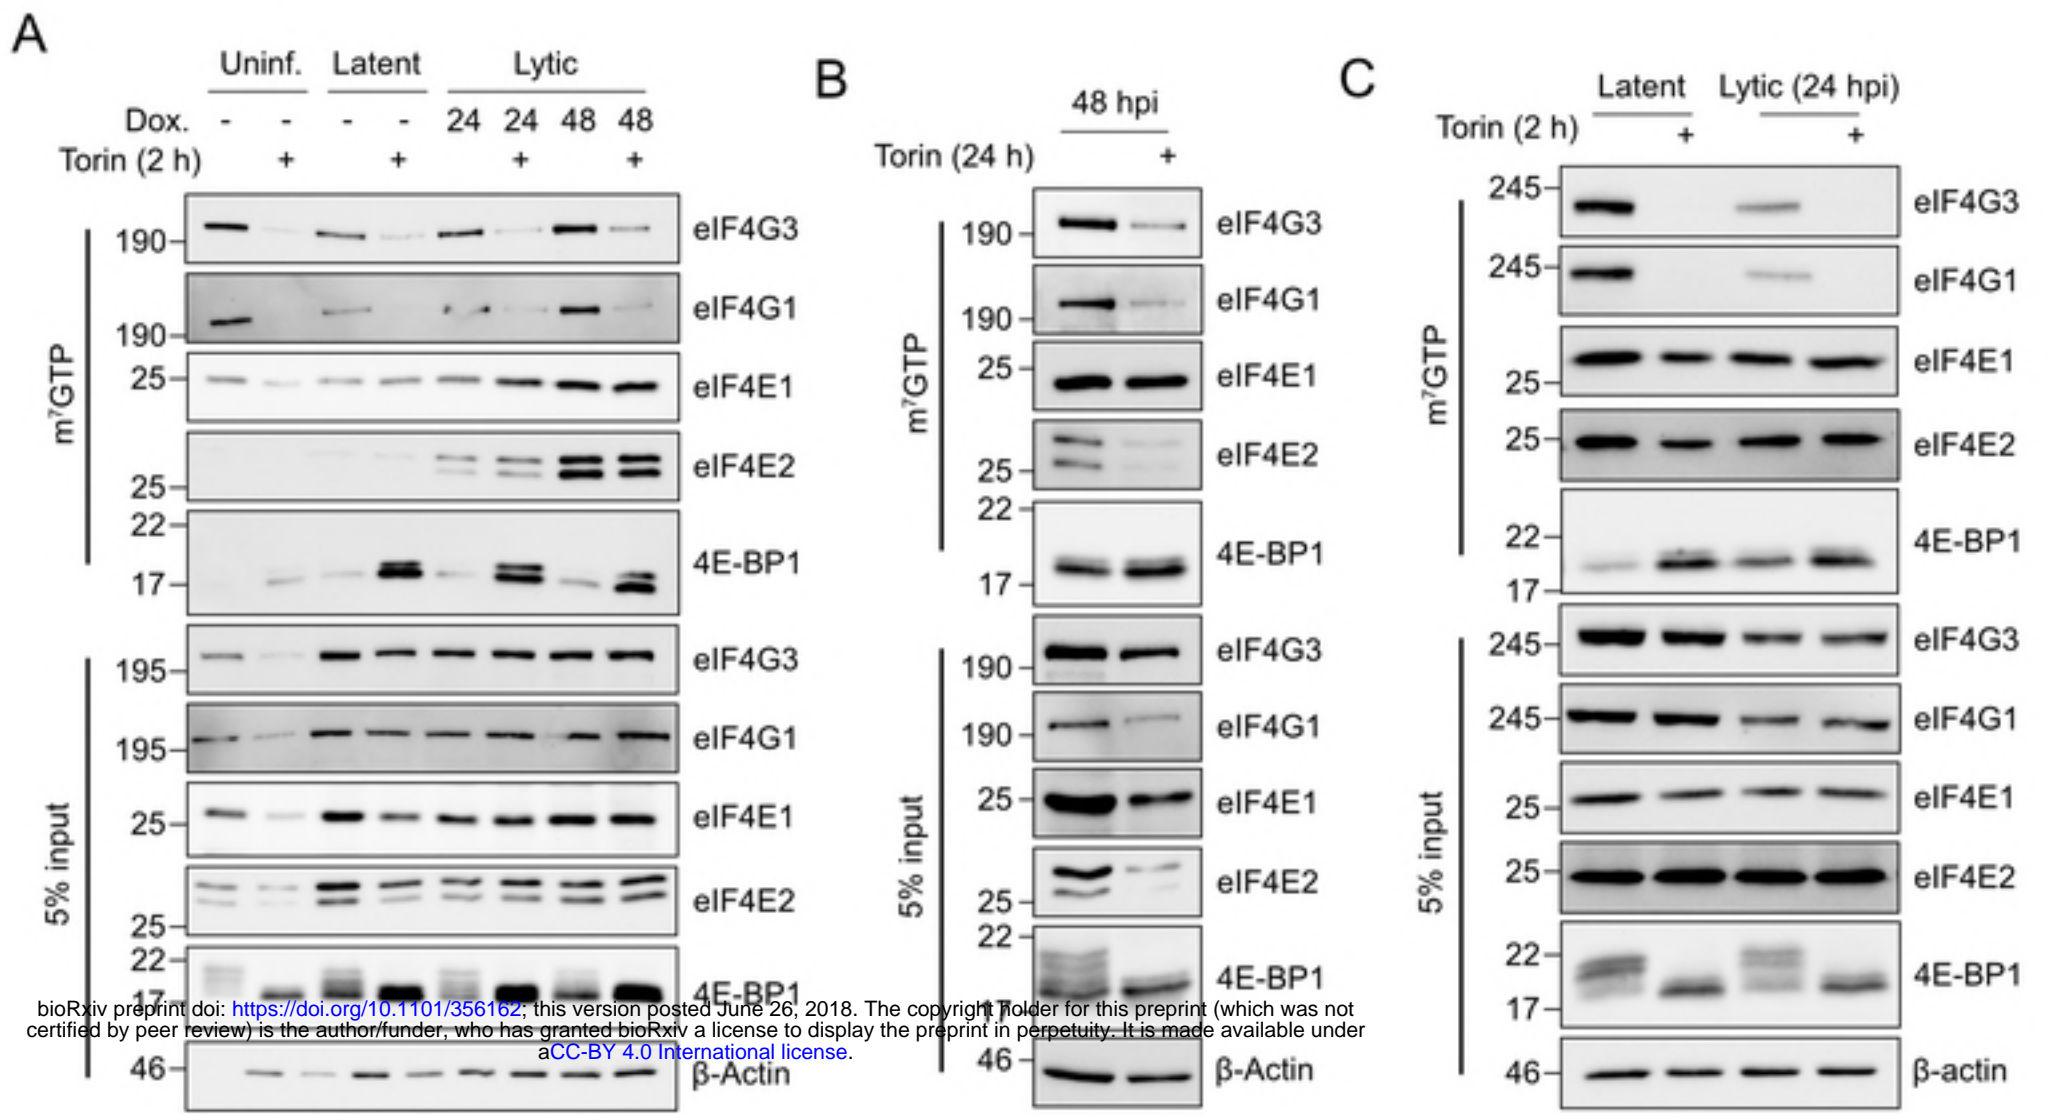

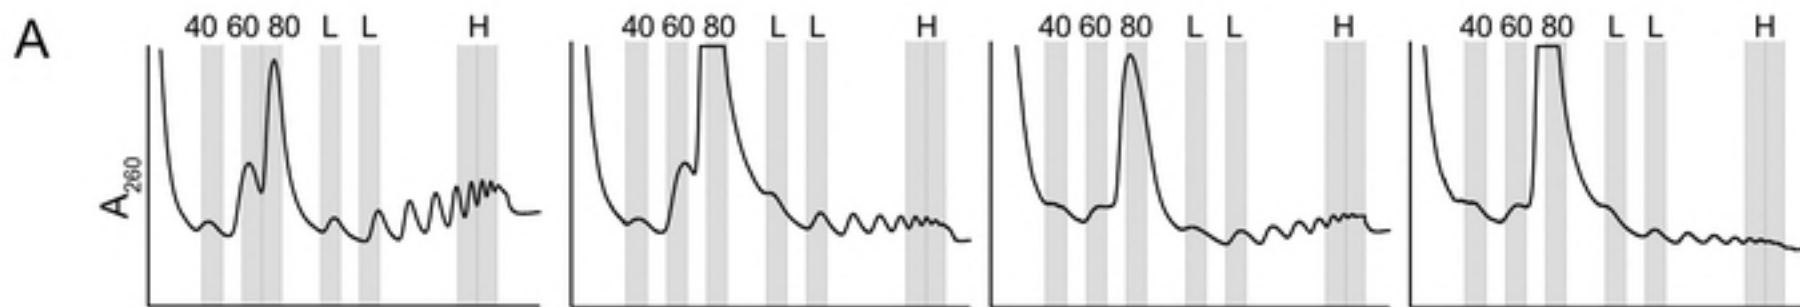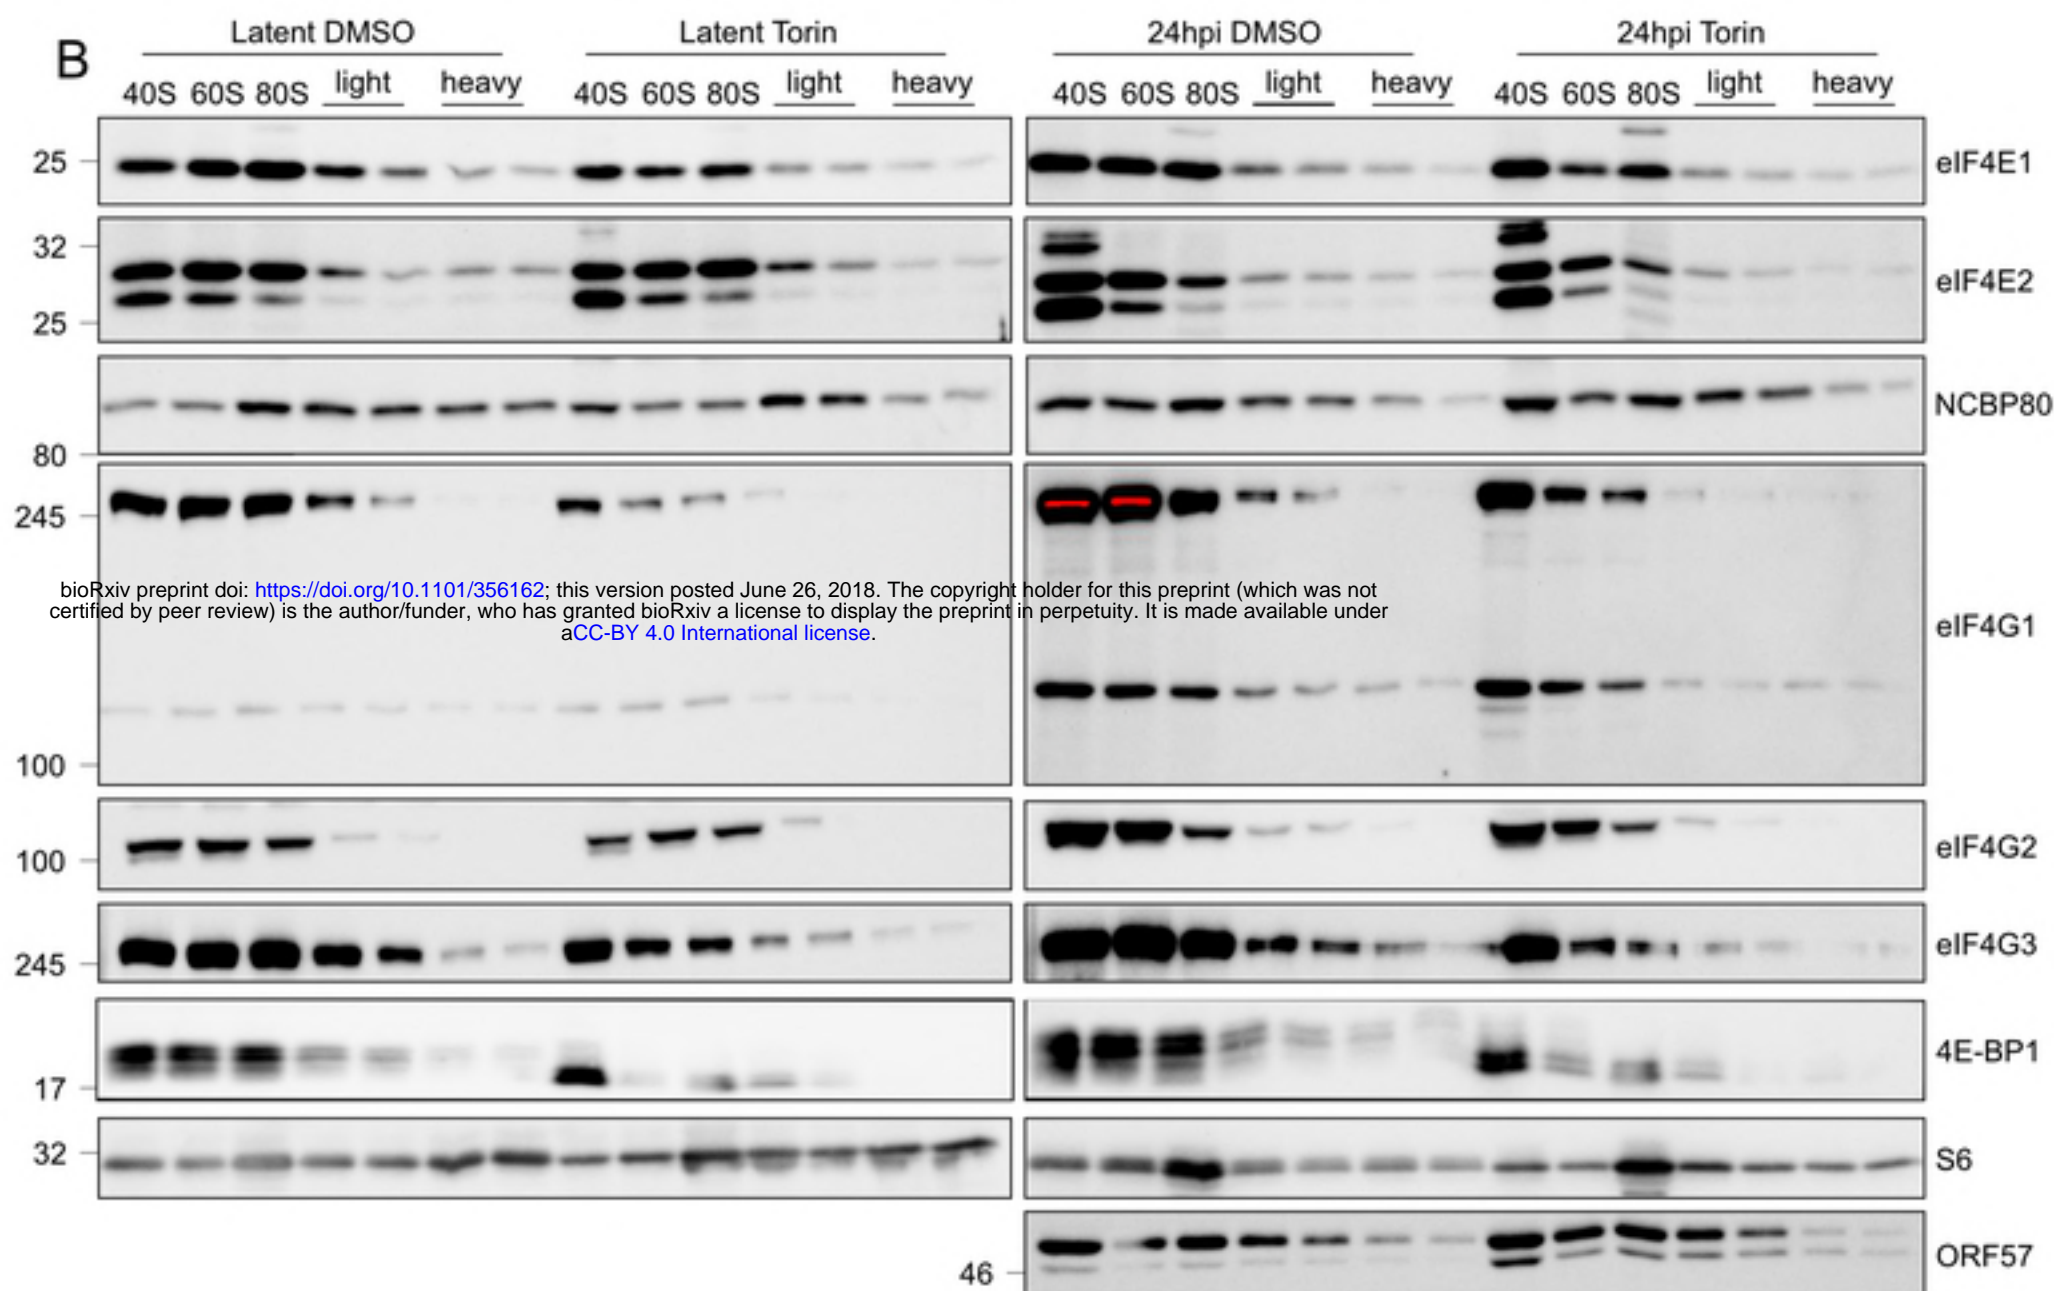

Source: https://www.biorxiv.org/content/10.1101/356162v1.full.pdf
