1 **KSHV lytic mRNA is efficiently translated in the absence of eIF4F**

2 Eric S. Pringle <sup>1,2</sup>, Carolyn-Ann Robinson <sup>3</sup>, Nicolas Crapelet <sup>4</sup>, Andrea L-A. Monjo <sup>1</sup>, Katrina  
3 Bouzanis <sup>1</sup>, Andrew M. Leidal <sup>5</sup>, Stephen M. Lewis <sup>1,2,4,6,7</sup>, Daniel Gaston <sup>2,8</sup>, James Uniacke <sup>9</sup>,  
4 Craig McCormick <sup>1,2,\*</sup>

5  
6 <sup>1</sup>Department of Microbiology & Immunology, Dalhousie University, 5850 College Street,  
7 Halifax NS, Canada B3H 4R2

8 <sup>2</sup>Beatrice Hunter Cancer Research Institute, 5850 College Street, Halifax NS Canada B3H 4R2

9 <sup>3</sup>Department of Microbiology, Immunology and Infectious Diseases, University of Calgary,  
10 Calgary AB, Canada T2N 4N1

11 <sup>4</sup>Atlantic Cancer Research Institute, 35 Providence Street, Moncton NB, Canada E1C 8X3

12 <sup>5</sup>Department of Pathology, 513 Parnassus Ave., University of California San Francisco, San  
13 Francisco CA, USA 94143

14 <sup>6</sup>Department of Chemistry and Biochemistry, Université de Moncton, Moncton NB, Canada E1A  
15 3E9

16 <sup>7</sup>Department of Biology, University of New Brunswick, Saint John NB, Canada E2L 4L5

17 <sup>8</sup>Department of Pathology, Dalhousie University, 5850 University Avenue, Halifax NS, Canada  
18 B3H 4R2

19 <sup>9</sup>Department of Molecular and Cellular Biology, University of Guelph, 50 Stone Road E.,  
20 Guelph ON, Canada N1G 2W1

21

22 \*Corresponding author: C.M., [craig.mccormick@dal.ca](mailto:craig.mccormick@dal.ca)

23

24

25 Running Title: Translational efficiency of KSHV mRNA

26

27

28

29

30 Keywords: KSHV; mTORC1; translation initiation; polysomes; RNA-seq; translational  
31 efficiency; eIF4F; eIF4E2; eIF4G2; METTL3

## 32 **ABSTRACT**

33 Herpesvirus genomes are decoded by host RNA polymerase II, generating messenger ribonucleic  
34 acids (mRNAs) that are post-transcriptionally modified and exported to the cytoplasm. These  
35 viral mRNAs have 5'-m<sup>7</sup>GTP caps and poly(A) tails that should permit assembly of canonical  
36 eIF4F cap-binding complexes to initiate protein synthesis. However, we have shown that  
37 chemical disruption of eIF4F does not impede KSHV lytic replication, suggesting that alternative  
38 translation initiation mechanisms support viral protein synthesis. Here, using polysome profiling  
39 analysis, we confirmed that eIF4F disassembly did not affect the efficient translation of viral  
40 mRNAs during lytic replication, whereas a large fraction of host mRNAs remained eIF4F-  
41 dependent. Lytic replication altered multiple host translation initiation factors (TIFs), causing  
42 caspase-dependent cleavage of eIF2 $\alpha$  and eIF4G1 and decreasing levels of eIF4G2 and eIF4G3.  
43 Non-eIF4F TIFs NCBP1, eIF4E2 and eIF4G2 associated with actively translating messenger  
44 ribonucleoprotein (mRNP) complexes during KSHV lytic replication, but their depletion by  
45 RNA silencing did not affect virion production, suggesting that the virus does not exclusively  
46 rely on one of these alternative TIFs for efficient viral protein synthesis. METTL3, an N<sup>6</sup>-  
47 methyladenosine (m<sup>6</sup>A) methyltransferase that modifies mRNAs and influences translational  
48 efficiency, was dispensable for early viral gene expression and genome replication but required  
49 for late gene expression and virion production. METTL3 was also subject to caspase-dependent  
50 degradation during lytic replication, suggesting that its positive effect on KSHV late gene  
51 expression may be indirect. Taken together, our findings reveal extensive remodelling of TIFs  
52 during lytic replication, which may help sustain efficient viral protein synthesis in the context of  
53 host shutoff.

54

## 55 **IMPORTANCE**

56 Viruses use host cell protein synthesis machinery to create viral proteins. Herpesviruses have  
57 evolved a variety of ways to gain control over this host machinery to ensure priority synthesis of  
58 viral proteins and diminished synthesis of host proteins with antiviral properties. We have shown  
59 that a herpesvirus called KSHV disrupts normal cellular control of protein synthesis. A host cell  
60 protein complex called eIF4F starts translation of most cellular mRNAs, but we observed it is  
61 dispensable for efficient synthesis of viral proteins. Several proteins involved in alternative  
62 modes of translation initiation were likewise dispensable. However, an enzyme called METTL3

63 that modifies mRNAs is required for efficient synthesis of certain late KSHV proteins and  
64 productive infection. We observed caspase-dependent degradation of several host cell translation  
65 initiation proteins during infection, suggesting that the virus alters pools of available factors to  
66 favour efficient viral protein synthesis at the expense of host protein synthesis.

67

## 68 INTRODUCTION

69 All viruses use host translation machinery to create viral proteins. Most RNA viruses replicate in  
70 the cytoplasm where they cannot access normal host mRNA processing machinery, so they must  
71 encode their own proteins to transcribe and process viral mRNAs, while accessing host factors  
72 that promote mRNA stability and enable efficient ribosome loading. Some RNA viruses have  
73 structured motifs in 5' untranslated regions (UTRs) that directly recruit the small ribosomal  
74 subunit with minimal involvement of host proteins (1). By contrast, DNA viruses, such as  
75 herpesviruses, replicate in the nucleus where they can access the full complement of host  
76 transcription machinery (2–4) Thus, herpesvirus mRNAs are transcribed by RNA polymerase II  
77 (Pol II) and processed by enzymes that add 5' m<sup>7</sup>GTP caps and 3' poly-adenylate (polyA) tails,  
78 features that promote mRNA stability and provide access to the same cap-dependent translation-  
79 initiation factors (TIF) employed by cellular mRNAs (3, 5).

80 Despite their strong resemblance to their host counterparts, herpesvirus mRNAs benefit  
81 from several advantages that confer priority access to host translation machinery. During  
82 Kaposi's sarcoma-associated herpesvirus (KSHV) latency, viral mRNAs are spliced by host  
83 machinery (6), which promotes recruitment of the human transcription/export (hTREX) complex  
84 that promotes mRNA stability and export to the cytoplasm, just as it does for host mRNAs. By  
85 contrast, most lytic KSHV mRNAs are not spliced, and hTREX recruitment requires the viral  
86 RNA-binding protein (RBP) ORF57, a homolog of HSV-1 ICP27, also known as mRNA  
87 transcript accumulation (Mta) (7–9). ORF57 RNA-binding determinants and interplay with other  
88 components of the host mRNA processing machinery remain poorly defined, but it clearly  
89 enables efficient constitutive export of unspliced viral mRNAs, providing a selective advantage  
90 over host mRNAs that require splicing and are subject to stress-regulated regulation of the  
91 splicing reaction (8). In the cytoplasm, ORF57 remains associated with these viral messenger  
92 ribonucleoprotein (mRNP) complexes following translation initiation where it supports  
93 translation of non-spliced viral mRNA (7). ORF57 is also sufficient to inhibit the formation of

94 cytoplasmic stress granules (SGs) that normally form in response to the accumulation of  
95 translationally stalled mRNP complexes (10), suggesting that it may be able to sustain ongoing  
96 protein synthesis during times of stress that would normally prohibit it. In addition to bypassing  
97 canonical splicing-dependent mRNA export mechanisms, several studies have reported extensive  
98 N<sup>6</sup>-methyladenosine (m<sup>6</sup>A) modification of KSHV mRNAs including mRNAs encoding the  
99 immediate-early gene product RTA (11–14). m<sup>6</sup>A is co-transcriptionally deposited on mRNA by  
100 the m<sup>6</sup>A “writer” enzyme, METTL3 (15–17). m<sup>6</sup>A modifications have a variety of effects on can  
101 regulate splicing, stability, secondary structure, accumulation in RNA condensates, and  
102 translation (12, 15, 18–22). These effects are promoted by m<sup>6</sup>A “reader” proteins YTH-domain  
103 and Tudor family of RNA-binding proteins (14, 23, 24).

104 In typical cell culture experiments (normoxia, rich culture media), approximately two-  
105 thirds of global protein synthesis requires eIF4F, a protein complex comprising the m<sup>7</sup>GTP cap-  
106 binding protein eIF4E1, the scaffolding protein eIF4G1 (or eIF4G3), and the eIF4A RNA  
107 helicase (1, 25–27). After the cap is bound by eIF4E1, eIF4G1/3 recruits eIF3 and the small  
108 ribosomal subunit to initiate scanning for the start codon. eIF4A with its cofactors eIF4B and  
109 eIF4H reduce secondary structure in the 5'UTR to facilitate this process (26, 27). In response to  
110 nutrients and growth signals, mechanistic target of rapamycin complex 1 (mTORC1) regulates  
111 translation initiation by promoting assembly of the eIF4F initiation complex. When  
112 unphosphorylated, repressive 4E-BP1 proteins bind to the eIF4E cap-binding protein and prevent  
113 recruitment the eIF4G1/3 scaffolding protein. mTORC1-mediated phosphorylation of 4E-BP1  
114 liberates eIF4E and enables eIF4F assembly and subsequent recruitment of the eIF3 complex and  
115 the small ribosomal subunit (1, 2, 28). mTORC1 inhibition causes widespread decreases in  
116 protein synthesis, but transcripts bearing 5' terminal oligopyrimidine (TOP) sequences (25) or  
117 pyrimidine-rich translational element (PRTE) sequences (29) at their 5' ends are especially  
118 sensitive to mTORC1. These sequences allow for association of the cap-binding protein LARP1,  
119 which sequesters the cap and limits further cap-dependent initiation (30–32). By contrast, eIF4F-  
120 independent protein synthesis mechanisms remain poorly understood, and the field is only  
121 beginning to identify and characterize TIFs involved in these processes (18, 33–35).

122 Herpesviruses from all subfamilies (alpha-, beta-, and gammaherpesviruses) have been  
123 shown to activate mTORC1 during lytic replication (36–39), but paradoxically, viral protein  
124 synthesis and virion production are largely unaffected by mTORC1 inhibition (38, 40, 41). We

125 and others have shown that eIF4F assembles and remains sensitive to the mTORC1 active-site  
126 inhibitor Torin throughout the KSHV lytic replication cycle (38, 39, 42). However, mTORC1  
127 activity was dispensable for KSHV protein synthesis and genome replication, and only modestly  
128 inhibited virion production (38). These findings suggest that translation of KSHV mRNAs has a  
129 reduced dependence on eIF4F.

130 To better understand the determinants of KSHV protein synthesis in the context of lytic  
131 replication, we used polysome profiling to measure translational efficiency (TE) of viral  
132 mRNAs. We observed that viral mRNAs readily persist in polysomes in the absence of eIF4F  
133 components eIF4G1 and eIF4G3. This finding is consistent with previous observations of robust  
134 translation of human cytomegalovirus (HCMV) mRNAs despite eIF4F disassembly (40) and  
135 suggests that non-eIF4F translation initiation mechanisms are likely sufficient to support  
136 synthesis of herpesvirus proteins. We found that pro-viral caspase activation during lytic  
137 replication (43) causes cleavage of several host TIFs, but this has no effect on rates of global  
138 protein synthesis in the low translation environment of lytic replication. We tested the  
139 contribution of TIFs that participate in non-eIF4F translation initiation mechanisms and found  
140 that NCBP1, eIF4E2, and eIF4G2 were dispensable for virion production. However, METTL3  
141 silencing, which would result in defects in m<sup>6</sup>A-dependent translation (18, 19, 44–46), caused a  
142 ten-fold loss in virion production without affecting viral genome replication. These findings  
143 suggest that viral mRNAs are efficiently recruited to ribosomes in the low-translation  
144 environment of lytic replication despite significant changes in available translation initiation  
145 factors.

146

## 147 **RESULTS**

148 **Translation of KSHV lytic mRNAs are resistant to mTOR inhibition.** Our group and others  
149 previously reported that eIF4F assembles during KSHV latency and lytic replication and remains  
150 under strict regulation by mTORC1 and 4E-BP1 (38, 39). Here, we used polysome profiling to  
151 measure how eIF4F disruption affected translational efficiency (TE) of viral mRNAs.

152 Physiologic mTORC1 activity is regulated by amino acid abundance, but mTORC1 is readily  
153 inhibited by several drugs, including the potent active site inhibitor Torin 1 (hereafter known as  
154 Torin) (42). We observed that Torin treatment of uninfected iSLK cells for 2 h prior to harvest  
155 caused dephosphorylation of ribosomal protein S6 and 4E-BP1 as expected, which was likewise

156 evident in latently KSHV-infected iSLK.219 cells, or cells which had been treated with  
157 doxycycline (dox) for 48 h to activate the lytic cycle (Fig. 1A). In these experiments, we  
158 reactivated iSLK.219 cells with doxycycline only; we omitted the HDAC inhibitor sodium  
159 butyrate that is commonly used to promote lytic reactivation in an attempt to limit potentially  
160 confounding effects of epigenetic regulation of transcription by histone acetylation. Under these  
161 conditions, many of the iSLK.219 cells either fail to reactivate or undergo abortive replication.  
162 Nevertheless, it remains clear that mTORC1 regulation of canonical target proteins S6 and 4E-  
163 BP1 remain largely intact during latent and lytic phases of KSHV replication (Fig. 1A).

164 We observed that Torin treatment of uninfected iSLK cells shifted mRNAs from  
165 efficiently translated heavy polysomes to poorly translated sub-polysomal fractions (Fig. 1B)  
166 consistent with studies of other cell types (25, 40). Latently infected iSLK.219 cells treated with  
167 Torin displayed a similar shift of mRNA into sub-polysomal fractions. After 48 h of dox  
168 treatment, the heavy polysomes were depleted, likely due to host shutoff in lytic cells (47) and  
169 the depletion of the media over the incubation time in cells in which KSHV failed to reactivate  
170 from latency (Fig. 1B). In this population, Torin treatment further depleted the heavy polysome  
171 fractions, although the effects were modest, likely due to the pre-existing low translation  
172 environment in these cells.

173 To measure the effects of mTORC1 inhibition on the TE of viral and host mRNAs during  
174 the KSHV lytic cycle, we isolated RNA from polysome fractions from Torin- and vehicle-treated  
175 48 h post-dox cells (Fig. 1B, bottom panel), and processed it for RNA sequencing. We assessed  
176 TE by division of the number of reads isolated from the polysomes compared to the reads found  
177 in the total RNA fraction ( $\#$  of reads polysome /  $\#$  of reads total). The abundance of KSHV  
178 transcripts differed by as much as 100,000-fold with ten-fold more of the non-coding PAN RNA  
179 than the next most abundant RNA. The most abundant protein-coding viral mRNAs encode the  
180 ORF59 processivity factor, Kaposin (K12), vIL-6 (K2), and the viral dUTPase-like gene ORF11  
181 (Fig. 2A) (3, 48). The TE of viral mRNAs appeared to be generally similar to cellular mRNAs,  
182 although assessment of cellular mRNAs is complicated in this system because they are derived  
183 from a mixed population of lytically-replicating cells and non-reactivated cells. Consistent with  
184 the literature, we observed alterations in TE of cellular mRNAs in the presence of Torin, with  
185 populations of mRNAs displaying increased or decreased TE (Fig. 2B). We scored the difference  
186 in translational efficiencies by using a sliding-window to calculate a Z-score of each detected



187 transcript compared to the surrounding 200 transcripts of similar abundance as measured by  
188 count per million (CPM) (49, 50). The  $\Delta$ TE of the majority of viral mRNAs (~90%) was not  
189 inhibited or enhanced by a conservative Z-score of 1 (Fig. 2B, Z-score within 1 SD of the mean  
190 in blue, Z-score > 1 SD of the mean in red), suggesting that the TE of viral transcripts is likely  
191 not regulated by the mTORC1/4E-BP/eIF4F axis.

192 We analysed transcripts with a greater than 1.5-fold change in TE using the Panther GO-  
193 Slim Molecular Function analysis (Fig. 2C). Both ribosomal structural proteins and TIF were  
194 over-represented in host cell transcripts with reduced TE following Torin treatment, consistent  
195 with previous studies (25, 29), which suggests that TOP-containing transcripts are regulated by  
196 mTORC1 as expected during KSHV lytic replication. By contrast, host transcripts with increased  
197 TE following Torin treatment did not group into any clear molecular function. Because we  
198 mapped RNA-seq reads by individual transcripts rather than genes, we could detect a slight yet  
199 significant ( $p < 0.0001$ ) enrichment of normally labile pseudogene mRNAs in high TE groups,  
200 and their corresponding diminishment in low TE groups (Fig. 2D). Rather than reflecting  
201 changes in TE of pseudogene mRNAs, we suspect this result could be explained by  
202 accumulation of ribosomes due to halted elongation while the mRNA is processed by nonsense-  
203 mediated decay (NMD) and other ribosomal quality control processes (reviewed in (51)).

204  
205 **eIF4F disassembly does not deplete viral mRNAs from polysomes.** We corroborated our  
206 findings of eIF4F-independent efficient translation of viral mRNAs in the primary effusion  
207 lymphoma (PEL)-derived TReX-BCBL1-RTA cell model; these cells reactivate efficiently in  
208 response to dox treatment compared to iSLK.219 cells, which helps reduce confounding effects  
209 of failed lytic reactivation. Furthermore, the lytic cycle proceeds more quickly in TReX-BCBL1-  
210 RTA cells, with robust virion production achieved by 48 hpi (38). TReX-BCBL1-RTA cells  
211 were reactivated with dox for 24 h and treated with Torin or vehicle control for the final 2 h or  
212 replication before lysis and polysome profiling. We isolated mRNA from sub-polysome, light  
213 polysome, and heavy polysome fractions and performed RT-qPCR on select mRNAs to  
214 determine their distribution across the polysome profile as an alternative measure of TE (52).  
215 Consistent with observations in the iSLK.219 cells (Fig. 1B), Torin treatment of lytic TReX-  
216 BCBL1-RTA cells caused a moderate shift of bulk mRNA from polysomes to sub-polysomal  
217 fractions (Fig. 3A). We used RT-qPCR to measure the distribution of cellular and viral mRNAs

218 in polysomes or lighter fractions. Torin treatment caused shifted  $\beta$ -actin mRNA from heavy  
219 polysomes to monosome and sub-monosome fractions (Fig. 3B). However, a significant  
220 proportion of translating  $\beta$ -actin mRNA remained in the polysome fractions despite Torin  
221 treatment. By contrast, Torin treatment caused the TOP-mRNAs encoding Rps20 and RACK1 to  
222 completely shift from polysome fractions to sub-polysome and monosome fractions. This is  
223 consistent with the RNA-seq analysis and confirms that TOP mRNAs remain susceptible to  
224 eIF4F disassembly during the lytic cycle.

225 Historically, the contribution of monosomes to global protein synthesis has been  
226 overlooked, but recent ribosomal foot-printing studies have revealed that monosomes contain  
227 translationally active mRNAs, notably including unusual mRNAs with short open reading frames  
228 (ORFs), up-stream ORFs (uORFs), or low initiation rates (53). We observed that mRNAs  
229 encoding VEGF-A and IL6, two cytokines with significant contributions to KSHV pathogenesis  
230 (54–56), were abundant in monosome fractions despite abundant VEGF-A and IL6 in  
231 supernatants from lytic TReX-BCBL1-RTA cells (38); this suggests that monosomes may make  
232 significant contributions to translation of these cytokines during lytic replication. We also  
233 analyzed the polysomal distribution of viral mRNAs from all three transcriptional classes: Latent  
234 (LANA, Kaposin), early (ORF11, ORF45, vIL-6), and late (K8.1, ORF26, ORF65). The TE of  
235 all viral mRNAs tested generally seemed to resist Torin inhibition, but a slight shift towards the  
236 sub-polysomal fractions can be detected (Fig. 4B). Combined with our previous assessments in  
237 iSLK.219 cells (Fig. 2B), these findings suggest that during KSHV lytic replication, host cell  
238 transcripts are regulated by the mTORC1-4EBP1-eIF4F signalling axis as expected, whereas  
239 viral transcripts are not.

240

241 **Translation initiation factors eIF2 $\alpha$  and eIF4G1 are cleaved by caspases during lytic**  
242 **replication.** Activation of pro-apoptotic caspase-3 and caspase-8 during KSHV lytic replication  
243 limit interferon (IFN) production and promote virus replication (43). Paradoxically, this caspase  
244 activation does not contribute to apoptosis, likely due to the actions of viral anti-apoptotic  
245 proteins vFLIP, vBcl2, and K7 (57–59). In uninfected cells, caspases also cleave the translation  
246 initiation factors (TIF) eIF2 $\alpha$  and eIF4G1, which may limit protein synthesis during apoptosis  
247 (60, 61). We hypothesized that caspase-dependent cleavage of TIFs might contribute to host  
248 shutoff and eIF4F-independent translation of KSHV mRNAs during the lytic cycle. Indeed,



249 TREx-BCBL1-RTA cells reactivated with dox displayed a decrease in total eIF4G1 abundance  
250 consistent with caspase-3 activation and eIF4G1 cleavage during lytic replication (Fig. 4A; (62)).  
251 We also observed faster-migrating protein species that reacted with anti-eIF2 $\alpha$ , -eIF4G2, and -  
252 ORF57 antibodies, all of which were previously described caspase substrates (60, 63, 64). To  
253 confirm caspase activation during KSHV lytic replication, we reactivated TREx-BCBL1-RTA  
254 cells with dox in the presence of a pan-caspase inhibitor IDN-6556 or vehicle control; we  
255 observed the accumulation of cleaved caspase-3 over a 48 h time course, which was sensitive to  
256 IDN-6556 (Fig. 4B). Caspase inhibition also prevented the degradation of eIF4G1 and cleavage  
257 of eIF2 $\alpha$  and ORF57. Loss of ORF57 cleavage with IDN-6556 also supports the notion that  
258 caspases are active in lytic cells and not only in those latently infected or undergoing abortive  
259 infection. We measured global protein synthesis using a ribopuromycinylation assay whereby  
260 puromycin is incorporated into elongating polypeptides where it can be subsequently detected  
261 using an anti-puromycin antibody (65). Similar to previous reports, we observed a clear decrease  
262 in global protein synthesis during KSHV lytic replication (38, 66, 67) which was unaffected by  
263 caspase inhibition (Figs. 4B, 4C). We conclude that TIF degradation by caspases does not  
264 contribute to host shutoff.

265  
266 **eIF4F disassembly selectively displaces host translation initiation factors from polysomes**  
267 **during KSHV latency and lytic replication.** Considering the evidence for eIF4F-independent  
268 translation of KSHV mRNAs and caspase-mediated TIF remodeling, we reasoned that  
269 alternative TIFs could play an important role in supporting efficient synthesis of lytic proteins.  
270 As a first step in this investigation, we profiled TIF recruitment to polysomes during lytic  
271 replication and whether these components could be displaced by mTORC1 inhibition. TREx-  
272 BCBL1-RTA cells were once again reactivated with dox for 22 h and treated with Torin for 2 h  
273 prior to lysis and polysome profiling. Consistent with our previous findings, mTORC1 inhibition  
274 caused dephosphorylation of canonical substrates S6 and 4E-BP1, both during latency and lytic  
275 replication (Fig. 5A). Once again, lytic replication in TREx-BCBL1-RTA cells caused a bulk  
276 shift of mRNAs from polysomes to sub-polysomal fractions, with the residual translation  
277 remaining sensitive to mTORC1 inhibition and eIF4F disassembly (Fig. 5B). We assessed the  
278 proteins associated with polysomes by immunoblotting proteins harvested from gradient  
279 fractions using a low-salt lysis buffer to aid retention of eIF4F components and other RBPs,

280 consistent with previous ribosome isolation protocols (68, 69). Fractions were isolated from the  
281 40S, 60S, and 80S sub-polysomal peaks, as well as light and heavy polysomes; RNA and  
282 associated proteins were precipitated using ethanol and a glycogen co-precipitant.

283 Additional m<sup>7</sup>GTP cap-binding proteins beyond the canonical eIF4E1 protein include  
284 nuclear cap-binding protein subunit 1 (NCBP1), which promotes pioneer translation on newly  
285 transcribed mRNA (34), and eIF4E2, which contributes to global protein synthesis at physiologic  
286 oxygen tension and is strictly required for hypoxic translation (33). We observed that eIF4E1,  
287 eIF4E2 and NCBP1 associated with polysomes in all conditions tested, as expected (Fig. 5C).  
288 Torin treatment caused a progressive loss of eIF4F components eIF4G1 and eIF4G3 from  
289 polysome fractions (Fig. 5C), consistent with displacement of eIF4G from the eIF4F complex by  
290 hypophosphorylated 4E-BP1 (Fig. 5A). However, eIF4G2, which was found primarily in the 80S  
291 monosome peak and sub-monosomal fractions, was unaffected by mTORC1 inhibition. eIF4G2  
292 may function as an eIF4G1-like factor for cap-dependent translation of mRNA that directly bind  
293 to eIF3 protein eIF3d (70). We noted a striking accumulation of a faster migrating species of  
294 eIF4G1 in lytic cells that matches a previously reported 120 kDa caspase-3 cleavage fragment  
295 (62), consistent with our observation of eIF4G1 cleavage by caspases in these cells (Fig. 4B).  
296 Interestingly, this 120 kDa eIF4G1 fragment remained associated with polysomes in Torin-  
297 treated cells, whereas full-length eIF4G1 is lost (Fig. 5C). Hyper-phosphorylated 4E-BP1 was  
298 associated with polysomes in vehicle-treated samples, consistent with previous reports of 4E-  
299 binding proteins co-sedimenting with polysome fractions (71). Hypophosphorylated 4E-BP1 was  
300 found in sub-polysomal fractions of Torin-treated cells in both the latent and lytic cell  
301 populations. This data is consistent with destabilization of eIF4G-eIF4E complexes upon cap  
302 binding and dynamic disassembly of eIF4F after initiation, as hypothesized by Merrick (2015)  
303 (27). Finally, consistent with previous reports (7), the lytic KSHV mRNA binding protein  
304 ORF57 was associated with mRNAs in polysomes, and remained associated following mTORC1  
305 inhibition (Fig. 5C). Taken together, these findings indicate that even though mTORC1 is active  
306 and eIF4F is assembled during lytic replication, viral mRNAs can be efficiently translated  
307 despite eIF4F depletion. Moreover, these experiments provide evidence for remodeling of  
308 polysome- and monosome-associated mRNP complexes during lytic replication.

309 We next used RNA silencing to test the potential contributions of eIF4E2, eIF4G2, and  
310 NCBP1 on virus replication, all of which could potentially support translation of viral mRNA

311 either constitutively or when eIF4F is limited. However, knockdown of these factors had no  
312 effect on virus replication in the presence of absence of mTORC1 inhibition (Fig 6), consistent  
313 with our previous observations that KSHV virion production has a limited requirement for  
314 mTORC1 activity once early gene expression is established (38). We further tested the  
315 requirement of eIF4E2 on KSHV replication during hypoxia. During hypoxia, regulated in  
316 development and DNA damage response 1 (REDD1) normally promotes the inhibitory activity  
317 the tuberous sclerosis complex (TSC) on mTORC1 (72), an action which could potentially be  
318 antagonized by viral mTORC1-activating proteins. However, we observed that KSHV replicated  
319 equally well in TREx-BCBL1-RTA cells in hypoxic conditions as it did in normoxia, and  
320 eIF4E2 was dispensable, even when eIF4F was depleted (Fig. 6, top panels). This suggests that  
321 KSHV is competent to complete its replication cycle during hypoxia and able to utilize an  
322 eIF4E2- or an eIF4F<sub>H</sub>-independent mechanism to support viral protein synthesis.

323

324 **METTL3 is required for virion synthesis but not genome replication.** N<sup>6</sup>-methyladenosine  
325 modification (m<sup>6</sup>A) of RNA can stimulate mRNA translation by either recruiting eIF3 and the  
326 small ribosomal subunit directly, or by the actions of m<sup>6</sup>A reader proteins (18, 19, 44). Many  
327 KSHV mRNAs are modified with m<sup>6</sup>A and these modifications likely affect the fate of transcript  
328 (11–14). The m<sup>6</sup>A methyltransferase METTL3 and the m<sup>6</sup>A reader YTHDC2 have been shown  
329 to affect KSHV virion production, but with conflicting results in different systems (11, 13). We  
330 found that METTL3 protein levels were reduced by 24 hpi in TREx-BCBL1-RTA cells (Fig.  
331 7A). However, despite being reduced at the protein level during lytic replication, RNA silencing  
332 of METTL3 diminished virion output by 10-fold (Fig. 7B). Viral genome replication was  
333 unperturbed by METTL3 silencing (Fig. 7C), but accumulation of early proteins ORF45 and  
334 ORF17 and the late protein ORF65 were disrupted. ORF57 accumulates normally when  
335 METTL3 is absent, suggesting that m<sup>6</sup>A is not required for translation of ORF57. Similarly,  
336 ORF59, which requires ORF57 binding for mRNA export (73, 74), accumulates normally in  
337 METTL3 knockdown, suggesting that m<sup>6</sup>A is not required for ORF57 association with mRNA  
338 (Fig. 7A). Thus, in our hands, METTL3 is required for efficient synthesis of certain KSHV  
339 proteins and virion production in the TREx-BCBL1-RTA cell system.

340 In the course of studying the effects of m<sup>6</sup>A RNA modifications during KSHV infection,  
341 Hesser et al., (2018) (13) and Tan et al., (2017) (11) used the histone deacetylase (HDAC)

342 inhibitor sodium butyrate (NaB) to enhance lytic reactivation in iSLK.219 cells; Hesser et al.,  
343 (2018) (13) also used the phorbol ester TPA in m<sup>6</sup>A studies using TREx-BCBL1-RTA cells for  
344 similar reasons. In our experiments, we exclusively used doxycycline to reactivate the TREx-  
345 BCBL1-RTA cells in an attempt to eliminate broad confounding effects of HDAC inhibitors and  
346 phorbol esters. We reactivated TREx-BCBL1-RTA cells and iSLK.219 cells with dox in similar  
347 conditions and confirmed a decrease in METTL3 abundance (Fig. 8A, 8B). Because the  
348 immediate early KSHV lytic switch protein RTA is a SUMO-dependent E3 ubiquitin ligase  
349 (STUbL), and METTL3 has been reported to be sumoylated (75, 76), we hypothesized that RTA  
350 may promote proteasome-dependent degradation of METTL3. We tested this hypothesis using  
351 parental iSLK cells that express RTA from a dox-inducible promoter but lack KSHV episomes.  
352 Treatment of iSLK cells with dox caused RTA accumulation but had no effect on METTL3  
353 protein levels (Fig. 8C). Furthermore, inhibiting proteasome function with MG132 increased  
354 levels of RTA (indicating that the proteasome controls RTA protein turnover), but had no effect  
355 on METTL3 protein levels in the presence or absence of RTA, demonstrating that METTL3 is  
356 not constitutively degraded by the proteasome. By contrast, treatment of TREx-BCBL1-RTA  
357 cells with the caspase inhibitor IDN-6556 sustained METTL3 protein levels at later stages of  
358 lytic replication (Fig. 8D), which indicates that METTL3 is another substrate for caspase-  
359 mediated cleavage during KSHV lytic replication.

360

## 361 **DISCUSSION**

362 KSHV mRNAs broadly resemble their cellular counterparts which should allow their  
363 recruitment to ribosomes in an eIF4F-dependent manner. Here, we demonstrate that activation of  
364 caspases during lytic replication degrades TIFs, yet this has no effect on protein synthesis after  
365 host shutoff. The remaining eIF4G1 and eIF4G3 are effectively recruited to polysomes in an  
366 mTORC1- and eIF4F-dependent manner. These heavily-translated mRNPs contain viral mRNA,  
367 which remain in these fractions when eIF4F is depleted, suggesting that viral mRNAs do not  
368 require eIF4F for efficient translation initiation. These observations are consistent with reports  
369 from Lenarcic, et. al. (2014)(40), who demonstrated that mTORC1 is dispensable for HCMV late  
370 protein synthesis and that Torin had little effect on TE of viral mRNAs. They also support our  
371 previous findings that eIF4F disassembly does not impede KSHV replication and virion  
372 production (38). Together, these observations suggest that resistance to eIF4F loss might be a

373 general feature of herpesvirus translation, even for viruses like HCMV that do not shut off host  
374 gene expression. Moreover, our study indicates that mTORC1 and eIF4F maintain broad roles in  
375 global translation regulation during KSHV lytic replication. Torin treatment depletes heavy  
376 polysomes during lytic replication and shifts TOP-containing mRNAs encoding ribosomal  
377 proteins and TIFs into sub-polysomal fractions. The most recent and thorough efforts to map  
378 KSHV mRNA 5'-ends have not identified any TOP sequences (3, 5), which is consistent with  
379 the idea that they could be efficiently translated despite mTORC1 inhibition.

380 Our polysome RNA-Seq analysis was restricted to heavy translating polysomes, but there  
381 is emerging evidence that light polysomes and monosomes also make important contributions to  
382 bulk protein synthesis (53, 77). While we could detect almost the entire viral transcriptome in  
383 heavy polysome fractions, subsequent RT-qPCR measurements of select viral transcripts  
384 revealed broad distribution across gradient fractions. Two notable exceptions were the  
385 K12/Kaposin and LANA mRNAs, which were largely restricted to sub-polysomal fractions.  
386 Both of these transcripts are spliced and encode multiple proteins via complex translational  
387 programs that include leaky ribosomal scanning mechanisms of initiation (78, 79). They also  
388 have long stretches of repeats that may impede efficient translation. For example, polyproline  
389 motifs are slowly decoded by elongating ribosomes (80), and protein products of Kaposin  
390 mRNAs feature numerous polyproline motifs (78). We speculate that preponderance of Kaposin  
391 mRNAs in sub-polysome fractions could result from close proximity of polyproline-encoding  
392 sequences to the several start codons on this mRNA, which could slow elongating ribosomes and  
393 prevent or slow assembly of subsequent 80S complexes. The emerging role of monosome  
394 translation in controlling the synthesis of highly regulated proteins should be considered in future  
395 investigations of KSHV lytic gene expression.

396 Several studies have reported m<sup>6</sup>A modification of KSHV mRNA, and m<sup>6</sup>A modification  
397 of RTA is required for proper splicing and stability (11–14). However, the precise roles for m<sup>6</sup>A  
398 modifications and m<sup>6</sup>A reader proteins in the biogenesis and fate of KSHV mRNA other than  
399 RTA remain to be discovered and may be dependent on cell type and different chemical stimuli  
400 of lytic reactivation (13). N<sup>6</sup>-methyladenosine (m<sup>6</sup>A) dependent translation initiation has been  
401 shown to contribute to residual translation following eIF4F disassembly in normoxia (19).  
402 Unlike HCMV, we found that METTL3 is degraded by caspases during KSHV lytic replication  
403 (81, 82). While this may preclude a significant role for m<sup>6</sup>A modification as a global mechanism

404 of translation of viral mRNA, this modification has nevertheless been found to be widely  
405 distributed across the genome (14). The effects of m<sup>6</sup>A on virus titer might largely be explained  
406 by a Type-I IFN response. Loss of m<sup>6</sup>A marks on IFN-β mRNA promotes stabilization of the  
407 transcript and leads to the accumulation of ISGs (81, 82). Additionally, we expect the wide  
408 effects of METTL3 depletion on global transcription (83) likely have pleiotropic effects on  
409 normal viral replication.

410 During Torin treatment, both the TOP-containing transcript Rps20 and the non-TOP -β-  
411 actin transcript were depleted from polysome fractions that retained viral mRNA. In these same  
412 fractions eIF4G1 and eIFG3 are also lost, but ORF57 is retained. ORF57 and related herpesvirus  
413 homologues (EBV EB2 and HSV1/2 ICP27) have previously been shown to interact with  
414 initiation factors, and can be found in polysomes (84, 85). In our experiments, loss of eIF4G  
415 from polysomes with Torin treatment suggested that ORF57-dependent recruitment of eIF4G to  
416 viral mRNA was not required for their translation, yet ORF57 is clearly present in the same  
417 fractions as viral mRNA and is not displaced with eIF4F loss. This data suggests that while  
418 mTORC1 is active during KSHV lytic, it is not required for the translation of viral mRNA.  
419 While eIF4F is assembled during lytic replication, it is not required for the association of viral  
420 mRNA with the polysomes. Alternative translation initiation factors, including eIF4E2, eIF4G2,  
421 NCBP1, and eIF3d are also not required for virion production. Similarly, m<sup>6</sup>A is not required for  
422 the translation of ORF57 mRNA. However, ORF57 remains associated with the polysomes in  
423 the absence of eIF4F. It is possible that ORF57, or other viral factors are required for KSHV  
424 translation initiation, but the complement of host and viral proteins associating with translating  
425 mRNA during lytic replication is unknown.

426

## 427 **METHODS**

428 **Cell culture and inhibitors.** TREx-BCBL1-RTA cells (86) were cultured in RPMI\*1640  
429 supplemented with 10% vol/vol heat-inactivated fetal bovine serum (Gibco), 5 mM L-glutamine,  
430 and 50 μM β-mercaptoethanol. 293T cells, iSLK and iSLK.219 cells (a kind gift from Don  
431 Ganem, (87)) were cultured in DMEM with 10% FBS, 5 mM L-Glutamine. Cells were  
432 maintained at 37°C at 5% CO<sub>2</sub> using standards. All cells were maintained in 100 I/U of both  
433 penicillin and streptomycin. iSLK.219 cells were cultured with 10 mM puromycin  
434 (ThermoFisher Scientific) to maintain episome copy number of rKSHV.219. Puromycin was



435 omitted from cells seeded for experiments. Expression of the RTA transgene and lytic  
436 reactivation in both the TReX-BCBL1-RTA and iSLK.219 was stimulated by treating the cells  
437 with 1 µg/mL doxycycline. For hypoxia experiments, cells were placed in a Hypoxia Incubation  
438 Chamber (StemCell); the chamber was purged with nitrogen at 2 psi for 5 min prior to sealing.  
439 15 mM HEPES was added to the media in all hypoxia experiments to maintain media pH.  
440 mTORC1 was inactivated by addition of 250 nM Torin (42) (Toronto Chemicals) in 0.1%  
441 vol/vol DMSO. Caspases were inhibited with 10 µM IDN-6556 (Selleckchem) in 0.1% vol/vol  
442 DMSO as described in (43).

443

444 **Western blotting.** TReX-BCBL1-RTA suspension cultures were collected by centrifugation at  
445 1,500 x g, washed with ice-cold PBS, pelleted again, then lysed in 2x Laemmli buffer (4%  
446 [wt/vol] sodium dodecyl sulfate [SDS], 20% [vol/vol] glycerol, 120 mM Tris-HCl [pH 6.8]).  
447 iSLK and iSLK.219 cells were washed once with ice-cold PBS then lysed with 2x Laemmli  
448 buffer directly in the well. DNA was sheared by repeated pipetting with a fine-gauge needle  
449 before 100 mM dithiothreitol (DTT) addition and boiling at 95°C for 5 min. Samples were stored  
450 at -20°C until analysis. Total protein concentration was determined by DC protein assay (Bio-  
451 Rad) and equal quantities were loaded in each SDS-PAGE gel. Gels were transferred using to  
452 polyvinylidene difluoride (PVDF) membranes (Bio-Rad) with the Trans-Blot Turbo transfer  
453 apparatus (Bio-Rad). Membranes were blocked with 5% bovine serum albumin TBS-T (Tris-  
454 buffered saline, 0.1% [vol/vol] Tween) before probing overnight at 4°C with the following  
455 antibodies: 4E-BP1 (Cell signaling technologies [CST] #9644), β-actin (CST #5125 or CST  
456 #4970), cleaved caspase 3 (CST #9664), eIF2α (CST #9722), eIF4E1 (#2067), eIF4E2 (GeneTex  
457 GTX103977), eIF4G1 (CST #2858), eIF4G2 (CST #5169), eIF4G3 (GeneTex GTX118109),  
458 METTL3 (CST #96391), myc (CST #2276), NCBP1 (Abcam ab42389), Rps6 (S6; CST #2217)  
459 phosphoSer235/6-Rps6 (CST #4858), ORF45 (ThermoFisher MA5-14769), ORF57 (Santa Cruz  
460 Biotechnologies sc-135746), Kaposin (a kind gift from Don Ganem), LANA (a kind gift of Don  
461 Ganem), RTA (a kind gift from David Lukac), ORF65 (a kind gift S.-J. Gao), ORF17 (a kind gift  
462 from Charles Craik). Secondary antibodies HRP-conjugated for mouse (CST 7076) or rabbit  
463 (CST 7074) were used with Clarity-ECL chemiluminescence reagent (Bio-Rad) for detection.  
464 All blots were imaged on a Bio-Rad ChemiDoc-Touch system. Molecular weights were  
465 determined using protein standards (New England Biolabs P7712, or P7719). Puromycin

466 incorporation assays were performed essentially as described in (38). Briefly, TREx-BCBL1-  
467 RTA cells were treated with 10  $\mu\text{g}/\text{mL}$  puromycin 10 min prior to harvest as described above.  
468 Western blots for puromycin were run on 12% TGX Stain-Free FastCast acrylamide (Bio-Rad)  
469 according to the manufacturer's instructions. Puromycin incorporation was detected using an  
470 anti-puromycin antibody (EMD Millipore MABE43). For quantitative analysis, puromycin  
471 signal was compared to the Stain-Free total protein signal.

472

473 **Polysome Isolation.** Polysomes were isolated by ultracentrifugation of cytosolic lysate through a  
474 7-47% wt/vol linear sucrose gradient in high salt (20 mM Tris HCl, 300 mM NaCl, 25 mM  
475  $\text{MgCl}_2$  in DEPC-treated or nuclease-free water) or low salt (15 mM Tris HCl, 50 mM KCl, 10  
476 mM  $\text{MgCl}_2$ ) lysis buffer with RNase and protease inhibitors, as described in (52). High salt  
477 conditions were used to isolate RNA from gradients and low salt conditions were used for  
478 isolating proteins. Gradients were prepared using manufactures' settings on a Gradient Master  
479 108 (Biocomp). For each gradient,  $\sim 8 \times 10^6$  iSLK.219 or  $1.3 \times 10^7$  TREx-BCBL-RTA cells were  
480 seed. Cells treated with 100  $\mu\text{g}/\text{mL}$  cycloheximide (CHX, Acros Organics or Sigma) for three  
481 min prior to harvest. Cells were washed with ice-cold PBS and scraped in a tube containing the  
482 spent media and PBS wash. The cells were pelleted by centrifugation for 5 min at 500 x g and  
483 washed again with ice-cold PBS. Cell pellets were resuspended in lysis buffer (high or low salt  
484 buffer, with 1% v/v Triton X-100, 400 units/ml RNaseOUT (Invitrogen), 100  $\mu\text{g}/\text{mL}$  CHX, and  
485 protease and phosphatase inhibitors) for 10 min on ice. Lysate was centrifuged for 10 min at  
486 2,300 x g the supernatant was transferred to a new tube and centrifuged for 10 min at 15,000 x g.  
487 The supernatant was overlaid on sucrose gradients. Gradients were centrifuged at 39,000 rpm for  
488 90 min on a SW-41 rotor. The bottom of the centrifuge tube was punctured, and 60% wt/vol  
489 sucrose was underlain by syringe pump in order to collect 500  $\mu\text{L}$  or 1 mL fractions from the top  
490 of the gradient with simultaneous  $A_{260}$  measurement using a UA-6 detector (Brandel, MD).  
491 Polysome sedimentation graphs were generated with Prism8 (GraphPad).

492

493 **RNA-Seq Analysis of Polysome Fractions.** Total RNA or pooled fractions from heavy  
494 polysomes were isolated using Ribozol (Amresco) or Trizol (ThermoFisher) using standard  
495 procedures, except the precipitant in the aqueous fraction was isolated using a RNeasy column  
496 (Qiagen). mRNA was isolated from these total fractions using polyA enrichment (Dynabeads

497 mRNA DIRECT Micro Purification Kit, ThermoFisher) according to the manufacturers'  
498 protocol, then library preparation was performed with Ion Total RNA-Seq Kit v2.0  
499 (ThermoFisher). Library size, concentration, and quality was assessed using a 2200 TapeStation  
500 (Agilent). Libraries were sequenced on Proton sequencer (ThermoFisher) with a PI chip and the  
501 Ion PI Hi-Q Sequencing 200 Kit for 520 flows. Ion Torrent reads were processed using  
502 combined Human Hg19 and KSHV (Accession GQ994935) reference transcriptomes. The  
503 KSHV genome was manually re-annotated with the transcript definitions from KSHV2.0 (3)  
504 reference transcriptome and the Quasi-Mapping software Salmon (88). Normalized counts per  
505 million (cpm) were estimated for individual transcripts using the R package limma (89). Two  
506 biological replicates were combined as a geometric mean (49). The transcripts were ordered by  
507 abundance and the mean, standard deviation (SD), and Z-score were calculated using a sliding  
508 window of 200 transcripts of similar abundance (49, 50). The most abundant 100 and the least  
509 abundant 100 transcripts used the mean and SD of the adjacent bin. Translational efficiency (TE)  
510 of a transcript treatment was determined by the formula  $TE = \log_2(\text{polysome}/\text{total})$ . The change  
511 in translational efficiency (DTE) =  $TE_{\text{Torin}} - TE_{\text{DMSO}}$ .

512  
513 **Polysome RT-qPCR.** TREx-BCBL1-RTA were reactivated with 1  $\mu\text{g}/\text{mL}$  doxycycline for 24h.  
514 Torin or DMSO was added two hours prior to harvest in high salt lysis buffer as described above.  
515 Fractions were mixed 1:1 with Trizol and isolated as per manufacturer's directions except that  
516 30-60  $\mu\text{g}$  of GlycoBlue Co-Precipitant (Ambion) and 100 ng of *in vitro* transcribed luciferase  
517 DNA (NEB T7 HiScribe) was added to the aqueous fractions during isopropanol precipitation  
518 (52). The resulting pellet was resuspended in water and reverse transcribed with random primers  
519 (Maxima H, ThermoFisher). mRNA was normalized to luciferase spike to control for recovery.  
520 The quantity of mRNA detected in a given fraction was then calculated as a percentage of the  
521 total detected in all fractions. The RNA recovery was controlled by subtracting the  $C_T$  of the  
522 luciferase spike, which was assumed to be constant, from the target  $C_T$ . This  $\Delta C_T$  value for each  
523 fraction was then subtracted from the  $\Delta C_T$  of the top fraction of the gradient to determine the  
524  $\Delta\Delta C_T$ . And transcript abundance (Q) was then calculated ( $Q=2^{\Delta\Delta C_T}$ ) for each fraction and all  
525 fractions were summed. The total quantity of a transcript is represented as a proportion of the  
526 total amount of detected transcript as per (52). Transcript quantities from the light, heavy, and  
527 sub-polysomal fractions were grouped and summed for statistical analysis. Primer sequences are

528 listed in Table 1. Due to common usage of polyA signals and nesting of the viral genome, qRT-  
529 PCR primers could amplify mRNA originating from more than one viral promoter (3). For  
530 simplicity, PCR products are referred to by the mRNA coding region targeted by the primers.

531

532 **Polysome Western blot.** 500  $\mu$ L fractions of sucrose gradient mixed with 45  $\mu$ g of GlycoBlue  
533 and 1.5 mL of 100% ethanol and incubated overnight at  $-80^{\circ}\text{C}$ . Fractions were centrifuged at  
534  $15,000 \times g$  for 15 min at  $4^{\circ}\text{C}$ . Supernatant was decanted and the pellet was washed 70% v/v  
535 ethanol made with RNAase-free water. Residual ethanol was dried at  $95^{\circ}\text{C}$  and the pellet was  
536 resuspended in 1x Laemmli buffer with 100 mM DTT then boiled at  $95^{\circ}\text{C}$  for 5 min prior to  
537 SDS-PAGE.

538

539 **Gene Ontology Analysis.** Gene lists were searched for statistical over-representation for  
540 molecular functions, using the PANTHER Classification System ([www.pantherdb.org](http://www.pantherdb.org), (90)).  
541 Lists were compared against the complete database using a Fisher's exact test, with a 1% FDR.  
542 To determine enrichment of non-coding transcripts in the polysomes, transcripts were manually  
543 sorted into coding and non-coding (NMD, lincRNA, retained-intron, processed pseudogenes, or  
544 antisense transcripts) groups and compared using a Fisher's exact test, compared to all quantified  
545 transcripts with a 1% FDR.

546

547 **shRNA gene silencing.** Lentiviruses derived from pLKO or pGIPZ were derived from  
548 transfection of 293T cells with packaging plasmids pMD2.G and psPAX2 (gifts from Didier  
549 Trono Addgene plasmids 12259 and 12260) using polyethylenimine MAX (polysciences  
550 #24765). Lentiviruses were filtered at  $0.45 \mu\text{m}$  before aliquoting and storage at  $-80^{\circ}\text{C}$ . TREx-  
551 BCBL1-RTA cells were transduced with lentivirus overnight with  $4 \mu\text{g/mL}$  polybrene  
552 (hexadimethrine bromide, Sigma) and treated the following day with  $1 \mu\text{g/mL}$  puromycin for a  
553 further 2-3 d before seeding experiments. All experiments were seeded without puromycin.  
554 shRNAs for eIF4E2, eIF4G2, and NCBP1 were selected from the GIPZ Lentiviral shRNA  
555 library (ThermoFisher, sh-eIF4E2: V2LHS\_68041; sh-eIF4G2 #1: V3LHS\_323383, sh-eIF4G2  
556 #2: V3LHS\_323384; sh-NCBP1 #1: V3LHS\_639361, sh-NCBP1 #2: V3LHS\_645476). shRNA  
557 sequences for METTL3 were selected from the RNAi Consortium (shMETTL3 - #1:  
558 TRCN0000034715; shMETTL3 - #2: TRCN0000034714) and pLKO vectors were generated

559 according to the RNAi Consortium shRNA cloning protocol  
560 (<https://portals.broadinstitute.org/gpp/public/resources/protocols>). A non-targeting shRNA  
561 sequence was used as a control in all experiments, either pGIPZ-NS (ThermoFisher, RHS\_4346),  
562 or pLKO-NS-Puro, generated by replacing the BamHI/KpnI fragment of containing the  
563 blasticidin selection cassette of pLKO-NS-BSD (a gift from Keith Mostov, Addgene plasmid  
564 #26655 (91)) with the BamHI/KpnI-flanked puromycin selection cassette from pLKO-TRC (a  
565 gift from David Root Addgene plasmid #10878 (92)). Transduced cells were freshly generated for  
566 every experiment and not maintained in culture for long periods. Knockdown was confirmed by  
567 western blot after every lentivirus transduction.

568

569 **Viral replication.** DNase-protected genomes were detected as described in (38). Briefly,  
570 supernatant was treated with DNase I (Sigma) for 30 min at 37°C to digest un-encapsidated  
571 genomes. DNA was then harvested using DNeasy blood minikit (Qiagen) using buffer AL that  
572 had been supplemented with salmon sperm DNA (Invitrogen) as carrier DNA and a luciferase-  
573 encoding plasmid (pGL4.26, Promega). qPCR was then performed to detect viral gene ORF26  
574 and luciferase from the carrier plasmid using *GoTaq* polymerase (Promega) and the  $\Delta\Delta C_T$   
575 method. Intracellular genomes were isolated from cells using DNeasy blood minikit and qPCR as  
576 above.

577

578 **Statistics.** qRT-PCR values were calculated in Excel (Microsoft). Values were imported into  
579 Prism8 (GraphPad) for statistical analysis and graphing. *P* values are represented in the figures  
580 (\*,  $P < 0.05$ ; \*\*,  $P < 0.01$ ; \*\*\*,  $P < 0.001$ ; ns, nonsignificant).

581

## 582 **Acknowledgments**

583 We thank members of the McCormick lab for critical discussion of this manuscript. We thank  
584 Charles Craik (UCSF), Don Ganem (UCSF; Chang-Zuckerberg Biohub), S.-J. Gao (Pitt), David  
585 Lukac (Rutgers), and Jae Jung (USC) for providing reagents.

586

587 **Table 1. Oligonucleotide sequences**

| qPCR Target    | Primer sequences (5'-3') |                         |
|----------------|--------------------------|-------------------------|
|                | Forward                  | Reverse                 |
| luc2           | TTCGGCAACCAGATCATCCC     | TGCGCAAGAATAGCTCCTCC    |
| Rps20          | TTGACTTGCACAGTCCTTCTGA   | ATGGTGACTIONTCCACCTCAAC |
| RACK1          | GTGCTTCTGGAGGCAAGGAT     | TCCCCACCATCTAGCGTGTA    |
| $\beta$ -actin | CTTCCAGCAGATGTGGATCA     | AAAGCCATGCCAATCTCATC    |
| LANA           | TCCCACAGTGTTACATCCG      | GAGGTAAAGGTGTTGCGGGA    |
| Kaposin        | CACGTATCGAGGAGCGGTG      | CAGGGTTCGCAGGGTTCG      |
| VEGF-A         | TTGTTGGAAGAAGCAGCCCA     | AGGGGATGGAGGAAGGTCAA    |
| hIL-6          | TGCAATAACCACCCCTGACC     | GTGCCCATGCTACATTTGCC    |
| vIL-6          | TCTCTTGCTGGTCGGTTCAC     | CGGTACGGTAACAGAGGTTCG   |
| ORF11          | ACATTTGACAACACGCACCG     | AAAATCAGCACGCTCGAGGA    |
| ORF45          | TGATGAAATCGAGTGGGCGG     | CTTAAGCCGCAAAGCAGTGG    |
| ORF59          | CACCAGGCTTCTCCTCTGTG     | TCGCTGACAGACACAGTCAC    |
| K8.1           | AGATACGTCTGCCTCTGGGT     | AAAGTCACGTGGGAGGTTCAC   |
| ORF26          | CAGTTGAGCGTCCCAGATGA     | GGAATACCAACAGGAGGCCG    |
| ORF65          | TGGCTCGCATGAATACCCTG     | CTGCAGATGATCCCGCCTTT    |

588

589

590

591



592 **REFERENCES**

593

- 594 1. Jan E, Mohr I, Walsh D. 2016. A Cap-to-Tail Guide to mRNA Translation Strategies in  
595 Virus-Infected Cells. *Annu Rev Virol* 3:283–307.
- 596 2. Glaunsinger BA. 2015. Modulation of the Translational Landscape During Herpesvirus  
597 Infection. *Annu Rev Virol* 2:311–333.
- 598 3. Arias C, Weisburd B, Stern-Ginossar N, Mercier A, Madrid AS, Bellare P, Holdorf M,  
599 Weissman JS, Ganem D. 2014. KSHV 2.0: a comprehensive annotation of the Kaposi's  
600 sarcoma-associated herpesvirus genome using next-generation sequencing reveals novel  
601 genomic and functional features. *PLoS Pathog* 10:e1003847.
- 602 4. Davis ZH, Hesser CR, Park J, Glaunsinger BA. 2015. Interaction between ORF24 and  
603 ORF34 in the Kaposi's Sarcoma-Associated Herpesvirus Late Gene Transcription Factor  
604 Complex Is Essential for Viral Late Gene Expression. *J Virol* 90:599–604.
- 605 5. Ye X, Zhao Y, Karjoolich J. 2019. The landscape of transcription initiation across latent  
606 and lytic KSHV genomes. *PLoS Pathog* 15:1–26.
- 607 6. Ganem D. 2010. KSHV and the pathogenesis of Kaposi sarcoma: listening to human  
608 biology and medicine. *J Clin Invest* 120:939–949.
- 609 7. Boyne JR, Jackson BR, Taylor A, Macnab SA, Whitehouse A. 2010. Kaposi's  
610 sarcoma-associated herpesvirus ORF57 protein interacts with PYM to enhance translation  
611 of viral intronless mRNAs. *EMBO J* 29:1851–1864.
- 612 8. Sandri-Goldin RM. 2011. The many roles of the highly interactive HSV protein ICP27, a  
613 key regulator of infection. *Future Microbiol* 6:1261–1277.
- 614 9. Sei E, Wang T, Hunter O V, Xie Y, Conrad NK. 2015. HITS-CLIP Analysis Uncovers a  
615 Link between the Kaposi's Sarcoma-Associated Herpesvirus ORF57 Protein and Host  
616 Pre-mRNA Metabolism. *PLoS Pathog* 11:e1004652.
- 617 10. Sharma NR, Majerciak V, Kruhlak MJ, Zheng Z-M. 2017. KSHV inhibits stress granule  
618 formation by viral ORF57 blocking PKR activation. *PLoS Pathog* 13:e1006677.
- 619 11. Tan B, Liu H, Zhang S, da Silva SR, Zhang L, Meng J, Cui X, Yuan H, Sorel O, Zhang S-  
620 W, Huang Y, Gao S-J. 2017. Viral and cellular N6-methyladenosine and N6,2'-O-  
621 dimethyladenosine epitranscriptomes in the KSHV life cycle. *Nat Microbiol* 1–17.
- 622 12. Ye F, Chen ER, Nilsen TW. 2017. Kaposi's Sarcoma-Associated Herpesvirus Utilizes and  
623 Manipulates RNA N6-Adenosine Methylation To Promote Lytic Replication. *J Virol*  
624 91:JVI.00466-17.
- 625 13. Hesser CR, Karjoolich J, Dominissini D, He C, Glaunsinger BA. 2018. N 6-  
626 methyladenosine modification and the YTHDF2 reader protein play cell type specific  
627 roles in lytic viral gene expression during Kaposi's sarcoma-associated herpesvirus  
628 infection. *PLoS Pathog* 14:e1006995.
- 629 14. Baquero-Perez B, Agne A, Carr I, Whitehouse A. 2019. The Tudor SND1 protein is a  
630 m6A RNA reader essential for KSHV replication. *Elife* 5:1–39.
- 631 15. Gilbert W V, Bell TA, Schaening C. 2016. Messenger RNA modifications: Form,  
632 distribution, and function. *Sci (New York, NY)* 352:1408–1412.
- 633 16. Liu J, Yue Y, Han D, Wang X, Fu Y, Zhang L, Jia G, Yu M, Lu Z, Deng X, Dai Q, Chen  
634 W, He C. 2013. A METTL3–METTL14 complex mediates mammalian nuclear RNA N6-  
635 adenosine methylation. *Nat Chem Biol* 10:93–95.
- 636 17. Barbieri I, Tzelepis K, Pandolfini L, Shi J, Millán-Zambrano G, Robson SC, Aspris D,  
637 Migliori V, Bannister AJ, Han N, De Braekeleer E, Ponstingl H, Hendrick A, Vakoc CR,

- 638 Vassiliou GS, Kouzarides T. 2017. Promoter-bound METTL3 maintains myeloid  
639 leukaemia by m6A-dependent translation control. *Nat Publ Gr* 552:126–131.
- 640 18. Meyer KD, Patil DP, Zhou J, Zinoviev A, Skabkin MA, Elemento O, Pestova T V, Qian  
641 S-B, Jaffrey SR. 2015. 5' prime; UTR m6A Promotes Cap-Independent Translation. *Cell*  
642 1–13.
- 643 19. Coots RA, Liu X-M, Mao Y, Dong L, Zhou J, Wan J, Zhang X, Qian S-B. 2017. m6A  
644 Facilitates eIF4F-Independent mRNA Translation. *Mol Cell* 68:504-514.e7.
- 645 20. Ries RJ, Zaccara S, Klein P, Olarerin-George A, Namkoong S, Pickering BF, Patil DP,  
646 Kwak H, Lee JH, Jaffrey SR. 2019. m6A enhances the phase separation potential of  
647 mRNA. *Nature* 1–23.
- 648 21. Mao Y, Dong L, Liu XM, Guo J, Ma H, Shen B, Qian SB. 2019. m6A in mRNA coding  
649 regions promotes translation via the RNA helicase-containing YTHDC2. *Nat Commun*  
650 10:1–11.
- 651 22. Liu N, Dai Q, Zheng G, He C, Parisien M, Pan T. 2015. N6 -methyladenosine-dependent  
652 RNA structural switches regulate RNA-protein interactions. *Nature* 518:560–564.
- 653 23. Wang X, Zhao BS, Roundtree IA, Lu Z, Han D, Ma H, Weng X, Chen K, Shi H, He C.  
654 2015. N6-methyladenosine Modulates Messenger RNA Translation Efficiency. *Cell*  
655 161:1388–1399.
- 656 24. Dominissini D, Moshitch-Moshkovitz S, Salmon-Divon M, Amariglio N, Rechavi G.  
657 2013. Transcriptome-wide mapping of N6-methyladenosine by m6A-seq based on  
658 immunocapturing and massively parallel sequencing. *Nat Protoc* 8:176–189.
- 659 25. Thoreen CC, Chantranupong L, Keys HR, Wang T, Gray NS, Sabatini DM. 2012. A  
660 unifying model for mTORC1-mediated regulation of mRNA translation. *Nature* 486:109–  
661 113.
- 662 26. Hinnebusch AG. 2014. The Scanning Mechanism of Eukaryotic Translation Initiation.  
663 *Annu Rev Biochem* 83:779–812.
- 664 27. Merrick WC. 2015. eIF4F: A Retrospective. *J Biol Chem* 290:24091–24099.
- 665 28. Pelletier J, Sonenberg N. 2019. The Organizing Principles of Eukaryotic Ribosome  
666 Recruitment. *Annu Rev Biochem* 88:307–335.
- 667 29. Hsieh AC, Hsieh AC, Liu Y, Liu Y, Edlind MP, Edlind MP, Ingolia NT, Ingolia NT,  
668 Janes MR, Janes MR, Sher A, Sher A, Shi EY, Shi EY, Stumpf CR, Stumpf CR,  
669 Christensen C, Christensen C, Bonham MJ, Bonham MJ, Wang S, Wang S, Ren P, Ren P,  
670 Martin M, Martin M, Jessen K, Jessen K, Feldman ME, Feldman ME, Weissman JS,  
671 Weissman JS, Shokat KM, Shokat KM, Rommel C, Rommel C, Ruggero D, Ruggero D.  
672 2012. The translational landscape of mTOR signalling steers cancer initiation and  
673 metastasis. *Nature* 485:55–61.
- 674 30. Tcherkezian J, Cargnello M, Romeo Y, Huttlin EL, Lavoie G, Gygi SP, Roux PP. 2014.  
675 Proteomic analysis of cap-dependent translation identifies LARP1 as a key regulator of  
676 5'TOP mRNA translation. *Genes Dev* 28:357–371.
- 677 31. Lahr RM, Fonseca BD, Ciotti GE, Al-Ashtal HA, Jia J-J, Niklaus MR, Blagden SP, Alain  
678 T, Berman AJ. 2017. La-related protein 1 (LARP1) binds the mRNA cap, blocking eIF4F  
679 assembly on TOP mRNAs. *Elife* 6.
- 680 32. Philippe L, Vasseur J-J, Debart F, Thoreen CC. 2017. La-related protein 1 (LARP1)  
681 repression of TOP mRNA translation is mediated through its cap-binding domain and  
682 controlled by an adjacent regulatory region. *Nucleic Acids Res.*
- 683 33. Uniacke J, Holterman CE, Lachance G, Franovic A, Jacob MD, Fabian MR, Payette J,

- 684 Holcik M, Pause A, Lee S. 2013. An oxygen-regulated switch in the protein synthesis  
685 machinery. *Nature* 486:126–129.
- 686 34. Maquat LE, Tarn W-Y, Isken O. 2010. The Pioneer Round of Translation: Features and  
687 Functions. *Cell* 142:368–374.
- 688 35. Lee ASY, Kranzusch PJ, Doudna JA, Cate JHD. 2016. eIF3d is an mRNA cap-binding  
689 protein that is required for specialized translation initiation. *Nature* 1–16.
- 690 36. Clippinger AJ, Maguire TG, Alwine JC. 2011. The Changing Role of mTOR Kinase in the  
691 Maintenance of Protein Synthesis during Human Cytomegalovirus Infection. *J Virol*  
692 85:3930–3939.
- 693 37. Walsh D, Perez C, Notary J, Mohr I. 2005. Regulation of the Translation Initiation Factor  
694 eIF4F by Multiple Mechanisms in Human Cytomegalovirus-Infected Cells. *J Virol*  
695 79:8057–8064.
- 696 38. Pringle ES, Robinson C-A, McCormick C. 2019. KSHV lytic replication interferes with  
697 mTORC1 regulation of autophagy and viral protein synthesis. *J Virol*.
- 698 39. Arias C, Walsh D, Harbell J, Wilson AC, Mohr I. 2009. Activation of Host Translational  
699 Control Pathways by a Viral Developmental Switch. *PLoS Pathog* 5:e1000334.
- 700 40. Lenarcic EM, Ziehr B, De Leon G, Mitchell D, Moorman NJ. 2014. Differential Role for  
701 Host Translation Factors in Host and Viral Protein Synthesis during Human  
702 Cytomegalovirus Infection. *J Virol* 88:1473–1483.
- 703 41. McMahon R, Zaborowska I, Walsh D. 2010. Noncytotoxic Inhibition of Viral Infection  
704 through eIF4F-Independent Suppression of Translation by 4EGI-1. *J Virol* 85:853–864.
- 705 42. Thoreen CC, Kang SA, Chang JW, Liu Q, Zhang J, Gao Y, Reichling LJ, Sim T, Sabatini  
706 DM, Gray NS. 2009. An ATP-competitive Mammalian Target of Rapamycin Inhibitor  
707 Reveals Rapamycin-resistant Functions of mTORC1. *J Biol Chem* 284:8023–8032.
- 708 43. Tabtieng T, Degtarev A, Gaglia MM. 2018. Caspase-Dependent Suppression of Type I  
709 Interferon Signaling Promotes Kaposi’s Sarcoma-Associated Herpesvirus Lytic  
710 Replication. *J Virol* 92.
- 711 44. Choe J, Lin S, Zhang W, Liu Q, Wang L, Ramirez-Moya J, Du P, Kim W, Tang S, Sliz P,  
712 Santisteban P, George RE, Richards WG, Wong K-K, Locker N, Slack FJ, Gregory RI.  
713 2018. mRNA circularization by METTL3–eIF3h enhances translation and promotes  
714 oncogenesis. *Nature* 1–25.
- 715 45. Lin S, Choe J, Du P, Triboulet R, Gregory RI. 2016. The m6A Methyltransferase  
716 METTL3 Promotes Translation in Human Cancer Cells. *Mol Cell* 62:335–345.
- 717 46. Sinclair NR. 2001. Fc-signalling in the modulation of immune responses by passive  
718 antibody. *Scand J Immunol* 53:322–330.
- 719 47. Covarrubias S, Gaglia MM, Kumar GR, Wong W, Jackson AO, Glaunsinger BA. 2011.  
720 Coordinated Destruction of Cellular Messages in Translation Complexes by the  
721 Gammaherpesvirus Host Shutoff Factor and the Mammalian Exonuclease Xrn1. *PLoS*  
722 *Pathog* 7:e1002339.
- 723 48. Davison AJ, Stow ND. 2005. New Genes from Old: Redeployment of dUTPase by  
724 Herpesviruses. *J Virol* 79:12880–12892.
- 725 49. Quackenbush J. 2002. Microarray data normalization and transformation. *Nat Genet*  
726 32:496–501.
- 727 50. Andreev DE, O’Connor PBF, Fahey C, Kenny EM, Terenin IM, Dmitriev SE, Cormican  
728 P, Morris DW, Shatsky IN, Baranov P V. 2015. Translation of 5’ leaders is pervasive in  
729 genes resistant to eIF2 repression. *Elife* 4:e03971.

- 730 51. Joazeiro CAP. 2017. Ribosomal Stalling During Translation: Providing Substrates for  
731 Ribosome-Associated Protein Quality Control. *Annu Rev Cell Dev Biol* 33:343–368.
- 732 52. Pringle ES, McCormick C, Cheng Z. 2018. Polysome Profiling Analysis of mRNA and  
733 Associated Proteins Engaged in Translation. *Curr Protoc Mol Biol* 125:e79.
- 734 53. Heyer EE, Moore MJ. 2016. Redefining the Translational Status of 80S Monosomes. *Cell*  
735 164:757–769.
- 736 54. Sin SH, Roy D, Wang L, Staudt MR, Fakhari FD, Patel DD, Henry D, Harrington WJ,  
737 Damania BA, Dittmer DP. 2007. Rapamycin is efficacious against primary effusion  
738 lymphoma (PEL) cell lines in vivo by inhibiting autocrine signaling. *Blood* 109:2165–  
739 2173.
- 740 55. Bais C, Santomasso B, Coso O, Arvanitakis L, Raaka EG, Gutkind JS, Asch AS,  
741 Cesarman E, Gershengorn MC, Mesri EA, Gerhengorn MC. 1998. G-protein-coupled  
742 receptor of Kaposi’s sarcoma-associated herpesvirus is a viral oncogene and angiogenesis  
743 activator. *Nature* 391:86–89.
- 744 56. Stallone G, Stallone G, Schena A, Schena A, Infante B, Infante B, Di Paolo S, Di Paolo S,  
745 Loverre A, Loverre A, Maggio G, Maggio G, Ranieri E, Ranieri E, Gesualdo L, Gesualdo  
746 L, Schena FP, Schena FP, Grandaliano G, Grandaliano G. 2005. Sirolimus for Kaposi’s  
747 sarcoma in renal-transplant recipients. *N Engl J Med* 352:1317–1323.
- 748 57. Liang Q, Chang B, Brulois KF, Castro K, Min CK, Rodgers MA, Shi M, Ge J, Feng P, Oh  
749 BH, Jung JU. 2013. Kaposi’s Sarcoma-Associated Herpesvirus K7 Modulates Rubicon-  
750 Mediated Inhibition of Autophagosome Maturation. *J Virol* 87:12499–12503.
- 751 58. Lee J-S, Lee J-S, Li Q, Li Q, Lee J-Y, Lee J-Y, Lee SH, Lee SH, Jeong JH, Jeong JH, Lee  
752 H-R, Lee H-R, Chang H, Chang H, Zhou F-C, Zhou F-C, Gao S-J, Gao S-J, Liang C,  
753 Liang C, Jung JU, Jung JU. 2009. FLIP-mediated autophagy regulation in cell death  
754 control. *Nat Cell Biol* 11:1355–1362.
- 755 59. Pattingre S, Pattingre S, Tassa A, Tassa A, Qu X, Qu X, Garuti R, Garuti R, Liang XH,  
756 Liang XH, Mizushima N, Mizushima N, Packer M, Packer M, Schneider MD, Schneider  
757 MD, Levine B, Levine B. 2005. Bcl-2 Antiapoptotic Proteins Inhibit Beclin 1-Dependent  
758 Autophagy. *Cell* 122:927–939.
- 759 60. Satoh S, Hijikata M, Handa H, Shimotohno K. 1999. Caspase-mediated cleavage of  
760 eukaryotic translation initiation factor subunit 2 $\alpha$ . *Biochem J* 342:65–70.
- 761 61. Clemens MJ, Bushell M, Jeffrey IW, Pain VM, Morley SJ. 2000. Translation initiation  
762 factor modifications and the regulation of protein synthesis in apoptotic cells. *Cell Death*  
763 *Differ* 7:603–615.
- 764 62. Bushell M, Poncet D, Marissen WE, Flotow H, Lloyd RE, Clemens MJ, Morley SJ. 2000.  
765 Cleavage of polypeptide chain initiation factor eIF4GI during apoptosis in lymphoma  
766 cells: characterisation of an internal fragment generated by caspase-3-mediated cleavage.  
767 *Cell Death Differ* 7:628–636.
- 768 63. Majerciak V, Kruhlak M, Dagur PK, McCoy J Philip J, Zheng Z-M. 2010. Caspase-7  
769 Cleavage of Kaposi Sarcoma-associated Herpesvirus ORF57 Confers a Cellular Function  
770 against Viral Lytic Gene Expression. *J Biol Chem* 285:11297–11307.
- 771 64. Henis-Korenblit S, Shani G, Sines T, Marash L, Shohat G, Kimchi A. 2002. The caspase-  
772 cleaved DAP5 protein supports internal ribosome entry site-mediated translation of death  
773 proteins. *Proc Natl Acad Sci U S A* 99:5400–5405.
- 774 65. Schmidt EK, Clavarino G, Ceppi M, Pierre P. 2009. SUNSET, a nonradioactive method to  
775 monitor protein synthesis. *Nat Methods* 6:275–277.



- 776 66. Covarrubias S, Richner JM, Clyde K, Lee YJ, Glaunsinger BA. 2009. Host Shutoff Is a  
777 Conserved Phenotype of Gammaherpesvirus Infection and Is Orchestrated Exclusively  
778 from the Cytoplasm. *J Virol* 83:9554–9566.
- 779 67. Glaunsinger B, Ganem D. 2004. Highly Selective Escape from KSHV-mediated Host  
780 mRNA Shutoff and Its Implications for Viral Pathogenesis. *J Exp Med* 200:391–398.
- 781 68. Belin S, Hacot S, Daudignon L, Therizols G, Pourpe S, Mertani HC, Rosa-Calatrava M,  
782 Diaz J-J. 2010. Purification of ribosomes from human cell lines. *Curr Protoc cell Biol*  
783 Chapter 3:Unit 3.40.
- 784 69. Mehta P, Woo P, Venkataraman K, Karzai AW. 2012. Ribosome purification approaches  
785 for studying interactions of regulatory proteins and RNAs with the ribosome. *Methods*  
786 *Mol Biol* 905:273–289.
- 787 70. Parra C, Ertlund A, Alard A, Ruggles K, Ueberheide B, Schneider RJ. 2018. A  
788 widespread alternate form of cap-dependent mRNA translation initiation. *Nat Commun* 1–  
789 9.
- 790 71. Castelli LM, Talavera D, Kershaw CJ, Mohammad-Qureshi SS, Costello JL, Rowe W,  
791 Sims PFG, Grant CM, Hubbard SJ, Ashe MP, Pavitt GD. 2015. The 4E-BP Caf20p  
792 Mediates Both eIF4E-Dependent and Independent Repression of Translation. *PLOS Genet*  
793 11:e1005233.
- 794 72. Brugarolas J, Lei K, Hurley RL, Manning BD, Reiling JH, Hafen E, Witters LA, Ellisen  
795 LW, Kaelin WG. 2004. Regulation of mTOR function in response to hypoxia by REDD1  
796 and the TSC1/TSC2 tumor suppressor complex. *Genes Dev* 18:2893–2904.
- 797 73. Verma D, Li D-J, Krueger B, Renne R, Swaminathan S. 2015. Identification of the  
798 physiological gene targets of the essential lytic replicative Kaposi’s sarcoma-associated  
799 herpesvirus ORF57 protein. *J Virol* 89:1688–1702.
- 800 74. Majerciak V, Uranishi H, Kruhlak M, Pilkington GR, Massimelli MJ, Bear J, Pavlakis  
801 GN, Felber BK, Zheng ZM. 2011. Kaposi’s Sarcoma-Associated Herpesvirus ORF57  
802 Interacts with Cellular RNA Export Cofactors RBM15 and OTT3 To Promote Expression  
803 of Viral ORF59. *J Virol* 85:1528–1540.
- 804 75. Izumiya Y, Kobayashi K, Kim KY, Pochampalli M, Izumiya C, Shevchenko B, Wang D-  
805 H, Huerta SB, Martinez A, Campbell M, Kung H-J. 2013. Kaposi’s Sarcoma-Associated  
806 Herpesvirus K-Rta Exhibits SUMO-Targeting Ubiquitin Ligase (STUbL) Like Activity  
807 and Is Essential for Viral Reactivation. *PLoS Pathog* 9:e1003506.
- 808 76. Du Y, Hou G, Zhang H, Dou J, He J, Guo Y, Li L, Chen R, Wang Y, Deng R, Huang J,  
809 Jiang B, Xu M, Cheng J, Chen G-Q, Zhao X, Yu J. 2018. SUMOylation of the m6A-RNA  
810 methyltransferase METTL3 modulates its function. *Nucleic Acids Res* 46:5195–5208.
- 811 77. Biever A, Glock C, Tushev G, Ciirdaeva E, Dalmay T, Langer JD, Schuman EM. 2020.  
812 Monosomes actively translate synaptic mRNAs in neuronal processes. *Science* (80- ) 367.
- 813 78. Sadler R, Wu L, Forghani B, Renne R, Zhong W, Herndier B, Ganem D. 1999. A complex  
814 translational program generates multiple novel proteins from the latently expressed  
815 kaposin (K12) locus of Kaposi’s sarcoma-associated herpesvirus. *J Virol* 73:5722–5730.
- 816 79. Toptan T, Fonseca L, Kwun HJ, Chang Y, Moore PS. 2013. Complex Alternative  
817 Cytoplasmic Protein Isoforms of the Kaposi’s Sarcoma-Associated Herpesvirus Latency-  
818 Associated Nuclear Antigen 1 Generated through Noncanonical Translation Initiation. *J*  
819 *Virol* 87:2744–2755.
- 820 80. Gutierrez E, Shin B-S, Woolstenhulme CJ, Kim J-R, Saini P, Buskirk AR, Dever TE.  
821 2013. eIF5A Promotes Translation of Polyproline Motifs. *Mol Cell* 51:35–45.

- 822 81. Rubio RM, Depledge DP, Bianco C, Thompson L, Mohr I. 2018. RNA m<sup>6</sup>A modification  
823 enzymes shape innate responses to DNA by regulating interferon  $\beta$ . *Genes Dev* 32:1472–  
824 1484.
- 825 82. Winkler R, Gillis E, Lasman L, Safra M, Geula S, Soyris C, Nachshon A, Tai-Schmiedel  
826 J, Friedman N, Le-Trilling VTK, Trilling M, Mandelboim M, Hanna JH, Schwartz S,  
827 Stern-Ginossar N. 2018. m<sup>6</sup>A modification controls the innate immune response to  
828 infection by targeting type I interferons. *Nat Immunol* 1–15.
- 829 83. Liu J, Dou X, Chen C, Chen C, Liu C, Michelle Xu M, Zhao S, Shen B, Gao Y, Han D,  
830 He C. 2020. N<sup>6</sup>-methyladenosine of chromosome-associated regulatory RNA regulates  
831 chromatin state and transcription. *Science (80- )* 367:580–586.
- 832 84. Larralde O, Smith RWP, Wilkie GS, Malik P, Gray NK, Clements JB. 2006. Direct  
833 Stimulation of Translation by the Multifunctional Herpesvirus ICP27 Protein. *J Virol*  
834 80:1588–1591.
- 835 85. Ricci EP, Mure F, Gruffat H, Decimo D, Medina-Palazon C, Ohlmann T, Manet E. 2009.  
836 Translation of intronless RNAs is strongly stimulated by the Epstein–Barr virus mRNA  
837 export factor EB2. *Nucleic Acids Res* 37:4932–4943.
- 838 86. Nakamura H, Lu M, Gwack Y, Souvlis J, Zeichner SL, Jung JU. 2003. Global changes in  
839 Kaposi’s sarcoma-associated virus gene expression patterns following expression of a  
840 tetracycline-inducible Rta transactivator. *J Virol* 77:4205–4220.
- 841 87. Myoung J, Ganem D. 2011. Generation of a doxycycline-inducible KSHV producer cell  
842 line of endothelial origin: maintenance of tight latency with efficient reactivation upon  
843 induction. *J Virol Methods* 174:12–21.
- 844 88. Patro R, Duggal G, Love MI, Irizarry RA, Kingsford C. 2017. Salmon provides fast and  
845 bias-aware quantification of transcript expression. *Nat Methods* 14:417–419.
- 846 89. Ritchie ME, Phipson B, Wu D, Hu Y, Law CW, Shi W, Smyth GK. 2015. limma powers  
847 differential expression analyses for RNA-sequencing and microarray studies. *Nucleic*  
848 *Acids Res* 43:e47–e47.
- 849 90. Mi H, Muruganujan A, Casagrande JT, Thomas PD. 2013. Large-scale gene function  
850 analysis with the PANTHER classification system. *Nat Protoc* 8:1551–1566.
- 851 91. Bryant DM, Datta A, Rodríguez-Fraticelli AE, Peränen J, Martín-Belmonte F, Mostov  
852 KE. 2010. A molecular network for de novo generation of the apical surface and lumen.  
853 *Nat Cell Biol* 12:1035–1045.
- 854 92. Moffat J, Grueneberg DA, Yang X, Kim SY, Kloepfer AM, Hinkle G, Piquani B,  
855 Eisenhaure TM, Luo B, Grenier JK, Carpenter AE, Foo SY, Stewart SA, Stockwell BR,  
856 Hacohen N, Hahn WC, Lander ES, Sabatini DM, Root DE. 2006. A Lentiviral RNAi  
857 Library for Human and Mouse Genes Applied to an Arrayed Viral High-Content Screen.  
858 *Cell* 124:1283–1298.
- 859



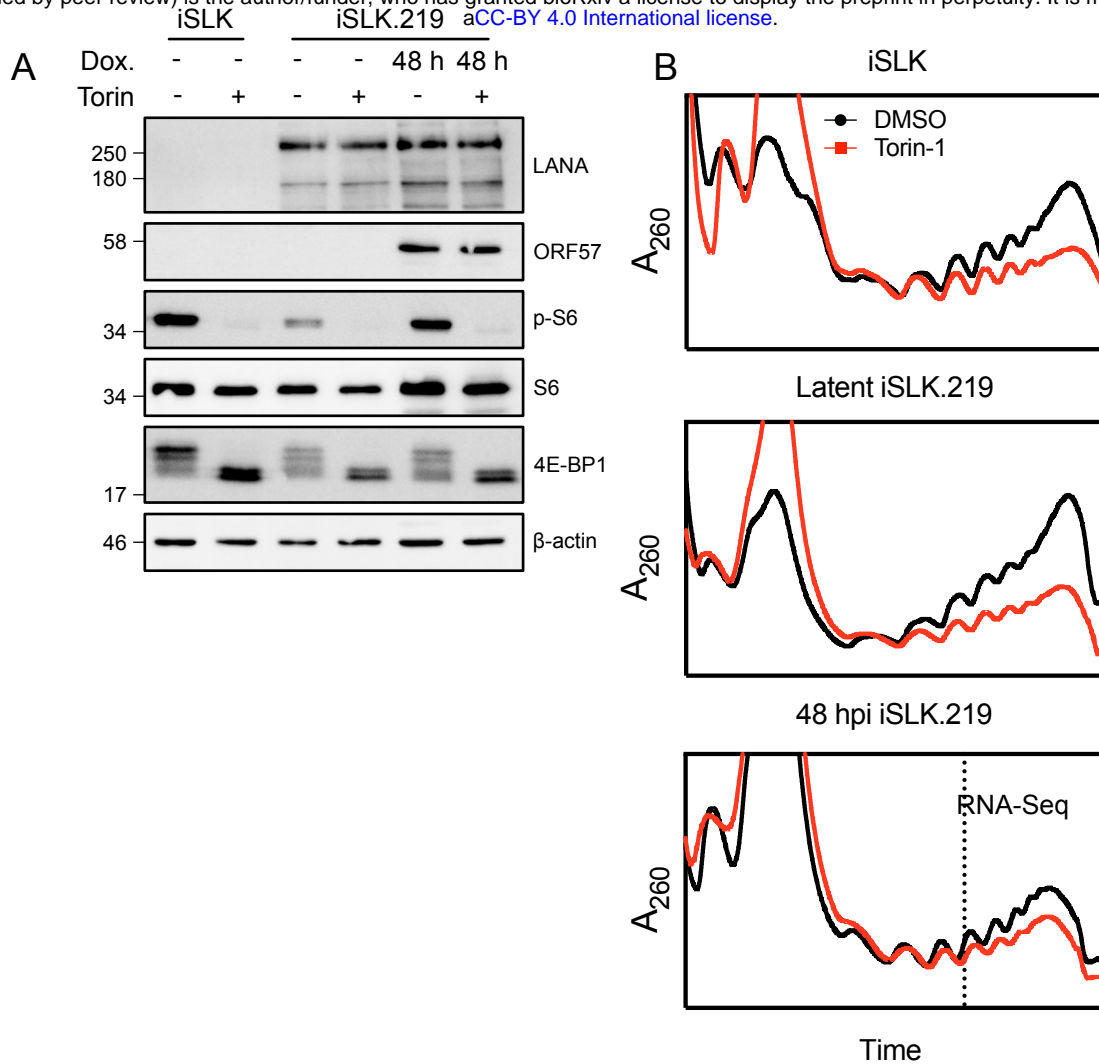

**Fig 1. KSHV lytic replication reduces protein synthesis.** (A) Western blots of whole cell lysates for polysome profiles. (B) Polysome profiles of uninfected, latent, or 48 hpi iSLK.219 treated with either Torin or DMSO for 2 h prior to harvest. Cells were treated with 100  $\mu$ g/mL cycloheximide (CHX) for 5 minutes prior to harvest to prevent elongation. Cells were lysed in the presence of CHX and loaded on a 7-47% linear sucrose gradient. After separation by ultracentrifugation, the abundance of RNA ( $A_{260}$  nm) in the gradient was continually measure as fractions were collected. RNA from the 48 hpi polysome fractions was isolated for sequencing.

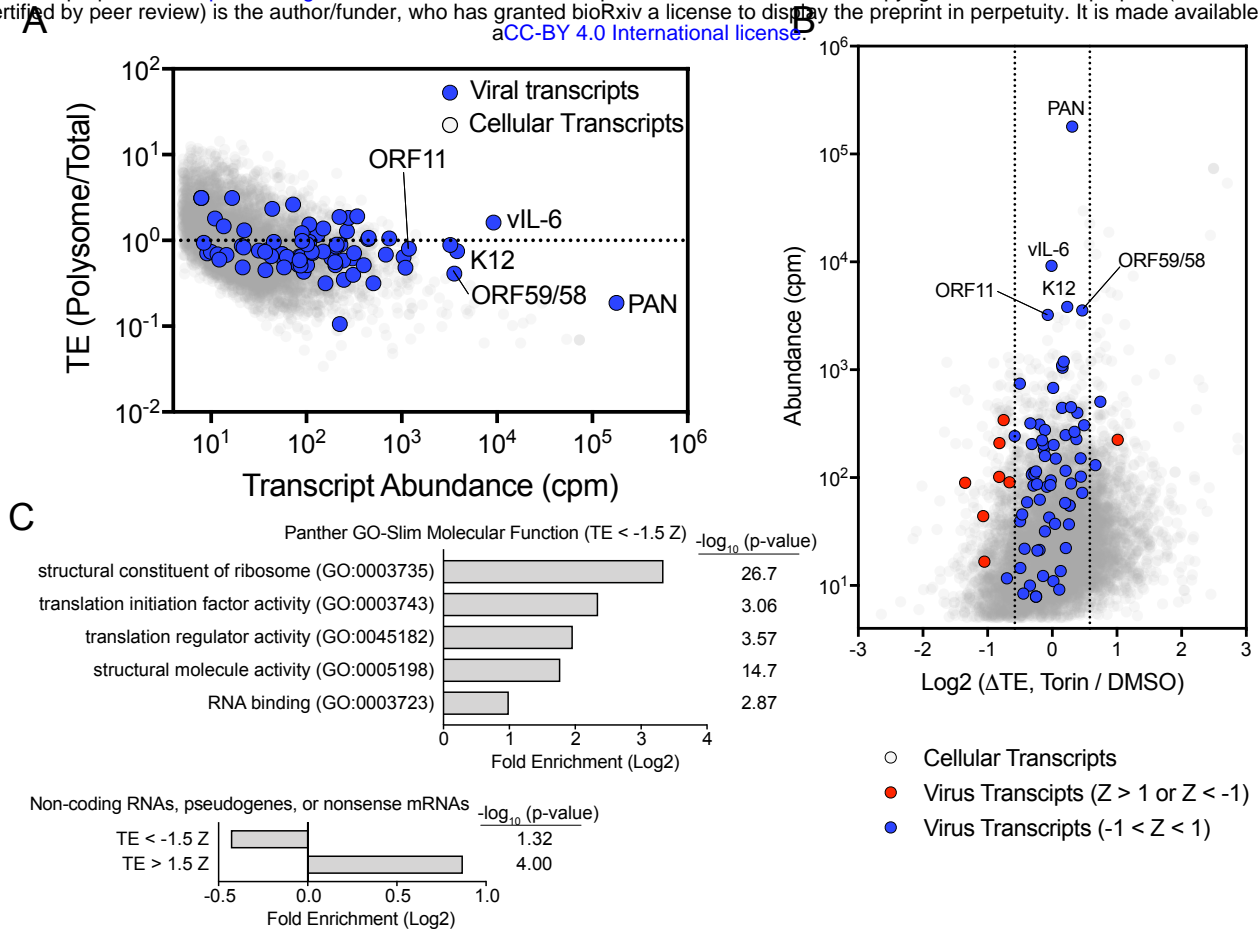

**Fig 2. eIF4F disassembly does not affect translational efficiencies of viral mRNAs.** mRNA from translating ribosomes (of DMSO treated cells) was sequenced and aligned to both the human and KSHV genomes. Viral transcripts are depicted in blue on top of the grey background of cellular genes. The dashed line represents the mean TE of all transcripts. (C) The  $\Delta$  TE of viral transcripts is depicted in blue or red on a grey background of cellular genes. Viral transcripts beyond one SD of the mean are red, viral transcripts within one SD are depicted in blue. Vertical lines represent a 1.5-fold change in transcript TE. (D) Panther Gene Ontology-Slim molecular functions with a decreased TE during Torin treatment. (E) Depletion or enrichment of transcripts not predicted to encode functional proteins from TE < -1.5 Z or TE > 1.5 Z, respectively.

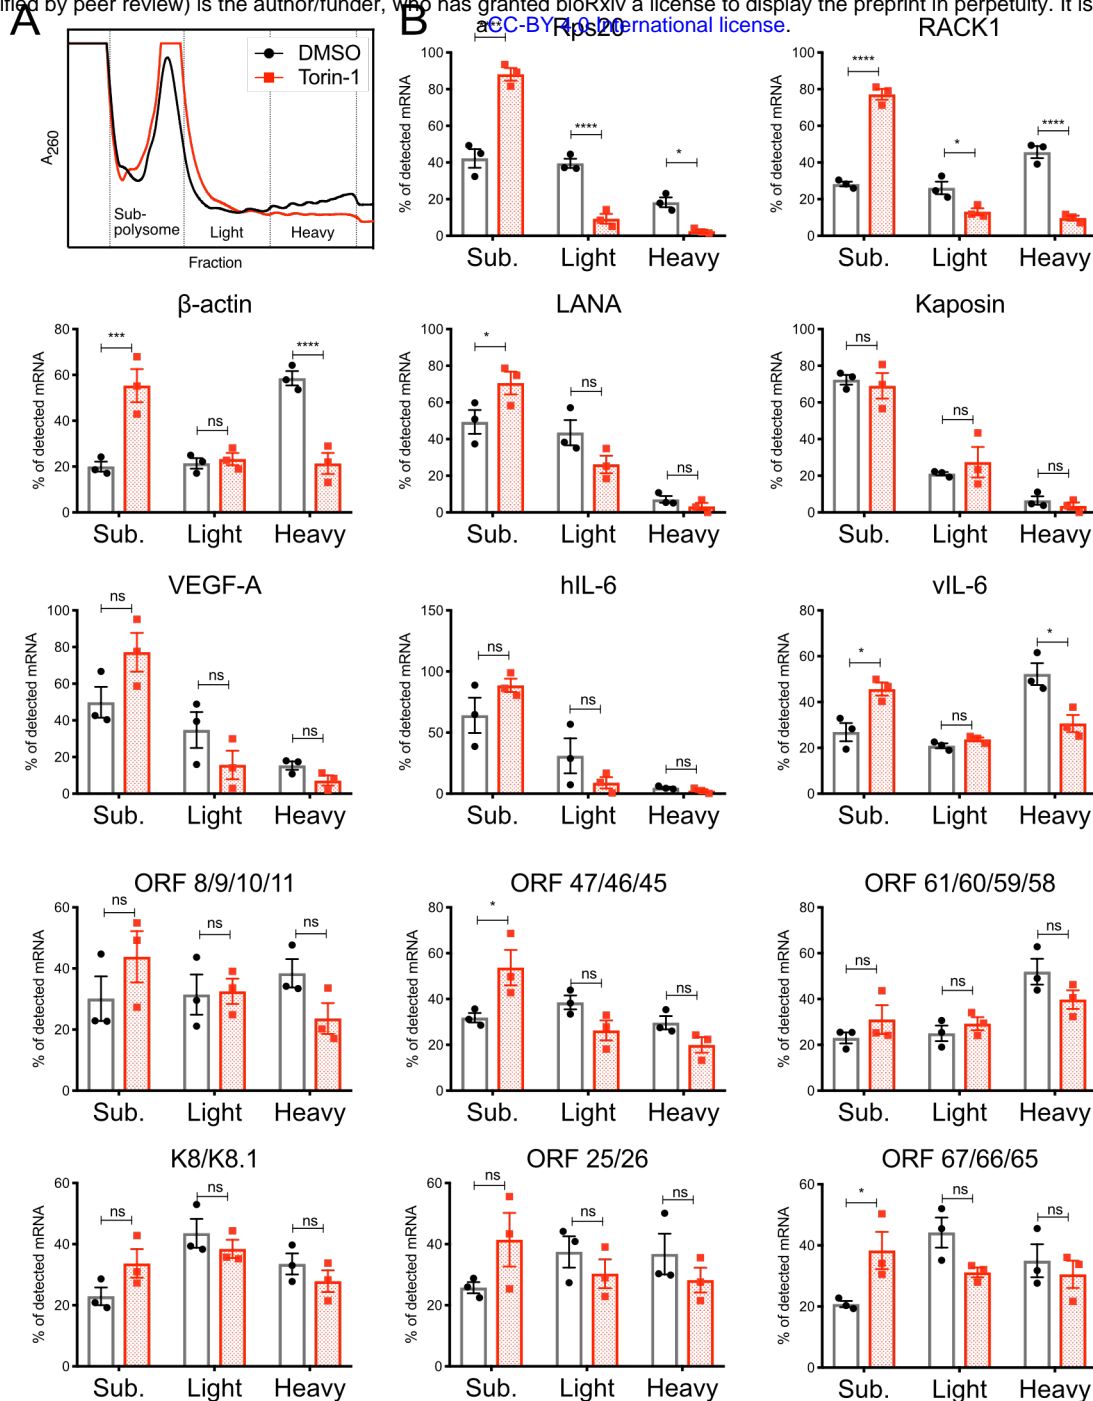

**Fig 3. eIF4F disassembly does not deplete viral mRNAs from polysomes.** (A) Polysome profile of TRex-BCBL1-RTA cells induced with 1 µg/mL dox for 24 h. Torin or DMSO control were added 2 h prior to harvest and polysome analysis. (B) qRT-PCR analysis of cellular and viral transcripts in polysome fractions. Total RNA was isolated from polysome fractions. RNA was co-precipitated with GlycoBlue and T7-transcribed luciferase RNA to improve and normalize for recovery. RNA was analysed by qRT-PCR for cellular, and viral transcripts. Vertical lines depict the boundaries between the monosomes, light polysome, and heavy polysome fractions (n=3; means±SEM; statistical significance was determined by two-way ANOVA).

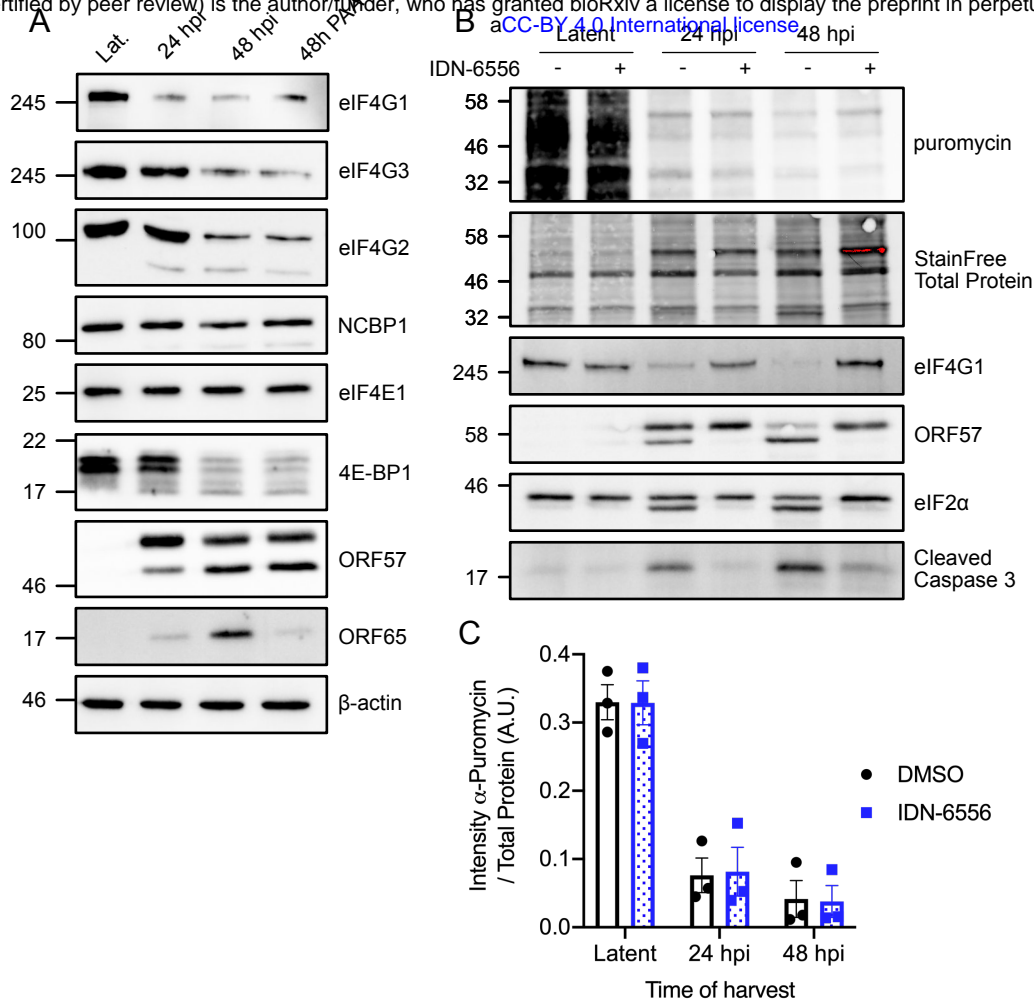

**Fig 4. KSHV lytic replication reduces levels of host translation initiation factors (TIFs) but mTORC1 regulation of eIF4F formation remains intact.** (A) TREx-BCBL1-RTA cells were treated with 1  $\mu$ g/mL doxycycline. 500  $\mu$ M PAA was added to inhibit genome replication as indicated. Cell lysate were probed by western blot as indicated. (B) TREx-BCBL1-RTA cells were reactivated as in (A). 10  $\mu$ M IDN-6556 was added as indicated to inhibit caspases. 10  $\mu$ g/mL of puromycin was added to all sample 10 minutes prior to harvest. (C) Quantification of puromycin blot relative to total protein amount (n=3; means $\pm$ SEM; statistical significance was determined by two-way ANOVA).

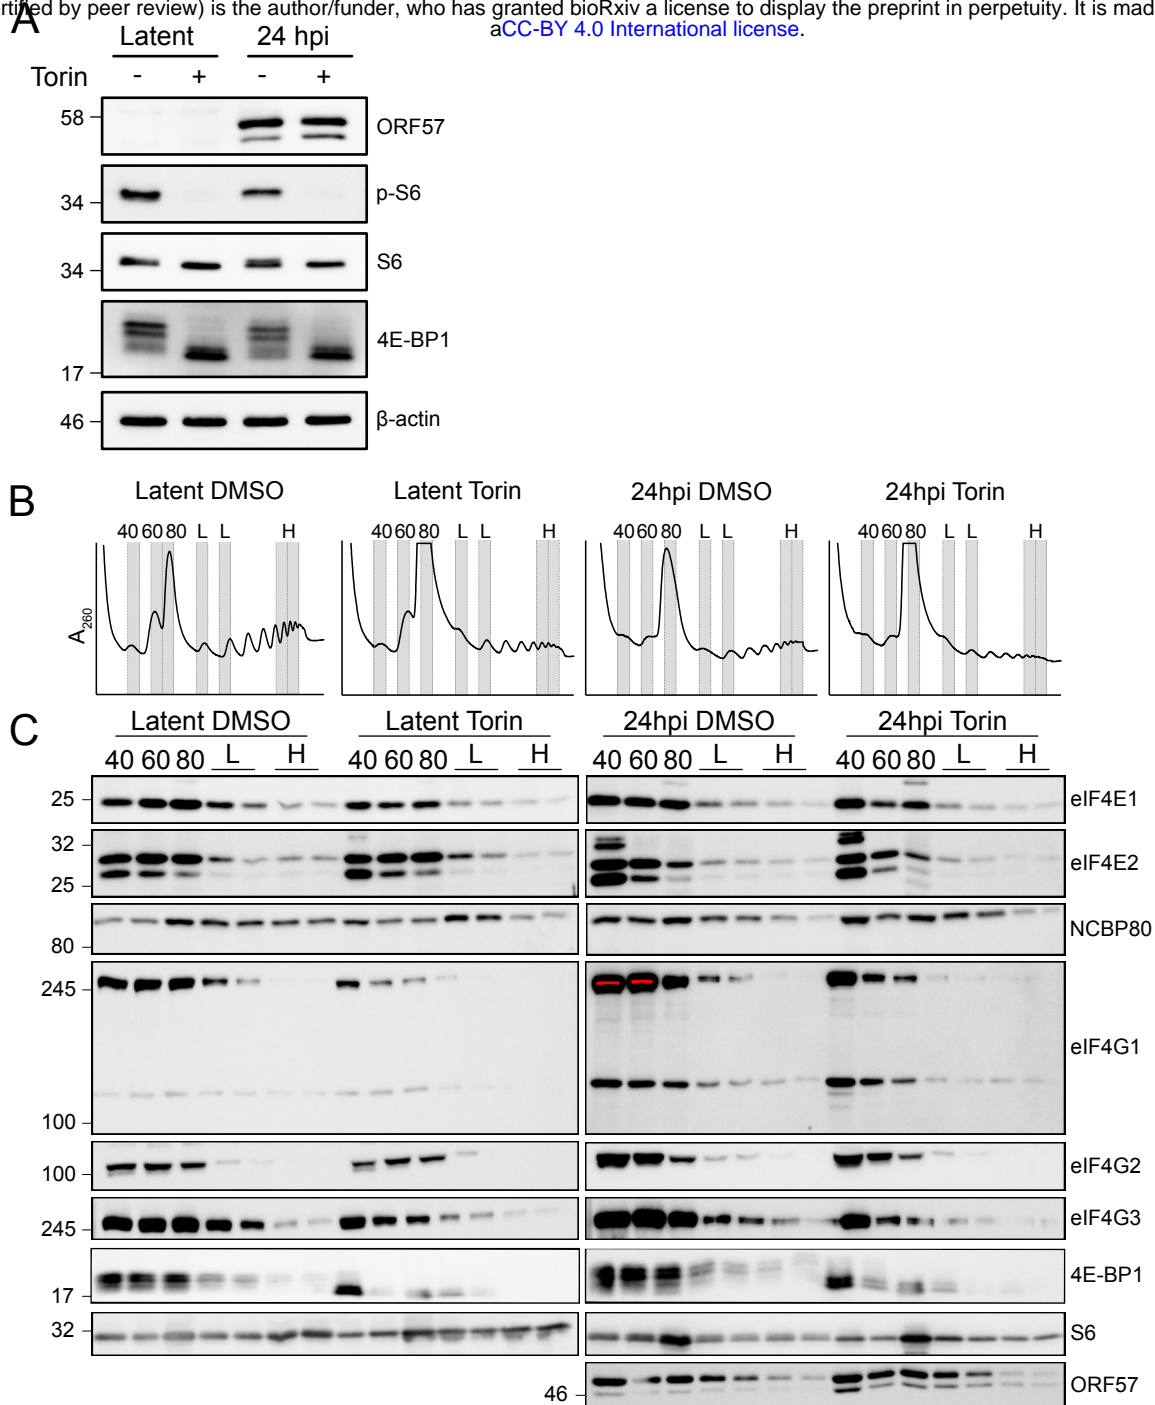

**Fig 5. eIF4F disassembly selectively displaces host translation initiation factors from polysomes during KSHV latency and lytic replication.** (A) Western blots of TREx-BCBL1-RTA whole cell lysates for polysome profiles. (B) Polysome profiles of TREx-BCBL1-RTA cells at 0 or 24 hpi, treated with Torin or DMSO control. Indicated 40S, 60S, 80S, light, and heavy polysome fractions were isolated for analysis. (C) Fractions were precipitated with glycogen and ethanol. The precipitate was resuspended in 1x Laemmli buffer and used for western blot analysis as indicated. Equal volume was loaded in all lanes.

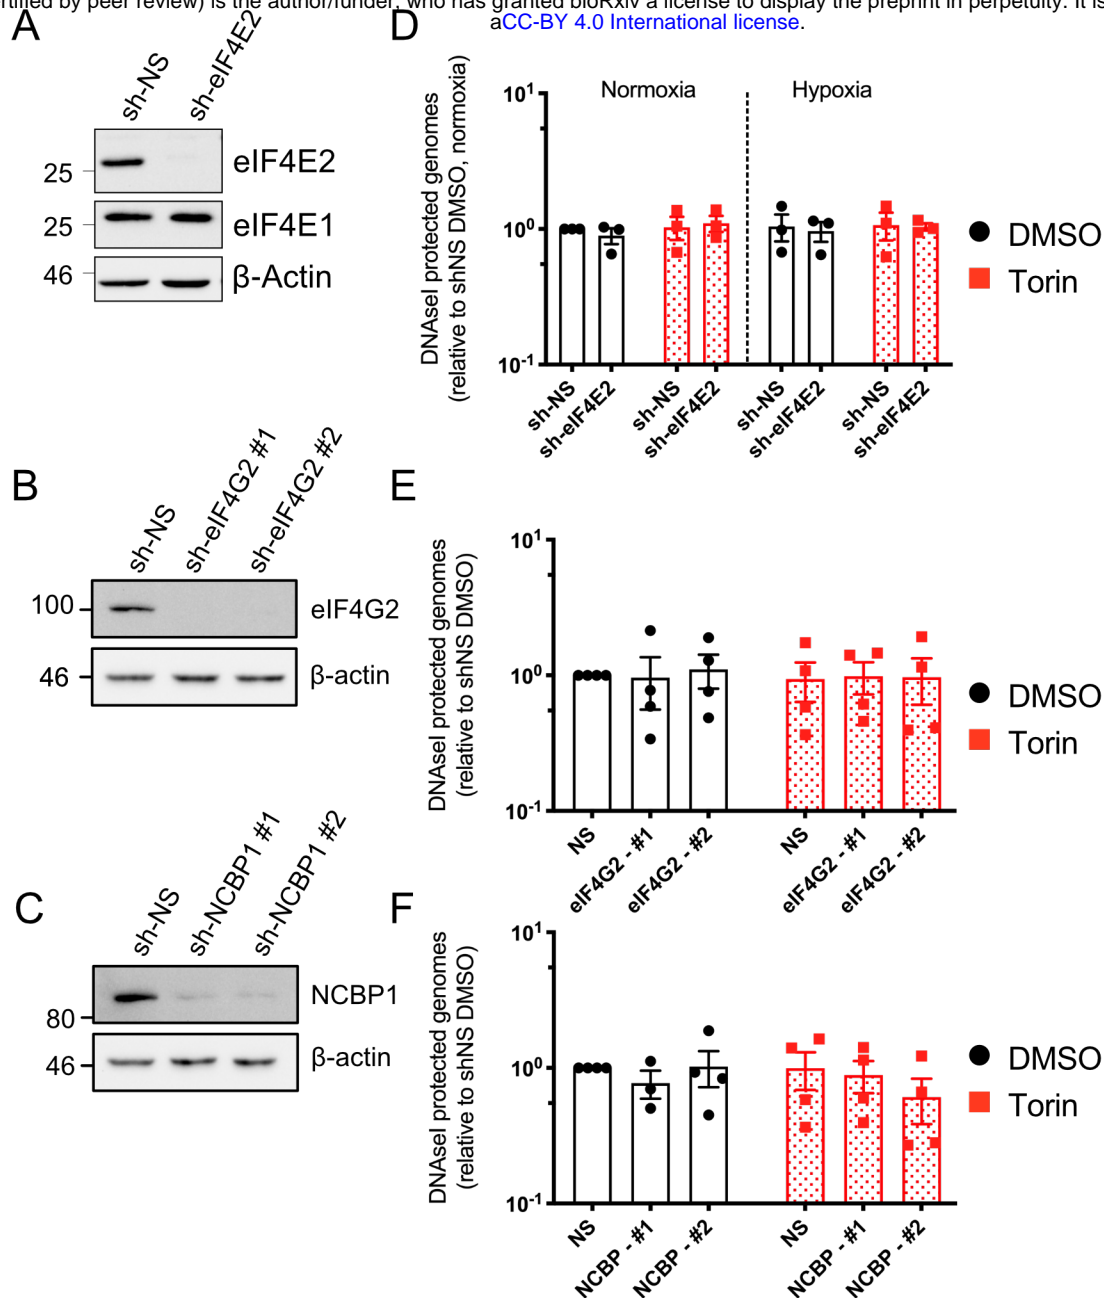

**Fig. 6. KSHV virion production is unaffected by silencing of polysome-associated alternative translation initiation factors eIF4E2, eIF4G2 and NCBP1.** (A-C) Knockdown of eIF4E2, NCBP1, or eIF4G2 in latent TREx-BCBL1-RTA cells. (D) eIF4E2 knockdown cells were reactivated with 1  $\mu$ g/mL dox. At 24 hpi, cells were treated with DMSO or Torin, then either maintained in normal culture conditions, or were moved to a hypoxia chamber. Supernatant was harvested at 48hpi and processed for detection of DNase-protected genomes. (E-F) Reactivated TREx-BCBL-RTA cells were treated with DMSO or Torin at 24hpi. Supernatant was harvested at 48hpi and processed for detection of DNase-protected genomes (n=3-4; means $\pm$ SEM; statistical significance was determined by two-way ANOVA).



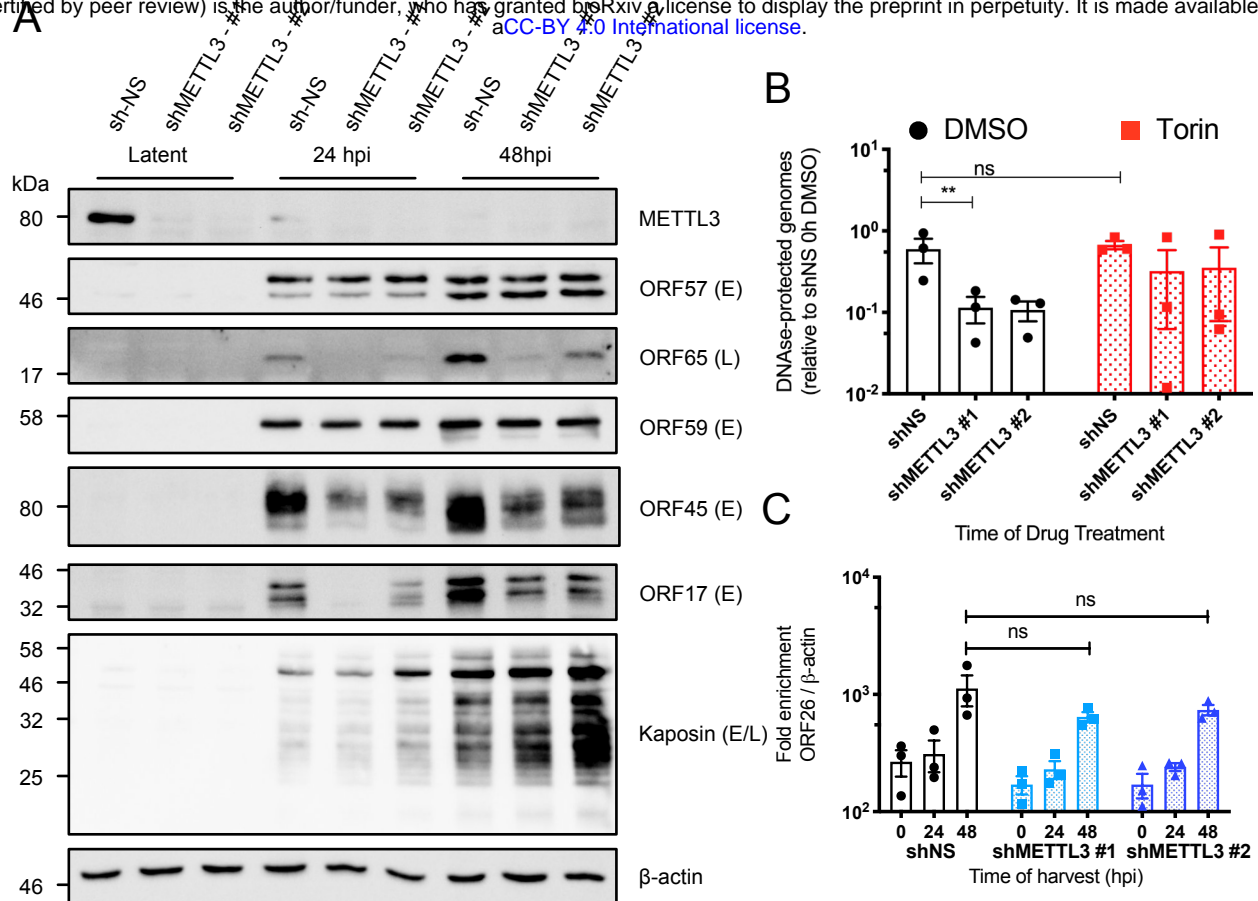

**Fig. 7. The N6-methyladenosine methyltransferase METTL3 is required for efficient virion production but not genome replication** (A) TREx-BCBL1-RTA cells were transduced with lentiviral shRNA constructs and selected with puromycin. Cells were reactivated with 1  $\mu$ g/mL doxycycline and harvested as indicated. Lysates were probed for METTL3, early (E) proteins ORF57, ORF59 and ORF17 or late (L) proteins ORF65 or Kaposin. (B) Cells transduced and reactivated as in (A) were treated with DMSO or Torin at 0 or 24 hpi. Supernatant was harvested at 48hpi and processed for detection of DNase-protected genomes (n=3; means $\pm$ SEM; statistical significance was determined by two-way ANOVA). (C) qPCR of intracellular viral genomes from DNA extracted from TREx-BCBL1-RTA cells treated as in (A) (n=3; means $\pm$ SEM; statistical significance was determined by two-way ANOVA).

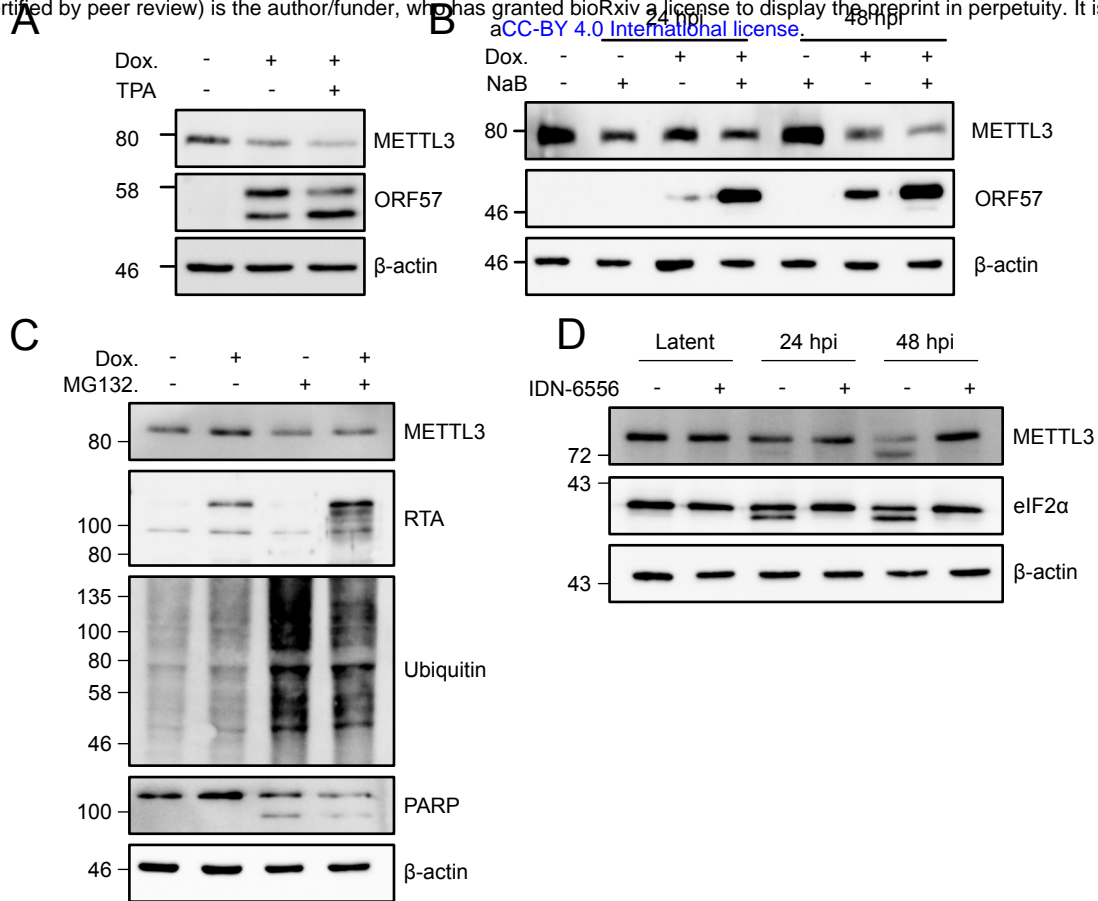

**Fig. 8. METTL3 is degraded by caspase activity during lytic replication.** (A) TREx-BCBL1-RTA cells were reactivated with 1  $\mu$ g/mL dox in the presence of absence of 20 ng/mL 12-O-Tetradecanoylphorbol-13-acetate (TPA) and (B) iSLK.219 cells reactivated with 1  $\mu$ g/mL dox in the presence of absence of sodium butyrate (NaB). METTL3 abundance was assessed by western blot. (C) Uninfected iSLK cells treated with 1  $\mu$ g/mL dox to stimulate RTA expression were concurrently treated 10  $\mu$ g/mL MG132 for 24 h and probed as indicated by western blot. (D) TREx-BCBL1-RTA cells treated with 1  $\mu$ g/mL dox and 10  $\mu$ M of IDN-6556 to inhibit caspases. Lysates were probed as indicated by western blot.
